# Supplementary material for: Hydrogen from wood gasification with CCS – a techno-environmental analysis of production and use as transport fuel
Source: Royal Society of Chemistry journal article supplement (doi:10.1039/d0se01637c), 2021-01-01
Supplement: d0se01637c1.zip [file d0se01637c1.zip]

## Sheet: Contents
	Publication Title	Hydrogen from wood gasification with CCS - a techno-environmental analysis of production and use as transport fuel
	Authors	Cristina Antonini, Karin Treyer, Emanuele Moioli, Christian Bauer, Marco Mazzotti
	Electronic Supplementary Information:	Life Cycle Inventories and Life Cycle Impact Assessment results
	This workbook contains the following sheets:
	Sheet name	Description	Data sources	Complementary jupyter notebooks	Comment jupyter notebook
	LCI_Cstorage_WoodMarkets	LCI necessary for the creation of the datasets for H2 production (e.g. adapted wood chips market, CO2 storage)	Own datasets, ecoinvent v3.6 cut-off combined with own information	1_LCI Import.ipynb	Import of necessary LCI data into BW2 (read sheet "LCI_Cstorage_WoodMarkets")
	DS creation_woody gas	LCI as used in a jupyter notebook for the creation of the datasets for modelling the production of H2 via wood gasification.	Outputs from modellings in ASPEN PLUS	2_H2 from wood gasification.ipynb	Creation of datasets for hydrogen production with gasification of wood in BW2 (read sheet "DS creation_woody gas")
	LCIA_H2production	All LCIA results for H2 production via wood gasification as well as reforming of natural gas and biomethane.	Outputs from LCIA calculations with jupyter notebook (H2 from woody gasification) ; Antonini, C., Treyer, K. et al. 2020. Hydrogen production from natural gas and biomethane with carbon capture and storage – a techno-environmental analysis. DOI: 10.1039/D0SE00222D (Paper) Sustainable Energy Fuels, 2020, 4, 2967-2986 (H2 from SMR and ATR of natural gas or biomethane)	3_contribution_analysis_wood gasification.ipynb	Calculation of LCIA results for chosen LCIA methods and subsequent calculation of contributions of foreground processes to defined contribution categories. Export of results in csv format.
	PassengerCars_Midsize_2020	LCIA results for driving 1 vkm in a mid-size passenger car, reference year 2020.	Calculations based on https://carculator.psi.ch
	Truck_7.5tRegional_2020	LCIA results for driving 1 tkm in a truck of 7.5t size in a regional driving cycle, reference year 2020.	Calculations based on https://carculator.psi.ch

## Sheet: LCI_Cstorage_WoodMarkets
cutoff	9
Database	Elegancy
Activity	CO2 storage and transport 200km pipeline, storage 1000m/2025
comment	This dataset represents the transport of CO2 and storage in a saline aquifer.
location	RER
production amount	1
type	process
unit	kilogram
Exchanges
name	reference product	amount	unit	database	categories	location	type	comment
CO2 storage and transport 200km pipeline, storage 1000m/2025	CO2 storage and transport 200km pipeline, storage 1000m/2025	1	kilogram	Elegancy		RER	production	reference product
drilling, deep borehole/m	drilling, deep borehole/m	1.69e-08	meter	Elegancy		RER	technosphere	CO2 transport and storage; taken from CARMA dataset "CO2 storage/100% SNG, post, 200km pipeline, storage 1000m/2025"
market for gas turbine, 10MW electrical	gas turbine, 10MW electrical	2.54e-11	unit	ecoinvent 3.5 cutoff		GLO	technosphere	CO2 transport and storage; taken from CARMA dataset "CO2 storage/100% SNG, post, 200km pipeline, storage 1000m/2025"; changed from medium-voltage to high-voltage due to ETH's comment that the grid access of electricity at the plant is at high voltage
market group for electricity, high voltage	electricity, high voltage	0.00948	kilowatt hour	ecoinvent 3.5 cutoff	RER	RER	technosphere	CO2 transport and storage; taken from CARMA dataset "CO2 storage/100% SNG, post, 200km pipeline, storage 1000m/2025"
transport, pipeline, supercritical CO2, 200km w/o recompression	transport, pipeline, supercritical CO2, 200km w/o recompression	0.0297	ton kilometer	Elegancy		RER	technosphere	CO2 transport and storage; taken from CARMA dataset "CO2 storage/100% SNG, post, 200km pipeline, storage 1000m/2025"
Activity	drilling, deep borehole/m
comment	This dataset represents the transport of CO2 and storage in a saline aquifer.
location	RER
production amount	1
type	process
unit	meter
Exchanges
name	reference product	amount	unit	database	categories	location	type	comment
drilling, deep borehole/m	drilling, deep borehole/m	1	meter	Elegancy		RER	production	reference product
AOX, Adsorbable Organic Halogen as Cl		4.78e-07	kilogram	biosphere3	water::surface water		biosphere
Aluminium		0.06	kilogram	biosphere3	water::surface water		biosphere
Arsenic, ion		0.00042	kilogram	biosphere3	water::surface water		biosphere
BOD5, Biological Oxygen Demand		0.3	kilogram	biosphere3	water::surface water		biosphere
Barium		0.006	kilogram	biosphere3	water::surface water		biosphere
Boron		0.009	kilogram	biosphere3	water::surface water		biosphere
COD, Chemical Oxygen Demand		3	kilogram	biosphere3	water::surface water		biosphere
Calcium, ion		0.6	kilogram	biosphere3	water::surface water		biosphere
Chloride		6	kilogram	biosphere3	water::surface water		biosphere
Chromium, ion		0.0006	kilogram	biosphere3	water::surface water		biosphere
DOC, Dissolved Organic Carbon		0.3	kilogram	biosphere3	water::surface water		biosphere
Fluoride		0.003	kilogram	biosphere3	water::surface water		biosphere
Hydrocarbons, aromatic		0.003	kilogram	biosphere3	water::surface water		biosphere
Iron, ion		0.18	kilogram	biosphere3	water::surface water		biosphere
Magnesium		0.12	kilogram	biosphere3	water::surface water		biosphere
Manganese		0.003	kilogram	biosphere3	water::surface water		biosphere
Methane, dichloro-, HCC-30		0.06	kilogram	biosphere3	water::surface water		biosphere
Particulates, > 10 um		0.0148	kilogram	biosphere3	air::non-urban air or from high stacks		biosphere
Phosphorus		0.0012	kilogram	biosphere3	water::surface water		biosphere
Potassium, ion		0.9	kilogram	biosphere3	water::surface water		biosphere
Silicon		0.03	kilogram	biosphere3	water::surface water		biosphere
Sodium, ion		6	kilogram	biosphere3	water::surface water		biosphere
Strontium		0.018	kilogram	biosphere3	water::surface water		biosphere
Sulfur		0.12	kilogram	biosphere3	water::surface water		biosphere
TOC, Total Organic Carbon		0.3	kilogram	biosphere3	water::surface water		biosphere
Water, well, in ground		3.34	cubic meter	biosphere3	natural resource::in water		biosphere
Zinc, ion		0.0012	kilogram	biosphere3	water::surface water		biosphere
activated bentonite production	activated bentonite	20	kilogram	ecoinvent 3.5 cutoff		DE	technosphere
barite production	barite	270	kilogram	ecoinvent 3.5 cutoff		RER	technosphere
cement production, Portland	cement, Portland	200	kilogram	ecoinvent 3.5 cutoff		CH	technosphere
diesel, burned in diesel-electric generating set, 18.5kW	diesel, burned in diesel-electric generating set, 18.5kW	6300	megajoule	ecoinvent 3.5 cutoff		GLO	technosphere
lignite mine operation	lignite	0.2	kilogram	ecoinvent 3.5 cutoff		RER	technosphere
market for chemical, organic	chemical, organic	9.05	kilogram	ecoinvent 3.5 cutoff		GLO	technosphere
market for chemicals, inorganic	chemical, inorganic	42.2	kilogram	ecoinvent 3.5 cutoff		GLO	technosphere
market for lubricating oil	lubricating oil	60	kilogram	ecoinvent 3.5 cutoff		RER	technosphere
market for steel, low-alloyed	steel, low-alloyed	210	kilogram	ecoinvent 3.5 cutoff		GLO	technosphere
market for transport, freight train	transport, freight train	487	ton kilometer	ecoinvent 3.5 cutoff		Europe without Switzerland	technosphere
market for transport, freight, lorry, unspecified	transport, freight, lorry, unspecified	81.1	ton kilometer	ecoinvent 3.5 cutoff		RER	technosphere
treatment of drilling waste, landfarming	drilling waste	-237	kilogram	ecoinvent 3.5 cutoff		CH	technosphere
treatment of drilling waste, residual material landfill	drilling waste	-158	kilogram	ecoinvent 3.5 cutoff		CH	technosphere
treatment of hazardous waste, hazardous waste incineration	hazardous waste, for incineration	-5	kilogram	ecoinvent 3.5 cutoff		CH	technosphere
Activity	transport, pipeline, supercritical CO2, 200km w/o recompression
comment	This dataset represents the transport of CO2 and storage in a saline aquifer.
location	RER
production amount	1
type	process
unit	ton kilometer
Exchanges
name	reference product	amount	unit	database	categories	location	type	comment
transport, pipeline, supercritical CO2, 200km w/o recompression	transport, pipeline, supercritical CO2, 200km w/o recompression	1	ton kilometer	Elegancy		RER	production	reference product
Carbon dioxide, fossil		0.00026	kilogram	biosphere3	air::urban air close to ground		biosphere
pipeline, supercritical CO2/km	pipeline, supercritical CO2/km	4.22e-09	kilometer	Elegancy		RER	technosphere
Activity	pipeline, supercritical CO2/km
comment	This dataset represents the transport of CO2 and storage in a saline aquifer.
location	RER
production amount	1
type	process
unit	kilometer
Exchanges
name	reference product	amount	unit	database	categories	location	type	comment
pipeline, supercritical CO2/km	pipeline, supercritical CO2/km	1	kilometer	Elegancy		RER	production	reference product
Occupation, construction site		3330	square meter-year	biosphere3	natural resource::land		biosphere
Transformation, from forest, unspecified		2000	square meter	biosphere3	natural resource::land		biosphere
Transformation, to heterogeneous, agricultural		2000	square meter	biosphere3	natural resource::land		biosphere
Water, unspecified natural origin		187	cubic meter	biosphere3	natural resource::in water		biosphere
drawing of pipe, steel	drawing of pipe, steel	270000	kilogram	ecoinvent 3.5 cutoff		RER	technosphere
gravel and sand quarry operation	sand	4400000	kilogram	ecoinvent 3.5 cutoff		CH	technosphere
market for diesel, burned in building machine	diesel, burned in building machine	3310000	megajoule	ecoinvent 3.5 cutoff		GLO	technosphere
market for steel, low-alloyed	steel, low-alloyed	270000	kilogram	ecoinvent 3.5 cutoff		GLO	technosphere
market for stone wool, packed	stone wool, packed	5120	kilogram	ecoinvent 3.5 cutoff		GLO	technosphere
market for transport, freight train	transport, freight train	55100	ton kilometer	ecoinvent 3.5 cutoff		Europe without Switzerland	technosphere
market for transport, freight, lorry, unspecified	transport, freight, lorry, unspecified	315000	ton kilometer	ecoinvent 3.5 cutoff		RER	technosphere
transport, helicopter	transport, helicopter	26	hour	ecoinvent 3.5 cutoff		GLO	technosphere
transport, helicopter, LTO cycle	transport, helicopter, LTO cycle	10.4	unit	ecoinvent 3.5 cutoff		GLO	technosphere
treatment of inert waste, inert material landfill	inert waste, for final disposal	-4400000	kilogram	ecoinvent 3.5 cutoff		CH	technosphere
treatment of scrap steel, inert material landfill	scrap steel	-135000	kilogram	ecoinvent 3.5 cutoff		CH	technosphere
treatment of waste mineral wool, inert material landfill	waste mineral wool, for final disposal	-5120	kilogram	ecoinvent 3.5 cutoff		CH	technosphere
Activity	market for wood chips, wet, measured as dry mass, CF = -1
comment	Market as in original v3.6 cutoff with suppliers which are corrupting the C balance omitted; with carbon uptake from atmosphere
location	CH
production amount	1
unit	kilogram
Exchanges
name	reference product	amount	unit	database	categories	location	type	Comment
market for wood chips, wet, measured as dry mass, CF = -1	wood chips, wet, measured as dry mass, CF = -1	1	kilogram	Elegancy		CH	production
market for transport, freight, lorry, unspecified	transport, freight, lorry, unspecified	0.24	ton kilometer	cutoff36		RER	technosphere
wood chips production, softwood, at sawmill, CF = -1	wood chips, wet, measured as dry mass, CF = -1	0	kilogram	cutoff36		CH	technosphere	supplier not considered due to issues in the datasets and in the carbon balance
wood chips production, hardwood, at sawmill, CF = -1	wood chips, wet, measured as dry mass, CF = -1	0	kilogram	cutoff36		CH	technosphere	supplier not considered due to issues in the datasets and in the carbon balance
softwood forestry, mixed species, sustainable forest management, CF = -1	wood chips, wet, measured as dry mass, CF = -1	0.229116	kilogram	cutoff36		CH	technosphere	supplier scaled up according to the market with all suppliers
hardwood forestry, mixed species, sustainable forest management, CF = -1	wood chips, wet, measured as dry mass, CF = -1	0.770884	kilogram	cutoff36		CH	technosphere	supplier scaled up according to the market with all suppliers
Activity	market for wood chips, wet, measured as dry mass, CF = -1, all suppliers
comment	Market as in original v3.6 cutoff with all suppliers but corrupted C balance; with carbon uptake from atmosphere
location	CH
production amount	1
unit	kilogram
Exchanges
name	reference product	amount	unit	database	categories	location	type	Comment
market for wood chips, wet, measured as dry mass, CF = -1, all suppliers	wood chips, wet, measured as dry mass, CF = -1	1	kilogram	Elegancy		CH	production
market for transport, freight, lorry, unspecified	transport, freight, lorry, unspecified	0.24	ton kilometer	cutoff36		RER	technosphere
wood chips production, softwood, at sawmill, CF = -1	wood chips, wet, measured as dry mass, CF = -1	0.14554	kilogram	cutoff36		CH	technosphere
wood chips production, hardwood, at sawmill, CF = -1	wood chips, wet, measured as dry mass, CF = -1	0.012791	kilogram	cutoff36		CH	technosphere
softwood forestry, mixed species, sustainable forest management, CF = -1	wood chips, wet, measured as dry mass, CF = -1	0.19284	kilogram	cutoff36		CH	technosphere
hardwood forestry, mixed species, sustainable forest management, CF = -1	wood chips, wet, measured as dry mass, CF = -1	0.64883	kilogram	cutoff36		CH	technosphere
Activity	softwood forestry, mixed species, sustainable forest management, CF = -1
comment
location	CH
production amount	1
unit	kilogram
Exchanges
name	reference product	amount	unit	database	categories	location	type	Comment
softwood forestry, mixed species, sustainable forest management, CF = -1	wood chips, wet, measured as dry mass, CF = -1	1	kilogram	Elegancy		CH	production
delimbing, with excavator-based processor	delimbing/sorting, excavator-based processor	2.09318e-05	hour	cutoff36		RER	technosphere
forwarding, forwarder	forwarding, forwarder	2.43182e-05	hour	cutoff36		RER	technosphere
harvesting, forestry harvester	harvesting, forestry harvester	1.82727e-05	hour	cutoff36		RER	technosphere
market for diesel, burned in building machine	diesel, burned in building machine	0.00396079	megajoule	cutoff36		GLO	technosphere
market for gravel, crushed	gravel, crushed	0.0921115	kilogram	cutoff36		CH	technosphere
market for transport, helicopter	transport, helicopter	2.93182e-06	hour	cutoff36		GLO	technosphere
power sawing, without catalytic converter	power sawing, without catalytic converter	0.00142355	hour	cutoff36		RER	technosphere
skidding, skidder	skidding, skidder	0.000173182	hour	cutoff36		RER	technosphere
wood chipping, mobile chipper, at forest road	wood chipping, chipper, mobile, diesel, at forest road	6.02617e-05	hour	cutoff36		RER	technosphere
yarding and processing, mobile cable yarder on truck	cable yarding	7.63636e-06	hour	cutoff36		RER	technosphere
yarding, mobile cable yarder on trailer	cable yarding	1.85909e-05	hour	cutoff36		RER	technosphere
yarding, sled yarder	cable yarding	3.43182e-06	hour	cutoff36		RER	technosphere
Carbon dioxide, to soil or biomass stock		1.81133	kilogram	biosphere3	soil		biosphere	Changed from "Carbon dioxide, in air - natural resource - in air". The carbon content of the wood amounts to 0.494 kgC/kg wood (measured as dry mass)
Energy, gross calorific value, in biomass		20.4	megajoule	biosphere3	natural resource::biotic		biosphere
Occupation, forest, extensive		2.06971	square meter-year	biosphere3	natural resource::land		biosphere
Occupation, traffic area, rail/road embankment		0.0368473	square meter-year	biosphere3	natural resource::land		biosphere
Transformation, from forest, extensive		0.0159209	square meter	biosphere3	natural resource::land		biosphere
Transformation, from traffic area, rail/road embankment		0.000283441	square meter	biosphere3	natural resource::land		biosphere
Transformation, to forest, extensive		0.0159209	square meter	biosphere3	natural resource::land		biosphere
Transformation, to traffic area, rail/road embankment		0.000283441	square meter	biosphere3	natural resource::land		biosphere
Wood, soft, standing		0.00227273	cubic meter	biosphere3	natural resource::biotic		biosphere
Activity	hardwood forestry, mixed species, sustainable forest management, CF = -1
comment
location	CH
production amount	1
unit	kilogram
Exchanges
name	reference product	amount	unit	database	categories	location	type	Comment
hardwood forestry, mixed species, sustainable forest management, CF = -1	wood chips, wet, measured as dry mass, CF = -1	1	kilogram	Elegancy		CH	production
delimbing, with excavator-based processor	delimbing/sorting, excavator-based processor	7.83026e-06	hour	cutoff36		RER	technosphere
forwarding, forwarder	forwarding, forwarder	3.11612e-05	hour	cutoff36		RER	technosphere
harvesting, forestry harvester	harvesting, forestry harvester	2.4929e-05	hour	cutoff36		RER	technosphere
market for diesel, burned in building machine	diesel, burned in building machine	0.00339002	megajoule	cutoff36		GLO	technosphere
market for gravel, crushed	gravel, crushed	0.0788376	kilogram	cutoff36		CH	technosphere
market for transport, helicopter	transport, helicopter	7.28693e-07	hour	cutoff36		GLO	technosphere
power sawing, without catalytic converter	power sawing, without catalytic converter	0.000616481	hour	cutoff36		RER	technosphere
skidding, skidder	skidding, skidder	0.000119691	hour	cutoff36		RER	technosphere
wood chipping, mobile chipper, at forest road	wood chipping, chipper, mobile, diesel, at forest road	4.14299e-05	hour	cutoff36		RER	technosphere
yarding and processing, mobile cable yarder on truck	cable yarding	4.28267e-06	hour	cutoff36		RER	technosphere
yarding, mobile cable yarder on trailer	cable yarding	8.98082e-06	hour	cutoff36		RER	technosphere
yarding, sled yarder	cable yarding	1.19851e-07	hour	cutoff36		RER	technosphere
Carbon dioxide, to soil or biomass stock		1.81133	kilogram	biosphere3	soil		biosphere	Changed from "Carbon dioxide, in air - natural resource - in air". The carbon content of the wood amounts to 0.494 kgC/kg wood (measured as dry mass)
Energy, gross calorific value, in biomass		19.6	megajoule	biosphere3	natural resource::biotic		biosphere
Occupation, forest, extensive		1.77145	square meter-year	biosphere3	natural resource::land		biosphere
Occupation, traffic area, rail/road embankment		0.0315374	square meter-year	biosphere3	natural resource::land		biosphere
Transformation, from forest, extensive		0.0136266	square meter	biosphere3	natural resource::land		biosphere
Transformation, from traffic area, rail/road embankment		0.000242595	square meter	biosphere3	natural resource::land		biosphere
Transformation, to forest, extensive		0.0136266	square meter	biosphere3	natural resource::land		biosphere
Transformation, to traffic area, rail/road embankment		0.000242595	square meter	biosphere3	natural resource::land		biosphere
Wood, hard, standing		0.00159801	cubic meter	biosphere3	natural resource::biotic		biosphere
Activity	wood chips production, softwood, at sawmill, CF = -1
comment
location	CH
production amount	1
unit	kilogram
Exchanges
name	reference product	amount	unit	database	categories	location	type	Comment
wood chips production, softwood, at sawmill, CF = -1	wood chips, wet, measured as dry mass, CF = -1	1	kilogram	Elegancy		CH	production
market for chipper, stationary, electric	chipper, stationary, electric	5.3e-08	unit	cutoff36		GLO	technosphere
market for electricity, medium voltage	electricity, medium voltage	0.0258	kilowatt hour	cutoff36		CH	technosphere
sawing, softwood, CF = -1	slab and siding, softwood, wet, measured as dry mass, CF = -1	1	kilogram	cutoff36		CH	technosphere
market for lubricating oil	lubricating oil	2.04e-06	kilogram	cutoff36		RER	technosphere
market for steel, low-alloyed, hot rolled	steel, low-alloyed, hot rolled	4.08e-06	kilogram	cutoff36		GLO	technosphere
Activity	wood chips production, hardwood, at sawmill, CF = -1
comment
location	CH
production amount	1
unit	kilogram
Exchanges
name	reference product	amount	unit	database	categories	location	type	Comment
wood chips production, hardwood, at sawmill, CF = -1	wood chips, wet, measured as dry mass, CF = -1	1	kilogram	Elegancy		CH	production
market for chipper, stationary, electric	chipper, stationary, electric	5.3e-08	unit	cutoff36		GLO	technosphere
market for electricity, medium voltage	electricity, medium voltage	0.0197	kilowatt hour	cutoff36		CH	technosphere
sawing, hardwood, CF = -1	slab and siding, hardwood, wet, measured as dry mass, CF = -1	1	kilogram	cutoff36		CH	technosphere
market for lubricating oil	lubricating oil	2.04e-06	kilogram	cutoff36		RER	technosphere
market for steel, low-alloyed, hot rolled	steel, low-alloyed, hot rolled	4.08e-06	kilogram	cutoff36		GLO	technosphere
Activity	sawing, softwood, CF = -1
comment
location	CH
production amount	1
unit	kilogram
Exchanges
name	reference product	amount	unit	database	categories	location	type	Comment
sawing, softwood, CF = -1	slab and siding, softwood, wet, measured as dry mass, CF = -1	1	kilogram	Elegancy		CH	production
market for diesel, burned in building machine	diesel, burned in building machine	0.00924672	megajoule	cutoff36		GLO	technosphere
market for electricity, medium voltage	electricity, medium voltage	0.00618345	kilowatt hour	cutoff36		CH	technosphere
market for lubricating oil	lubricating oil	3.36365e-05	kilogram	cutoff36		RER	technosphere
market for sawlog and veneer log, softwood, measured as solid wood under bark, CF = -1	sawlog and veneer log, softwood, measured as solid wood under bark, CF = -1	0.00051555	cubic meter	cutoff36		CH	technosphere
sawmill construction	sawmill	6.88448e-11	unit	cutoff36		CH	technosphere
market for waste mineral oil	waste mineral oil	-5.02975e-06	kilogram	cutoff36		CH	technosphere
Activity	sawing, hardwood, CF = -1
comment
location	CH
production amount	1
unit	kilogram
Exchanges
name	reference product	amount	unit	database	categories	location	type	Comment
sawing, hardwood, CF = -1	slab and siding, hardwood, wet, measured as dry mass, CF = -1	1	kilogram	Elegancy		CH	production
market for electricity, medium voltage	electricity, medium voltage	0.00563002	kilowatt hour	cutoff36		CH	technosphere
market for lubricating oil	lubricating oil	2.8269e-05	kilogram	cutoff36		RER	technosphere
sawmill construction	sawmill	5.7859e-11	unit	cutoff36		CH	technosphere
market for sawlog and veneer log, hardwood, measured as solid wood under bark, CF = -1	sawlog and veneer log, hardwood, measured as solid wood under bark, CF = -1	0.000433282	cubic meter	cutoff36		CH	technosphere
market for waste mineral oil	waste mineral oil	-4.22714e-06	kilogram	cutoff36		CH	technosphere
market for diesel, burned in building machine	diesel, burned in building machine	0.00777119	megajoule	cutoff36		GLO	technosphere
Activity	market for sawlog and veneer log, softwood, measured as solid wood under bark, CF = -1
comment
location	CH
production amount	1
unit	cubic meter
Exchanges
name	reference product	amount	unit	database	categories	location	type	Comment
market for sawlog and veneer log, softwood, measured as solid wood under bark, CF = -1	sawlog and veneer log, softwood, measured as solid wood under bark, CF = -1	1	cubic meter	Elegancy		CH	production	Product
market for transport, freight, lorry, unspecified	transport, freight, lorry, unspecified	20.1813	ton kilometer	cutoff36		RER	technosphere
softwood forestry, mixed species, sustainable forest management, CF = -1	sawlog and veneer log, softwood, measured as solid wood under bark, CF = -1	1	cubic meter	cutoff36		CH	technosphere
Activity	market for sawlog and veneer log, hardwood, measured as solid wood under bark, CF = -1
comment
location	CH
production amount	1
unit	cubic meter
Exchanges
name	reference product	amount	unit	database	categories	location	type	Comment
market for sawlog and veneer log, hardwood, measured as solid wood under bark, CF = -1	sawlog and veneer log, hardwood, measured as solid wood under bark, CF = -1	1	cubic meter	Elegancy		CH	production	Product
market for transport, freight, lorry, unspecified	transport, freight, lorry, unspecified	30.507	ton kilometer	cutoff36		RER	technosphere
hardwood forestry, mixed species, sustainable forest management, CF = -1	sawlog and veneer log, hardwood, measured as solid wood under bark, CF = -1	1	cubic meter	cutoff36		CH	technosphere
Activity	softwood forestry, mixed species, sustainable forest management, CF = -1
comment
location	CH
production amount	1
unit	cubic meter
Exchanges
name	reference product	amount	unit	database	categories	location	type	Comment
softwood forestry, mixed species, sustainable forest management, CF = -1	sawlog and veneer log, softwood, measured as solid wood under bark, CF = -1	1	cubic meter	Elegancy		CH	production	Product
delimbing, with excavator-based processor	delimbing/sorting, excavator-based processor	0.00921	hour	cutoff36		RER	technosphere
forwarding, forwarder	forwarding, forwarder	0.0107	hour	cutoff36		RER	technosphere
harvesting, forestry harvester	harvesting, forestry harvester	0.00804	hour	cutoff36		RER	technosphere
market for diesel, burned in building machine	diesel, burned in building machine	1.74275	megajoule	cutoff36		GLO	technosphere
market for gravel, crushed	gravel, crushed	40.5291	kilogram	cutoff36		CH	technosphere
market for transport, helicopter	transport, helicopter	0.00129	hour	cutoff36		GLO	technosphere
power sawing, without catalytic converter	power sawing, without catalytic converter	0.626362	hour	cutoff36		RER	technosphere
skidding, skidder	skidding, skidder	0.0762	hour	cutoff36		RER	technosphere
yarding and processing, mobile cable yarder on truck	cable yarding	0.00336	hour	cutoff36		RER	technosphere
yarding, mobile cable yarder on trailer	cable yarding	0.00818	hour	cutoff36		RER	technosphere
yarding, sled yarder	cable yarding	0.00151	hour	cutoff36		RER	technosphere
Occupation, traffic area, rail/road embankment		16.2128	square meter-year	biosphere3	natural resource::land		biosphere
Occupation, forest, extensive		910.674	square meter-year	biosphere3	natural resource::land		biosphere
Transformation, from forest, extensive		7.00518	square meter	biosphere3	natural resource::land		biosphere
Transformation, to traffic area, rail/road embankment		0.124714	square meter	biosphere3	natural resource::land		biosphere
Transformation, from traffic area, rail/road embankment		0.124714	square meter	biosphere3	natural resource::land		biosphere
Carbon dioxide, to soil or biomass stock		796.987	kilogram	biosphere3	soil		biosphere	Changed from "Carbon dioxide, in air - natural resource - in air". The carbon content of the wood amounts to 0.494 kgC/kg wood (measured as dry mass)
Wood, soft, standing		1	cubic meter	biosphere3	natural resource::biotic		biosphere
Energy, gross calorific value, in biomass		8976	megajoule	biosphere3	natural resource::biotic		biosphere
Transformation, to forest, extensive		7.00518	square meter	biosphere3	natural resource::land		biosphere
Activity	hardwood forestry, mixed species, sustainable forest management, CF = -1
comment
location	CH
production amount	1
unit	cubic meter
Exchanges
name	reference product	amount	unit	database	categories	location	type	Comment
hardwood forestry, mixed species, sustainable forest management, CF = -1	sawlog and veneer log, hardwood, measured as solid wood under bark, CF = -1	1	cubic meter	Elegancy		CH	production	Product
delimbing, with excavator-based processor	delimbing/sorting, excavator-based processor	0.0049	hour	cutoff36		RER	technosphere
forwarding, forwarder	forwarding, forwarder	0.0195	hour	cutoff36		RER	technosphere
harvesting, forestry harvester	harvesting, forestry harvester	0.0156	hour	cutoff36		RER	technosphere
market for diesel, burned in building machine	diesel, burned in building machine	2.1214	megajoule	cutoff36		GLO	technosphere
market for gravel, crushed	gravel, crushed	49.3348	kilogram	cutoff36		CH	technosphere
market for transport, helicopter	transport, helicopter	0.000456	hour	cutoff36		GLO	technosphere
power sawing, without catalytic converter	power sawing, without catalytic converter	0.38578	hour	cutoff36		RER	technosphere
skidding, skidder	skidding, skidder	0.0749	hour	cutoff36		RER	technosphere
yarding and processing, mobile cable yarder on truck	cable yarding	0.00268	hour	cutoff36		RER	technosphere
yarding, mobile cable yarder on trailer	cable yarding	0.00562	hour	cutoff36		RER	technosphere
yarding, sled yarder	cable yarding	7.5e-05	hour	cutoff36		RER	technosphere
Occupation, traffic area, rail/road embankment		19.7354	square meter-year	biosphere3	natural resource::land		biosphere
Carbon dioxide, to soil or biomass stock		1133.49	kilogram	biosphere3	soil		biosphere	Changed from "Carbon dioxide, in air - natural resource - in air". The carbon content of the wood amounts to 0.494 kgC/kg wood (measured as dry mass)
Energy, gross calorific value, in biomass		12265.2	megajoule	biosphere3	natural resource::biotic		biosphere
Occupation, forest, extensive		1108.54	square meter-year	biosphere3	natural resource::land		biosphere
Transformation, from forest, extensive		8.5272	square meter	biosphere3	natural resource::land		biosphere
Transformation, from traffic area, rail/road embankment		0.151811	square meter	biosphere3	natural resource::land		biosphere
Transformation, to forest, extensive		8.5272	square meter	biosphere3	natural resource::land		biosphere
Transformation, to traffic area, rail/road embankment		0.151811	square meter	biosphere3	natural resource::land		biosphere
Wood, hard, standing		1	cubic meter	biosphere3	natural resource::biotic		biosphere
Activity	softwood forestry, pine, sustainable forest management_CF = -1
comment
location	SE
production amount	1
reference product	wood chips, wet, measured as dry mass_CF = -1
type	process
unit	kilogram
Exchanges
name	reference product	amount	location	unit	categories	type	comment	database
Carbon dioxide, to soil or biomass stock		1.81133		kilogram	soil	biosphere		biosphere3
Energy, gross calorific value, in biomass		20.4		megajoule	natural resource::biotic	biosphere	Energy content of wood	biosphere3
Occupation, forest, intensive		3.81799		square meter-year	natural resource::land	biosphere	Area occupied for the production of wood over one rotation period	biosphere3
Occupation, traffic area, rail/road embankment		0.0145252		square meter-year	natural resource::land	biosphere	Area occupied by forest roads over one roation period	biosphere3
Transformation, from forest, intensive		0.0477249		square meter	natural resource::land	biosphere	Area of forest, excluding forest roads per ha	biosphere3
Transformation, from traffic area, rail/road embankment		0.000181566		square meter	natural resource::land	biosphere	Area of forest roads per ha	biosphere3
Transformation, to forest, intensive		0.0477249		square meter	natural resource::land	biosphere	no comment	biosphere3
Transformation, to traffic area, rail/road embankment		0.000181566		square meter	natural resource::land	biosphere	no comment	biosphere3
Wood, soft, standing		0.00204082		cubic meter	natural resource::biotic	biosphere	Resource input, referring to wood under bark	biosphere3
softwood forestry, pine, sustainable forest management_CF = -1	wood chips, wet, measured as dry mass_CF = -1	1	SE	kilogram		production	average composition of 1 m3 solid wood under bark, harvested in Sweden; see general comment for details; calculated as the share of wood fuel from the total amount of wood harvested, of which a share is chips, converted from wet volume to dry matter via basic wood density, including the percentage of bark (as share of wood fuel relates to 1 m3 under bark)	Elegancy
forwarding, forwarder	forwarding, forwarder	9.83474e-05	RER	hour		technosphere	average input per m3; see general comment for details; covers the forwarding of stemwood, the forwarding of chips chipped in the stand as well as bundles of energy wood plus mechanical site preparation	cutoff36
harvesting, forestry harvester	harvesting, forestry harvester	0.000199796	RER	hour		technosphere	average input per m3; see general comment for details	cutoff36
market for diesel, burned in building machine	diesel, burned in building machine	0.0321562	GLO	megajoule		technosphere	63.9 MJ diesel/m3 of wood for distribution of gravel for maintenance construction of forest roads over rotation period PLUS diesel for planting activities, productivity 500 seedlings/PMH, diesel consumption 7l/PMH, converted to MJ	cutoff36
market for gravel, crushed	gravel, crushed	0.019062	RoW	kilogram		technosphere	3979 kg gravel /ha of wood for maintenance and construction of forest roads over rotation period	cutoff36
power sawing, without catalytic converter	power sawing, without catalytic converter	0.000216421	RER	hour		technosphere	average input per m3 covering hand-held gasoline-driven equipment used for site preparation, tending and pruning (attributing per ha values to total amount of wood harvested) as well as the amount of power sawing per harvested m3; see general comment for details	cutoff36
skidding, skidder	skidding, skidder	2.43114e-06	RER	hour		technosphere	average input per m3; see general comment for details	cutoff36
tree seedling production, in heated greenhouse	tree seedling, for planting	0.00680655	RER	unit		technosphere	calculated as 29.6% of the seedlings coming from heated greenhouses in Sweden	cutoff36
tree seedling production, in unheated greenhouse	tree seedling, for planting	0.0161886	RER	unit		technosphere	calculated as 29.6% of the seedlings coming from heated greenhouses in Sweden	cutoff36
wood chipping, mobile chipper, at forest road	wood chipping, chipper, mobile, diesel, at forest road	4.81061e-05	RER	hour		technosphere	no comment	cutoff36
wood chipping, terrain chipper, diesel	wood chipping, forwarder with terrain chipper, in forest	2.88312e-05	RER	hour		technosphere	no comment	cutoff36
Activity	softwood forestry, spruce, sustainable forest management_CF = -1
comment
location	DE
production amount	1
reference product	wood chips, wet, measured as dry mass_CF = -1
type	process
unit	kilogram
Exchanges
name	reference product	amount	location	unit	categories	type	comment	database
Carbon dioxide, to soil or biomass stock		1.81133		kilogram	soil	biosphere		biosphere3
Energy, gross calorific value, in biomass		20.4		megajoule	natural resource::biotic	biosphere	Energy content of wood	biosphere3
Occupation, forest, intensive		2.32891		square meter-year	natural resource::land	biosphere	Area occupied for the production of wood over one rotation period	biosphere3
Occupation, traffic area, rail/road embankment		0.0514151		square meter-year	natural resource::land	biosphere	Area occupied by forest roads over one roation period	biosphere3
Transformation, from forest, intensive		0.0232891		square meter	natural resource::land	biosphere	Area of forest, excluding forest roads per ha	biosphere3
Transformation, from traffic area, rail/road embankment		0.000514151		square meter	natural resource::land	biosphere	Area of forest roads per ha	biosphere3
Transformation, to forest, intensive		0.0232891		square meter	natural resource::land	biosphere	no comment	biosphere3
Transformation, to traffic area, rail/road embankment		0.000514151		square meter	natural resource::land	biosphere	no comment	biosphere3
Wood, soft, standing		0.00232558		cubic meter	natural resource::biotic	biosphere	Resource input, referring to wood under bark	biosphere3
softwood forestry, spruce, sustainable forest management_CF = -1	wood chips, wet, measured as dry mass_CF = -1	1	DE	kilogram		production	Average composition of 1 m3 solid wood under bark, harvested in Germany; see general comment for details; calculated as the share of wood fuel from the total amount of wood harvested, of which a share is chips, converted from wet volume to dry matter via basic wood density, including the percentage of bark (as share of wood fuel relates to 1 m3 under bark)	Elegancy
forwarding, forwarder	forwarding, forwarder	5.24212e-05	RER	hour		technosphere	average input per m3; see general comment for details; covers the forwarding of stemwood PLUS the forwarding of chips chipped in the stand	cutoff36
harvesting, forestry harvester	harvesting, forestry harvester	3.86047e-05	RER	hour		technosphere	average input per m3; see general comment for details	cutoff36
market for diesel, burned in building machine	diesel, burned in building machine	0.0204269	GLO	megajoule		technosphere	for distribution of gravel for maintenance of forest road over rotation period PLUS diesel for planting activities, productivity 500 seedlings/PMH, diesel consumption 7l/PMH, converted to MJ PLUS the diesel consumption used in mechanical clearing (1 intervention, 15 PMH per ha, 6 l/PMH, converted to MJ); for the amounts of gravel and tree seedlngs from heated/unheated greenhouses, see values of r…	cutoff36
market for gravel, crushed	gravel, crushed	0.164528	RoW	kilogram		technosphere	gravel for maintenance of forest road over rotation period; amount of gravel, see value of respective exchange	cutoff36
power sawing, without catalytic converter	power sawing, without catalytic converter	0.00110391	RER	hour		technosphere	average input per m3 covering hand-held gasoline-driven equipment used for site preparation, tending and pruning (attributing per ha values to total amount of wood harvested) as well as the amount of power sawing per harvested m3 of stemwood; see general comment for details	cutoff36
skidding, skidder	skidding, skidder	0.000168879	RER	hour		technosphere	average input per m3; see general comment for details	cutoff36
tree seedling production, in unheated greenhouse	tree seedling, for planting	0.00714099	RER	unit		technosphere	calculated as 100% of the seedlings coming from unheated greenhouses in Germany	cutoff36
wood chipping, mobile chipper, at forest road	wood chipping, chipper, mobile, diesel, at forest road	6.04299e-05	RER	hour		technosphere	no comment	cutoff36
wood chipping, terrain chipper, diesel	wood chipping, forwarder with terrain chipper, in forest	5.91966e-06	RER	hour		technosphere	no comment	cutoff36
Activity	hardwood forestry, birch, sustainable forest management_CF = -1
comment
location	SE
production amount	1
reference product	wood chips, wet, measured as dry mass_CF = -1
type	process
unit	kilogram
Exchanges
name	reference product	amount	location	unit	categories	type	comment	database
Carbon dioxide, to soil or biomass stock		1.81133		kilogram	soil	biosphere		biosphere3
Energy, gross calorific value, in biomass		19.6		megajoule	natural resource::biotic	biosphere	Energy content of wood	biosphere3
Occupation, forest, intensive		1.9721		square meter-year	natural resource::land	biosphere	Area occupied for the production of wood over one rotation period	biosphere3
Occupation, traffic area, rail/road embankment		0.00750269		square meter-year	natural resource::land	biosphere	Area occupied by forest roads over one roation period	biosphere3
Transformation, from forest, intensive		0.0328683		square meter	natural resource::land	biosphere	Area of forest, excluding forest roads per ha	biosphere3
Transformation, from traffic area, rail/road embankment		0.000125045		square meter	natural resource::land	biosphere	Area of forest roads per ha	biosphere3
Transformation, to forest, intensive		0.0328683		square meter	natural resource::land	biosphere	no comment	biosphere3
Transformation, to traffic area, rail/road embankment		0.000125045		square meter	natural resource::land	biosphere	no comment	biosphere3
Wood, hard, standing		0.00160348		cubic meter	natural resource::biotic	biosphere	Resource input, referring to wood under bark	biosphere3
hardwood forestry, birch, sustainable forest management_CF = -1	wood chips, wet, measured as dry mass_CF = -1	1	SE	kilogram		production	average composition of 1 m3 solid wood under bark, harvested in Sweden; see general comment for details; calculated as the share of wood fuel from the total amount of wood harvested, of which a share is chips, converted from wet volume to dry matter via basic wood density, including the percentage of bark (as share of wood fuel relates to 1 m3 under bark)	Elegancy
forwarding, forwarder	forwarding, forwarder	7.6271e-05	RER	hour		technosphere	average input per m3; see general comment for details; covers the forwarding of stemwood, the forwarding of chips chipped in the stand as well as bundles of energy wood plus mechanical site preparation	cutoff36
harvesting, forestry harvester	harvesting, forestry harvester	0.00015698	RER	hour		technosphere	average input per m3; see general comment for details	cutoff36
market for diesel, burned in building machine	diesel, burned in building machine	0.0126326	GLO	megajoule		technosphere	63.9 MJ diesel/m3 of wood for distribution of gravel for maintenance construction of forest roads over rotation period PLUS diesel for planting activities, productivity 500 seedlings/PMH, diesel consumption 7l/PMH, converted to MJ	cutoff36
market for gravel, crushed	gravel, crushed	0.0131281	RoW	kilogram		technosphere	3979 kg gravel /ha of wood for maintenance and construction of forest roads over rotation period	cutoff36
power sawing, without catalytic converter	power sawing, without catalytic converter	0.000199086	RER	hour		technosphere	average input per m3 covering hand-held gasoline-driven equipment used for site preparation, tending and pruning (attributing per ha values to total amount of wood harvested) as well as the amount of power sawing per harvested m3; see general comment for details	cutoff36
skidding, skidder	skidding, skidder	1.91016e-06	RER	hour		technosphere	average input per m3; see general comment for details	cutoff36
wood chipping, mobile chipper, at forest road	wood chipping, chipper, mobile, diesel, at forest road	3.69572e-05	RER	hour		technosphere	no comment	cutoff36
wood chipping, terrain chipper, diesel	wood chipping, forwarder with terrain chipper, in forest	2.21494e-05	RER	hour		technosphere	no comment	cutoff36
Activity	hardwood forestry, beech, sustainable forest management_CF = -1
comment
location	DE
production amount	1
reference product	wood chips, wet, measured as dry mass_CF = -1
type	process
unit	kilogram
Exchanges
name	reference product	amount	location	unit	categories	type	comment	database
Carbon dioxide, to soil or biomass stock		1.81133		kilogram	soil	biosphere		biosphere3
Energy, gross calorific value, in biomass		19.6		megajoule	natural resource::biotic	biosphere	Energy content of wood	biosphere3
Occupation, forest, intensive		2.77113		square meter-year	natural resource::land	biosphere	Area occupied for the production of wood over one rotation period	biosphere3
Occupation, traffic area, rail/road embankment		0.0611779		square meter-year	natural resource::land	biosphere	Area occupied by forest roads over one roation period	biosphere3
Transformation, from forest, intensive		0.0197938		square meter	natural resource::land	biosphere	Area of forest, excluding forest roads per ha	biosphere3
Transformation, from traffic area, rail/road embankment		0.000436985		square meter	natural resource::land	biosphere	Area of forest roads per ha	biosphere3
Transformation, to forest, intensive		0.0197938		square meter	natural resource::land	biosphere	no comment	biosphere3
Transformation, to traffic area, rail/road embankment		0.000436985		square meter	natural resource::land	biosphere	no comment	biosphere3
Wood, hard, standing		0.00166297		cubic meter	natural resource::biotic	biosphere	Resource input, referring to wood under bark	biosphere3
hardwood forestry, beech, sustainable forest management_CF = -1	wood chips, wet, measured as dry mass_CF = -1	1	DE	kilogram		production	average composition of 1 m3 solid wood under bark, harvested in Germany; see general comment for details	Elegancy
forwarding, forwarder	forwarding, forwarder	3.3056e-05	RER	hour		technosphere	average input per m3; see general comment for details; covers the forwarding of stemwood PLUS the forwarding of chips chipped in the stand	cutoff36
harvesting, forestry harvester	harvesting, forestry harvester	2.59424e-05	RER	hour		technosphere	average input per m3; see general comment for details	cutoff36
market for diesel, burned in building machine	diesel, burned in building machine	0.0230416	GLO	megajoule		technosphere	for distribution of gravel for maintenance of forest road over rotation period PLUS diesel for planting activities, productivity 500 seedlings/PMH, diesel consumption 7l/PMH, converted to MJ PLUS the diesel consumption used in mechanical clearing (1 intervention, 15 PMH per ha, 6 l/PMH, converted to MJ)	cutoff36
market for gravel, crushed	gravel, crushed	0.195769	RoW	kilogram		technosphere	gravel for maintenance of forest road over rotation period	cutoff36
power sawing, without catalytic converter	power sawing, without catalytic converter	0.00075628	RER	hour		technosphere	average input per m3 covering hand-held gasoline-driven equipment used for site preparation, tending and pruning (attributing per ha values to total amount of wood harvested) as well as the amount of power sawing per harvested m3 of stemwood; see general comment for details	cutoff36
skidding, skidder	skidding, skidder	0.000138851	RER	hour		technosphere	average input per m3; see general comment for details	cutoff36
tree seedling production, in unheated greenhouse	tree seedling, for planting	0.0161846	RER	unit		technosphere	calculated as 100% of the seedlings coming from unheated greenhouses in Germany	cutoff36
wood chipping, mobile chipper, at forest road	wood chipping, chipper, mobile, diesel, at forest road	4.22518e-05	RER	hour		technosphere	no comment	cutoff36
wood chipping, terrain chipper, diesel	wood chipping, forwarder with terrain chipper, in forest	4.13895e-06	RER	hour		technosphere	no comment	cutoff36
Activity	hardwood forestry, oak, sustainable forest management_CF = -1
comment
location	DE
production amount	1
reference product	wood chips, wet, measured as dry mass_CF = -1
type	process
unit	kilogram
Exchanges
name	reference product	amount	location	unit	categories	type	comment	database
Carbon dioxide, to soil or biomass stock		1.81133		kilogram	soil	biosphere		biosphere3
Energy, gross calorific value, in biomass		19.6		megajoule	natural resource::biotic	biosphere	Energy content of wood	biosphere3
Occupation, forest, intensive		2.69494		square meter-year	natural resource::land	biosphere	Area occupied for the production of wood over one rotation period	biosphere3
Occupation, traffic area, rail/road embankment		0.0594959		square meter-year	natural resource::land	biosphere	Area occupied by forest roads over one roation period	biosphere3
Transformation, from forest, intensive		0.0192496		square meter	natural resource::land	biosphere	Area of forest, excluding forest roads per ha	biosphere3
Transformation, from traffic area, rail/road embankment		0.000424971		square meter	natural resource::land	biosphere	Area of forest roads per ha	biosphere3
Transformation, to forest, intensive		0.0192496		square meter	natural resource::land	biosphere	no comment	biosphere3
Transformation, to traffic area, rail/road embankment		0.000424971		square meter	natural resource::land	biosphere	no comment	biosphere3
Wood, hard, standing		0.00160348		cubic meter	natural resource::biotic	biosphere	Resource input, referring to wood under bark	biosphere3
hardwood forestry, oak, sustainable forest management_CF = -1	wood chips, wet, measured as dry mass_CF = -1	1	DE	kilogram		production	average composition of 1 m3 solid wood under bark, harvested in Germany; see general comment for details	Elegancy
forwarding, forwarder	forwarding, forwarder	5.27731e-05	RER	hour		technosphere	average input per m3; see general comment for details; covers the forwarding of stemwood PLUS the forwarding of chips chipped in the stand	cutoff36
harvesting, forestry harvester	harvesting, forestry harvester	4.21715e-05	RER	hour		technosphere	average input per m3; see general comment for details	cutoff36
market for diesel, burned in building machine	diesel, burned in building machine	0.0243792	GLO	megajoule		technosphere	for distribution of gravel for maintenance of forest road over rotation period PLUS diesel for planting activities, productivity 500 seedlings/PMH, diesel consumption 7l/PMH, converted to MJ PLUS the diesel consumption used in mechanical clearing (1 intervention, 15 PMH per ha, 6 l/PMH, converted to MJ)	cutoff36
market for gravel, crushed	gravel, crushed	0.190387	RoW	kilogram		technosphere	gravel for maintenance of forest road over rotation period	cutoff36
power sawing, without catalytic converter	power sawing, without catalytic converter	0.000601934	RER	hour		technosphere	average input per m3 covering hand-held gasoline-driven equipment used for site preparation, tending and pruning (attributing per ha values to total amount of wood harvested) as well as the amount of power sawing per harvested m3 of stemwood; see general comment for details	cutoff36
skidding, skidder	skidding, skidder	0.000105756	RER	hour		technosphere	average input per m3; see general comment for details	cutoff36
tree seedling production, in unheated greenhouse	tree seedling, for planting	0.0196746	RER	unit		technosphere	calculated as 100% of the seedlings coming from unheated greenhouses in Germany	cutoff36
wood chipping, mobile chipper, at forest road	wood chipping, chipper, mobile, diesel, at forest road	4.07402e-05	RER	hour		technosphere	no comment	cutoff36
wood chipping, terrain chipper, diesel	wood chipping, forwarder with terrain chipper, in forest	3.99088e-06	RER	hour		technosphere	no comment	cutoff36
Activity	market for wood chips, wet, measured as dry mass, CF = -1
comment	Specific regional consumption mixes for wood chips, wet are needed as this product is consumed normally not far from where it is produced.
location	DE
production amount	1
reference product	wood chips, wet, measured as dry mass, CF = -1
type	process
unit	kilogram
Exchanges
name	reference product	amount	location	unit	type	comment	database
market for wood chips, wet, measured as dry mass, CF = -1	wood chips, wet, measured as dry mass, CF = -1	1	DE	kilogram	production		Elegancy
hardwood forestry, beech, sustainable forest management_CF = -1	0	0.501561	DE	kilogram	technosphere		Elegancy
hardwood forestry, oak, sustainable forest management_CF = -1	0	0.0982595	DE	kilogram	technosphere		Elegancy
market for transport, freight, lorry, unspecified	transport, freight, lorry, unspecified	0.18	RER	ton kilometer	technosphere	Wood as a raw material is mostly transported in short to medium (50-100km) distances. Road transport is therefore dominating. (Identification of existing transport methods and alternative methods or new approaches with data about costs, labour input and energy consumption, E. Le Net, et al., EFI Technical Report 76, 2011). An average distance of 75 km has been considered. The factor "dry mass/wet…	cutoff36
softwood forestry, pine, sustainable forest management_CF = -1	0	0.152942	DE	kilogram	technosphere		Elegancy
softwood forestry, spruce, sustainable forest management_CF = -1	0	0.247237	DE	kilogram	technosphere		Elegancy
Activity	softwood forestry, spruce, sustainable forest management_CF = -1
comment
location	SE
production amount	1
reference product	wood chips, wet, measured as dry mass_CF = -1
type	process
unit	kilogram
Exchanges
name	reference product	amount	location	unit	categories	type	comment	database
Carbon dioxide, to soil or biomass stock		1.81133		kilogram	soil	biosphere		biosphere3
Energy, gross calorific value, in biomass		20.4		megajoule	natural resource::biotic	biosphere	Energy content of wood	biosphere3
Occupation, forest, intensive		3.41958		square meter-year	natural resource::land	biosphere	Area occupied for the production of wood over one rotation period	biosphere3
Occupation, traffic area, rail/road embankment		0.0130095		square meter-year	natural resource::land	biosphere	Area occupied by forest roads over one roation period	biosphere3
Transformation, from forest, intensive		0.0427448		square meter	natural resource::land	biosphere	Area of forest, excluding forest roads per ha	biosphere3
Transformation, from traffic area, rail/road embankment		0.000162619		square meter	natural resource::land	biosphere	Area of forest roads per ha	biosphere3
Transformation, to forest, intensive		0.0427448		square meter	natural resource::land	biosphere	no comment	biosphere3
Transformation, to traffic area, rail/road embankment		0.000162619		square meter	natural resource::land	biosphere	no comment	biosphere3
Wood, soft, standing		0.00232558		cubic meter	natural resource::biotic	biosphere	Resource input, referring to wood under bark	biosphere3
softwood forestry, spruce, sustainable forest management_CF = -1	wood chips, wet, measured as dry mass_CF = -1	1	SE	kilogram		production	average composition of 1 m3 solid wood under bark, harvested in Sweden; see general comment for details; calculated as the share of wood fuel from the total amount of wood harvested, of which a share is chips, converted from wet volume to dry matter via basic wood density, including the percentage of bark (as share of wood fuel relates to 1 m3 under bark)	Elegancy
forwarding, forwarder	forwarding, forwarder	0.000109944	RER	hour		technosphere	average input per m3; see general comment for details; covers the forwarding of stemwood, the forwarding of chips chipped in the stand as well as bundles of energy wood plus mechanical site preparation	cutoff36
harvesting, forestry harvester	harvesting, forestry harvester	0.000227674	RER	hour		technosphere	average input per m3; see general comment for details	cutoff36
market for diesel, burned in building machine	diesel, burned in building machine	0.024932	GLO	megajoule		technosphere	63.9 MJ diesel/m3 of wood for distribution of gravel for maintenance construction of forest roads over rotation period PLUS diesel for planting activities, productivity 500 seedlings/PMH, diesel consumption 7l/PMH, converted to MJ	cutoff36
market for gravel, crushed	gravel, crushed	0.0170729	RoW	kilogram		technosphere	3979 kg gravel /ha of wood for maintenance and construction of forest roads over rotation period	cutoff36
power sawing, without catalytic converter	power sawing, without catalytic converter	0.00013085	RER	hour		technosphere	average input per m3 covering hand-held gasoline-driven equipment used for site preparation, tending and pruning (attributing per ha values to total amount of wood harvested) as well as the amount of power sawing per harvested m3; see general comment for details	cutoff36
skidding, skidder	skidding, skidder	2.77037e-06	RER	hour		technosphere	average input per m3; see general comment for details	cutoff36
tree seedling production, in heated greenhouse	tree seedling, for planting	0.00381018	RER	unit		technosphere	calculated as 29.6% of the seedlings coming from heated greenhouses in Sweden	cutoff36
tree seedling production, in unheated greenhouse	tree seedling, for planting	0.00906204	RER	unit		technosphere	calculated as 29.6% of the seedlings coming from heated greenhouses in Sweden	cutoff36
wood chipping, mobile chipper, at forest road	wood chipping, chipper, mobile, diesel, at forest road	5.48185e-05	RER	hour		technosphere	no comment	cutoff36
wood chipping, terrain chipper, diesel	wood chipping, forwarder with terrain chipper, in forest	3.28541e-05	RER	hour		technosphere	no comment	cutoff36
Activity	softwood forestry, pine, sustainable forest management_CF = -1
comment
location	DE
production amount	1
reference product	wood chips, wet, measured as dry mass_CF = -1
type	process
unit	kilogram
Exchanges
name	reference product	amount	location	unit	categories	type	comment	database
Carbon dioxide, to soil or biomass stock		1.81133		kilogram	soil	biosphere		biosphere3
Energy, gross calorific value, in biomass		20.4		megajoule	natural resource::biotic	biosphere	Energy content of wood	biosphere3
Occupation, forest, intensive		3.1199		square meter-year	natural resource::land	biosphere	Area occupied for the production of wood over one rotation period	biosphere3
Occupation, traffic area, rail/road embankment		0.0688776		square meter-year	natural resource::land	biosphere	Area occupied by forest roads over one roation period	biosphere3
Transformation, from forest, intensive		0.0259991		square meter	natural resource::land	biosphere	Area of forest, excluding forest roads per ha	biosphere3
Transformation, from traffic area, rail/road embankment		0.00057398		square meter	natural resource::land	biosphere	Area of forest roads per ha	biosphere3
Transformation, to forest, intensive		0.0259991		square meter	natural resource::land	biosphere	no comment	biosphere3
Transformation, to traffic area, rail/road embankment		0.00057398		square meter	natural resource::land	biosphere	no comment	biosphere3
Wood, soft, standing		0.00204082		cubic meter	natural resource::biotic	biosphere	Resource input, referring to wood under bark	biosphere3
softwood forestry, pine, sustainable forest management_CF = -1	wood chips, wet, measured as dry mass_CF = -1	1	DE	kilogram		production	average composition of 1 m3 solid wood under bark, harvested in Germany; see general comment for details	Elegancy
forwarding, forwarder	forwarding, forwarder	5.36023e-05	RER	hour		technosphere	average input per m3; see general comment for details; covers the forwarding of stemwood PLUS the forwarding of chips chipped in the stand	cutoff36
harvesting, forestry harvester	harvesting, forestry harvester	3.97959e-05	RER	hour		technosphere	average input per m3; see general comment for details	cutoff36
market for diesel, burned in building machine	diesel, burned in building machine	0.0286856	GLO	megajoule		technosphere	for distribution of gravel for maintenance of forest road over rotation period PLUS diesel for planting activities, productivity 500 seedlings/PMH, diesel consumption 7l/PMH, converted to MJ PLUS the diesel consumption used in mechanical clearing (1 intervention, 15 PMH per ha, 6 l/PMH, converted to MJ)	cutoff36
market for gravel, crushed	gravel, crushed	0.220408	RoW	kilogram		technosphere	gravel for maintenance of forest road over rotation period; amount of gravel, see value of respective exchange	cutoff36
power sawing, without catalytic converter	power sawing, without catalytic converter	0.000945493	RER	hour		technosphere	average input per m3 covering hand-held gasoline-driven equipment used for site preparation, tending and pruning (attributing per ha values to total amount of wood harvested) as well as the amount of power sawing per harvested m3 of stemwood; see general comment for details	cutoff36
skidding, skidder	skidding, skidder	0.0001354	RER	hour		technosphere	average input per m3; see general comment for details	cutoff36
tree seedling production, in unheated greenhouse	tree seedling, for planting	0.0212585	RER	unit		technosphere	calculated as 100% of the seedlings coming from unheated greenhouses in Germany	cutoff36
wood chipping, mobile chipper, at forest road	wood chipping, chipper, mobile, diesel, at forest road	5.30303e-05	RER	hour		technosphere	no comment	cutoff36
wood chipping, terrain chipper, diesel	wood chipping, forwarder with terrain chipper, in forest	5.19481e-06	RER	hour		technosphere	no comment	cutoff36
Activity	market for wood chips, wet, measured as dry mass, CF = -1
comment	Specific regional consumption mixes for wood chips, wet are needed as this product is consumed normally not far from where it is produced.
location	SE
production amount	1
reference product	wood chips, wet, measured as dry mass, CF = -1
type	process
unit	kilogram
Exchanges
name	reference product	amount	location	unit	type	comment	database
market for wood chips, wet, measured as dry mass, CF = -1	wood chips, wet, measured as dry mass, CF = -1	1	SE	kilogram	production		Elegancy
hardwood forestry, birch, sustainable forest management_CF = -1	0	0.549462	SE	kilogram	technosphere		Elegancy
market for transport, freight, lorry, unspecified	transport, freight, lorry, unspecified	0.18	RER	ton kilometer	technosphere	Wood as a raw material is mostly transported in short to medium (50-100km) distances. Road transport is therefore dominating. (Identification of existing transport methods and alternative methods or new approaches with data about costs, labour input and energy consumption, E. Le Net, et al., EFI Technical Report 76, 2011). An average distance of 75 km has been considered. The factor "dry mass/wet…	cutoff36
softwood forestry, pine, sustainable forest management_CF = -1	0	0.216192	SE	kilogram	technosphere		Elegancy
softwood forestry, spruce, sustainable forest management_CF = -1	0	0.234346	SE	kilogram	technosphere		Elegancy
Activity	market for wood chips, wet, measured as dry mass, CF = -1
comment	Specific regional consumption mixes for wood chips, wet are needed as this product is consumed normally not far from where it is produced.
location	Europe without Switzerland
production amount	1
reference product	wood chips, wet, measured as dry mass, CF = -1
type	process
unit	kilogram
Exchanges
name	reference product	amount	location	unit	type	comment	database
market for wood chips, wet, measured as dry mass, CF = -1	0	1	Europe without Switzerland	kilogram	production		Elegancy
hardwood forestry, beech, sustainable forest management_CF = -1	0	0.137466	DE	kilogram	technosphere		Elegancy
hardwood forestry, birch, sustainable forest management_CF = -1	0	0.398867	SE	kilogram	technosphere		Elegancy
hardwood forestry, oak, sustainable forest management_CF = -1	0	0.0269307	DE	kilogram	technosphere		Elegancy
market for transport, freight, lorry, unspecified	transport, freight, lorry, unspecified	0.18	RER	ton kilometer	technosphere	Wood as a raw material is mostly transported in short to medium (50-100km) distances. Road transport is therefore dominating. (Identification of existing transport methods and alternative methods or new approaches with data about costs, labour input and energy consumption, E. Le Net, et al., EFI Technical Report 76, 2011). An average distance of 75 km has been considered. The factor "dry mass/wet…	cutoff36
softwood forestry, pine, sustainable forest management_CF = -1	0	0.156939	SE	kilogram	technosphere		Elegancy
softwood forestry, pine, sustainable forest management_CF = -1	0	0.041918	DE	kilogram	technosphere		Elegancy
softwood forestry, spruce, sustainable forest management_CF = -1	0	0.170117	SE	kilogram	technosphere		Elegancy
softwood forestry, spruce, sustainable forest management_CF = -1	0	0.0677621	DE	kilogram	technosphere		Elegancy

## Sheet: DS creation_woody gas
	Input file for creation of datasets, hydrogen production via woody gasification
								Modelling the case for the Swiss wood chips market						Modelling the case for the European wood chips market						Modelling the case with hydropower instead of electricity from the ENTSO-E grid
								HPR + SMR + WGS	HPR + SMR + WGS + CCS	oxySER + SMR + WGS	oxySER + SMR + WGS + CCS	EF + HTLT- WGS	EF + HTLT- WGS + CCS	HPR + SMR + WGS, RER	HPR + SMR + WGS + CCS, RER	oxySER + SMR + WGS, RER	oxySER + SMR + WGS + CCS, RER	EF + HTLT- WGS, RER	EF + HTLT- WGS + CCS, RER	HPR + SMR + WGS, RER, hydro	HPR + SMR + WGS + CCS, RER, hydro	oxySER + SMR + WGS, RER, hydro	oxySER + SMR + WGS + CCS, RER, hydro	EF + HTLT- WGS, RER, hydro	EF + HTLT- WGS + CCS, RER, hydro	Comment
	name	reference product	database	categories	location	type	unit	amount	amount	amount	amount	amount	amount	amount	amount	amount	amount	amount	amount	amount	amount	amount	amount	amount	amount
	Total energy input to reformer+furnace							1.61983	1.61983	1.43109	1.43109	1.84221	1.84221	1.61983	1.61983	1.43109	1.43109	1.84221	1.84221	1.61983	1.61983	1.43109	1.43109	1.84221	1.84221	This is an output taken from the modellings in ASPEN PLUS.
	Hydrogen production, gaseous, 200 bar, from woody gasification	Hydrogen, gaseous, 200 bar	H2 from WGSF		RER	production	megajoule	1	1	1	1	1	1	1	1	1	1	1	1	1	1	1	0	1	1
	market for wood chips, wet, measured as dry mass, CF = -1	wood chips, wet, measured as dry mass, CF = -1	Elegancy		CH	technosphere	kilogram	0.085705	0.085705	0.0757192	0.0757192	0.0974716	0.0974716	0	0	0	0	0	0	0	0	0	0	0	0	This is an output taken from the modellings in ASPEN PLUS. The original dataset from ecoinvent has been changed to model Carbon dioxide uptake from the atmosphere with a characterisation factor CF = -1; and to ensure a correct carbon balance.
	market for wood chips, wet, measured as dry mass, CF = -1	wood chips, wet, measured as dry mass, CF = -1	cutoff36		Europe without Switzerland	technosphere	kilogram	0	0	0	0	0	0	0.085705	0.085705	0.0757192	0.0757192	0.0974716	0.0974716	0.085705	0.085705	0.0757192	0.0757192	0.0974716	0.0974716	This is an output taken from the modellings in ASPEN PLUS. The original dataset from ecoinvent has been changed to model Carbon dioxide uptake from the atmosphere with a characterisation factor CF = -1.
	market for electricity, low voltage	electricity, low voltage	cutoff36		CH	technosphere	kilowatt hour	0.0261521	0.0343069	0.0301397	0.0338528	0.0201779	0.0349443	0	0	0	0	0	0	0	0	0	0	0	0	This is an output taken from the modellings in ASPEN PLUS. A positive sign signifies that electricity from the market is used, while a negative sign indicates that electricity is fed back to the grid. The low voltage market has been chosen to include electricity from photovoltaics and municipal waste incineration.
	market group for electricity, high voltage	electricity, high voltage	cutoff36		ENTSO-E	technosphere	kilowatt hour	0	0	0	0	0	0	0.0261521	0.0343069	0.0301397	0.0338528	0.0201779	0.0349443	0	0	0	0	0	0	This is an output taken from the modellings in ASPEN PLUS. A positive sign signifies that electricity from the market is used, while a negative sign indicates that electricity is fed back to the grid.
	electricity production, hydro, reservoir, alpine region	electricity, high voltage	cutoff36		CH	technosphere	kilowatt hour	0	0	0	0	0	0	0	0	0	0	0	0	0.0261521	0.0343069	0.0301397	0.0338528	0.0201779	0.0349443	This is an output taken from the modellings in ASPEN PLUS. A positive sign signifies that electricity from the market is used, while a negative sign indicates that electricity is fed back to the grid.
	synthetic gas factory construction	synthetic gas factory	cutoff36		CH	technosphere	unit	4.45693e-12	4.45693e-12	4.45693e-12	4.45693e-12	4.45693e-12	4.45693e-12	0	0	0	0	0	0	0	0	0	0	0	0	Syngas factory infrastructure used as a proxy for the H2 production plant.
	synthetic gas factory construction	synthetic gas factory	cutoff36		RoW	technosphere	unit	0	0	0	0	0	0	4.45693e-12	4.45693e-12	4.45693e-12	4.45693e-12	4.45693e-12	4.45693e-12	4.45693e-12	4.45693e-12	4.45693e-12	4.45693e-12	4.45693e-12	4.45693e-12	Syngas factory infrastructure used as a proxy for the H2 production plant.
	CO2 storage and transport 200km pipeline, storage 1000m/2025	CO2 storage and transport 200km pipeline, storage 1000m/2025	Elegancy		RER	technosphere	kilogram	0	0.0890826	0.086226	0.126881	0	0.163213	0	0.0890826	0.086226	0.126881	0	0.163213	0	0.0890826	0.086226	0.126881	0	0.163213
	Carbon dioxide, from soil or biomass stock		biosphere3	air		biosphere	kilogram	0.155218	0.0661365	0.0505833	0.00992956	0.176639	0.0126979	0.155218	0.0661365	0.0505833	0.00992956	0.176639	0.0126979	0.155218	0.0661365	0.0505833	0.00992956	0.176639	0.0126979	This is an output taken from the modellings in ASPEN PLUS.
	market for liquid storage tank, chemicals, organics	liquid storage tank, chemicals, organics	cutoff36		GLO	technosphere	unit	2.1219e-11	2.1219e-11	2.1219e-11	2.1219e-11	2.1219e-11	2.1219e-11	2.1219e-11	2.1219e-11	2.1219e-11	2.1219e-11	2.1219e-11	2.1219e-11	2.1219e-11	2.1219e-11	2.1219e-11	2.1219e-11	2.1219e-11	2.1219e-11
	market for water, deionised	water, deionised	cutoff36		CH	technosphere	kilogram	0.13148	0.131482	0.0365048	0.0365025	0.132546	0.132719	0	0	0	0	0	0	0	0	0	0	0	0	This is an output taken from the modellings in ASPEN PLUS.
	market for water, deionised	water, deionised	cutoff36		Europe without Switzerland	technosphere	kilogram	0	0	0	0	0	0	0.13148	0.131482	0.0365048	0.0365025	0.132546	0.132719	0.13148	0.131482	0.0365048	0.0365025	0.132546	0.132719	This is an output taken from the modellings in ASPEN PLUS.
	treatment of wastewater, average, capacity 1E9l/year	wastewater, average	cutoff36		CH	technosphere	cubic meter	6.16488e-05	6.16506e-05	3.21273e-05	3.2128e-05	0.000103661	0.000103661	0	0	0	0	0	0	0	0	0	0	0	0	This is an output taken from the modellings in ASPEN PLUS.
	treatment of wastewater, average, capacity 1E9l/year	wastewater, average	cutoff36		Europe without Switzerland	technosphere	cubic meter	0	0	0	0	0	0	6.16488e-05	6.16506e-05	3.21273e-05	3.2128e-05	0.000103661	0.000103661	6.16488e-05	6.16506e-05	3.21273e-05	3.2128e-05	0.000103661	0.000103661	This is an output taken from the modellings in ASPEN PLUS.
	treatment of wood ash mixture, pure, municipal incineration with fly ash extraction	wood ash mixture, pure	cutoff36		CH	technosphere	kilogram	2.38462e-09	2.38462e-09	8.62356e-09	8.62356e-09	0	0	0	0	0	0	0	0	0	0	0	0	0	0	This is an output taken from the modellings in ASPEN PLUS.
	treatment of wood ash mixture, pure, municipal incineration	wood ash mixture, pure	cutoff36		Europe without Switzerland	technosphere	kilogram	0	0	0	0	0	0	2.38462e-09	2.38462e-09	8.62356e-09	8.62356e-09	0	0	2.38462e-09	2.38462e-09	8.62356e-09	8.62356e-09	0	0	This is an output taken from the modellings in ASPEN PLUS.
	Electricity consumption without compression (26 bar)						kWh/MJ	0.0157724	0.0239271	0.01976	0.023473	0.0114069	0.0261735
	Electricity consumption, compression						kWh/MJ	0.0103798	0.0103798	0.0103798	0.0103798	0.00877092	0.00877085
	Electricity consumption, 200 bar						kWh/MJ	0.0261521	0.0343069	0.0301397	0.0338528	0.0201779	0.0349443
	share compression, electricity consumption							0.396899	0.302556	0.344388	0.306615	0.434681	0.250995

## Sheet: GHG compression
Impact cat	('ILCD 2.0 2018 midpoint', 'climate change', 'climate change total')	kg CO2-eq/MJ H2 at given pressure (200 or 25 bar) and purity
Sum of Score	Column Labels
Row Labels	CO2 transport and storage	Direct CO2 emissions	Electricity from/to grid	Fuel supply chain	Plant infrastructure	Solid ashes disposal	Water supply	Grand Total	Difference = additional GHG emissions from compression
'EF + HTLT- WGS + CCS, RER' (megajoule, CH, None)	0.00067445	0.0126979	0.0141869	-0.170772	3.35547e-05		8.29181e-06	-0.143171	0.00356084
'EF + HTLT- WGS + CCS, RER, 25 bar' (megajoule, CH, None)	0.00067445	0.0126979	0.0106261	-0.170772	3.35547e-05		8.29181e-06	-0.146732
'EF + HTLT- WGS, RER' (megajoule, CH, None)		0.176639	0.00819192	-0.170772	3.35547e-05		8.21353e-06	0.0141002	0.00356087
'EF + HTLT- WGS, RER, 25 bar' (megajoule, CH, None)		0.176639	0.00463105	-0.170772	3.35547e-05		8.21353e-06	0.0105393
'HPR + SMR + WGS + CCS, RER' (megajoule, CH, None)	0.000368118	0.0661365	0.0139281	-0.150157	3.35547e-05	-3.95369e-11	2.87058e-05	-0.0696619	0.00421403
'HPR + SMR + WGS + CCS, RER, 25 bar' (megajoule, CH, None)	0.000368118	0.0661365	0.00971407	-0.150157	3.35547e-05	-3.95369e-11	2.87058e-05	-0.0738759
'HPR + SMR + WGS, RER' (megajoule, CH, None)		0.155218	0.0106174	-0.150157	3.35547e-05	-3.95369e-11	2.87059e-05	0.0157406	0.00421403
'HPR + SMR + WGS, RER, 25 bar' (megajoule, CH, None)		0.155218	0.00640335	-0.150157	3.35547e-05	-3.95369e-11	2.87059e-05	0.0115266
'oxySER + SMR + WGS, RER' (megajoule, CH, None)	0.000356314	0.0505833	0.0122363	-0.132662	3.35547e-05	-1.42978e-10	4.75901e-07	-0.0694517	I have not modelled the case at 25 bar for oxySER
'oxySER + SMR + WGS + CCS, RER' (megajoule, CH, None)	0.000524313	0.00992956	0.0137437	-0.132662	3.35547e-05	-1.42978e-10	4.74511e-07	-0.10843
Grand Total	0.00296576	0.881895	0.104279	-1.54904	0.000335547	-4.44104e-10	0.000148784	-0.559416

## Sheet: LCIA_H2production
Impact cat	Activity	Contribution cat	Score
('ILCD 2.0 2018 midpoint', 'climate change', 'climate change total')	'ATR BM, HT+LT, + CCS (VPSA), 98 (average), maximum C uptake' (megajoule, CH, None)	Fuel supply chain	-0.151384
('ILCD 2.0 2018 midpoint', 'climate change', 'climate change total')	'ATR BM, HT+LT, + CCS (VPSA), 98 (average), maximum C uptake' (megajoule, CH, None)	Plant infrastructure	0.000631278
('ILCD 2.0 2018 midpoint', 'climate change', 'climate change total')	'ATR BM, HT+LT, + CCS (VPSA), 98 (average), maximum C uptake' (megajoule, CH, None)	Electricity from/to grid	0.00526943
('ILCD 2.0 2018 midpoint', 'climate change', 'climate change total')	'ATR BM, HT+LT, + CCS (VPSA), 98 (average), maximum C uptake' (megajoule, CH, None)	Water supply	2.27992e-05
('ILCD 2.0 2018 midpoint', 'climate change', 'climate change total')	'ATR BM, HT+LT, + CCS (VPSA), 98 (average), maximum C uptake' (megajoule, CH, None)	Catalysts&adsorbents	9.12173e-05
('ILCD 2.0 2018 midpoint', 'climate change', 'climate change total')	'ATR BM, HT+LT, + CCS (VPSA), 98 (average), maximum C uptake' (megajoule, CH, None)	CO2 transport and storage	0.000293554
('ILCD 2.0 2018 midpoint', 'climate change', 'climate change total')	'ATR BM, HT+LT, + CCS (VPSA), 98 (average), maximum C uptake' (megajoule, CH, None)	Direct CO2 emissions	0.0014239
('ILCD 2.0 2018 midpoint', 'climate change', 'climate change total')	'ATR BM, HT+LT, + CCS (VPSA), 98 (average), maximum C uptake' (megajoule, CH, None)	Emissions from fuel burning in furnace	0
('ILCD 2.0 2018 midpoint', 'climate change', 'climate change total')	'ATR BM, HT+LT, + CCS (MDEA), 98 (upper bound)' (megajoule, CH, None)	Fuel supply chain	-0.105252
('ILCD 2.0 2018 midpoint', 'climate change', 'climate change total')	'ATR BM, HT+LT, + CCS (MDEA), 98 (upper bound)' (megajoule, CH, None)	Plant infrastructure	0.000631279
('ILCD 2.0 2018 midpoint', 'climate change', 'climate change total')	'ATR BM, HT+LT, + CCS (MDEA), 98 (upper bound)' (megajoule, CH, None)	Electricity from/to grid	0.00370617
('ILCD 2.0 2018 midpoint', 'climate change', 'climate change total')	'ATR BM, HT+LT, + CCS (MDEA), 98 (upper bound)' (megajoule, CH, None)	Water supply	2.27993e-05
('ILCD 2.0 2018 midpoint', 'climate change', 'climate change total')	'ATR BM, HT+LT, + CCS (MDEA), 98 (upper bound)' (megajoule, CH, None)	Catalysts&adsorbents	9.81592e-05
('ILCD 2.0 2018 midpoint', 'climate change', 'climate change total')	'ATR BM, HT+LT, + CCS (MDEA), 98 (upper bound)' (megajoule, CH, None)	CO2 transport and storage	0.000286444
('ILCD 2.0 2018 midpoint', 'climate change', 'climate change total')	'ATR BM, HT+LT, + CCS (MDEA), 98 (upper bound)' (megajoule, CH, None)	Direct CO2 emissions	0.0047197
('ILCD 2.0 2018 midpoint', 'climate change', 'climate change total')	'ATR BM, HT+LT, + CCS (MDEA), 98 (upper bound)' (megajoule, CH, None)	Emissions from fuel burning in furnace	0
('ILCD 2.0 2018 midpoint', 'climate change', 'climate change total')	'ATR BM, HT+LT, + CCS (MDEA), 90 (lower bound)' (megajoule, CH, None)	Fuel supply chain	-0.105252
('ILCD 2.0 2018 midpoint', 'climate change', 'climate change total')	'ATR BM, HT+LT, + CCS (MDEA), 90 (lower bound)' (megajoule, CH, None)	Plant infrastructure	0.000631279
('ILCD 2.0 2018 midpoint', 'climate change', 'climate change total')	'ATR BM, HT+LT, + CCS (MDEA), 90 (lower bound)' (megajoule, CH, None)	Electricity from/to grid	0.00342816
('ILCD 2.0 2018 midpoint', 'climate change', 'climate change total')	'ATR BM, HT+LT, + CCS (MDEA), 90 (lower bound)' (megajoule, CH, None)	Water supply	2.27993e-05
('ILCD 2.0 2018 midpoint', 'climate change', 'climate change total')	'ATR BM, HT+LT, + CCS (MDEA), 90 (lower bound)' (megajoule, CH, None)	Catalysts&adsorbents	9.75925e-05
('ILCD 2.0 2018 midpoint', 'climate change', 'climate change total')	'ATR BM, HT+LT, + CCS (MDEA), 90 (lower bound)' (megajoule, CH, None)	CO2 transport and storage	0.00026306
('ILCD 2.0 2018 midpoint', 'climate change', 'climate change total')	'ATR BM, HT+LT, + CCS (MDEA), 90 (lower bound)' (megajoule, CH, None)	Direct CO2 emissions	0.0103782
('ILCD 2.0 2018 midpoint', 'climate change', 'climate change total')	'ATR BM, HT+LT, + CCS (MDEA), 90 (lower bound)' (megajoule, CH, None)	Emissions from fuel burning in furnace	0
('ILCD 2.0 2018 midpoint', 'climate change', 'climate change total')	'ATR NG, HT+LT, + CCS (MDEA), 98 (average), 25 bar' (megajoule, CH, None)	Fuel supply chain	0.0130748
('ILCD 2.0 2018 midpoint', 'climate change', 'climate change total')	'ATR NG, HT+LT, + CCS (MDEA), 98 (average), 25 bar' (megajoule, CH, None)	Plant infrastructure	0.00063132
('ILCD 2.0 2018 midpoint', 'climate change', 'climate change total')	'ATR NG, HT+LT, + CCS (MDEA), 98 (average), 25 bar' (megajoule, CH, None)	Electricity from/to grid	-0.000343443
('ILCD 2.0 2018 midpoint', 'climate change', 'climate change total')	'ATR NG, HT+LT, + CCS (MDEA), 98 (average), 25 bar' (megajoule, CH, None)	Water supply	2.28008e-05
('ILCD 2.0 2018 midpoint', 'climate change', 'climate change total')	'ATR NG, HT+LT, + CCS (MDEA), 98 (average), 25 bar' (megajoule, CH, None)	Catalysts&adsorbents	9.8181e-05
('ILCD 2.0 2018 midpoint', 'climate change', 'climate change total')	'ATR NG, HT+LT, + CCS (MDEA), 98 (average), 25 bar' (megajoule, CH, None)	CO2 transport and storage	0.000287343
('ILCD 2.0 2018 midpoint', 'climate change', 'climate change total')	'ATR NG, HT+LT, + CCS (MDEA), 98 (average), 25 bar' (megajoule, CH, None)	Direct CO2 emissions	0.0049032
('ILCD 2.0 2018 midpoint', 'climate change', 'climate change total')	'ATR NG, HT+LT, + CCS (MDEA), 98 (average), 25 bar' (megajoule, CH, None)	Emissions from fuel burning in furnace	0
('ILCD 2.0 2018 midpoint', 'climate change', 'climate change total')	'ATR BM, HT+LT, +CCS (VPSA), 98 (average), hydropower electricity' (megajoule, CH, None)	Fuel supply chain	-0.105772
('ILCD 2.0 2018 midpoint', 'climate change', 'climate change total')	'ATR BM, HT+LT, +CCS (VPSA), 98 (average), hydropower electricity' (megajoule, CH, None)	Plant infrastructure	0.000631278
('ILCD 2.0 2018 midpoint', 'climate change', 'climate change total')	'ATR BM, HT+LT, +CCS (VPSA), 98 (average), hydropower electricity' (megajoule, CH, None)	Electricity from/to grid	8.12012e-05
('ILCD 2.0 2018 midpoint', 'climate change', 'climate change total')	'ATR BM, HT+LT, +CCS (VPSA), 98 (average), hydropower electricity' (megajoule, CH, None)	Water supply	2.27992e-05
('ILCD 2.0 2018 midpoint', 'climate change', 'climate change total')	'ATR BM, HT+LT, +CCS (VPSA), 98 (average), hydropower electricity' (megajoule, CH, None)	Catalysts&adsorbents	9.12173e-05
('ILCD 2.0 2018 midpoint', 'climate change', 'climate change total')	'ATR BM, HT+LT, +CCS (VPSA), 98 (average), hydropower electricity' (megajoule, CH, None)	CO2 transport and storage	0.000293554
('ILCD 2.0 2018 midpoint', 'climate change', 'climate change total')	'ATR BM, HT+LT, +CCS (VPSA), 98 (average), hydropower electricity' (megajoule, CH, None)	Direct CO2 emissions	0.0014239
('ILCD 2.0 2018 midpoint', 'climate change', 'climate change total')	'ATR BM, HT+LT, +CCS (VPSA), 98 (average), hydropower electricity' (megajoule, CH, None)	Emissions from fuel burning in furnace	0
('ILCD 2.0 2018 midpoint', 'climate change', 'climate change total')	'ATR BM, HT+LT, + CCS (VPSA), 98 (average), digestate incineration' (megajoule, CH, None)	Fuel supply chain	-0.0696898
('ILCD 2.0 2018 midpoint', 'climate change', 'climate change total')	'ATR BM, HT+LT, + CCS (VPSA), 98 (average), digestate incineration' (megajoule, CH, None)	Plant infrastructure	0.000631278
('ILCD 2.0 2018 midpoint', 'climate change', 'climate change total')	'ATR BM, HT+LT, + CCS (VPSA), 98 (average), digestate incineration' (megajoule, CH, None)	Electricity from/to grid	0.00526943
('ILCD 2.0 2018 midpoint', 'climate change', 'climate change total')	'ATR BM, HT+LT, + CCS (VPSA), 98 (average), digestate incineration' (megajoule, CH, None)	Water supply	2.27992e-05
('ILCD 2.0 2018 midpoint', 'climate change', 'climate change total')	'ATR BM, HT+LT, + CCS (VPSA), 98 (average), digestate incineration' (megajoule, CH, None)	Catalysts&adsorbents	9.12173e-05
('ILCD 2.0 2018 midpoint', 'climate change', 'climate change total')	'ATR BM, HT+LT, + CCS (VPSA), 98 (average), digestate incineration' (megajoule, CH, None)	CO2 transport and storage	0.000293554
('ILCD 2.0 2018 midpoint', 'climate change', 'climate change total')	'ATR BM, HT+LT, + CCS (VPSA), 98 (average), digestate incineration' (megajoule, CH, None)	Direct CO2 emissions	0.0014239
('ILCD 2.0 2018 midpoint', 'climate change', 'climate change total')	'ATR BM, HT+LT, + CCS (VPSA), 98 (average), digestate incineration' (megajoule, CH, None)	Emissions from fuel burning in furnace	0
('ILCD 2.0 2018 midpoint', 'climate change', 'climate change total')	'ATR NG, HT+LT, +CCS (VPSA), 98 (average), hydropower electricity' (megajoule, CH, None)	Fuel supply chain	0.0131384
('ILCD 2.0 2018 midpoint', 'climate change', 'climate change total')	'ATR NG, HT+LT, +CCS (VPSA), 98 (average), hydropower electricity' (megajoule, CH, None)	Plant infrastructure	0.000631291
('ILCD 2.0 2018 midpoint', 'climate change', 'climate change total')	'ATR NG, HT+LT, +CCS (VPSA), 98 (average), hydropower electricity' (megajoule, CH, None)	Electricity from/to grid	8.46906e-05
('ILCD 2.0 2018 midpoint', 'climate change', 'climate change total')	'ATR NG, HT+LT, +CCS (VPSA), 98 (average), hydropower electricity' (megajoule, CH, None)	Water supply	2.27997e-05
('ILCD 2.0 2018 midpoint', 'climate change', 'climate change total')	'ATR NG, HT+LT, +CCS (VPSA), 98 (average), hydropower electricity' (megajoule, CH, None)	Catalysts&adsorbents	9.12173e-05
('ILCD 2.0 2018 midpoint', 'climate change', 'climate change total')	'ATR NG, HT+LT, +CCS (VPSA), 98 (average), hydropower electricity' (megajoule, CH, None)	CO2 transport and storage	0.000294518
('ILCD 2.0 2018 midpoint', 'climate change', 'climate change total')	'ATR NG, HT+LT, +CCS (VPSA), 98 (average), hydropower electricity' (megajoule, CH, None)	Direct CO2 emissions	0.00159137
('ILCD 2.0 2018 midpoint', 'climate change', 'climate change total')	'ATR NG, HT+LT, +CCS (VPSA), 98 (average), hydropower electricity' (megajoule, CH, None)	Emissions from fuel burning in furnace	0
('ILCD 2.0 2018 midpoint', 'climate change', 'climate change total')	'ATR NG, HT+LT, + CCS (MDEA), 90 (lower bound)' (megajoule, CH, None)	Fuel supply chain	0.0130748
('ILCD 2.0 2018 midpoint', 'climate change', 'climate change total')	'ATR NG, HT+LT, + CCS (MDEA), 90 (lower bound)' (megajoule, CH, None)	Plant infrastructure	0.000631318
('ILCD 2.0 2018 midpoint', 'climate change', 'climate change total')	'ATR NG, HT+LT, + CCS (MDEA), 90 (lower bound)' (megajoule, CH, None)	Electricity from/to grid	0.00361142
('ILCD 2.0 2018 midpoint', 'climate change', 'climate change total')	'ATR NG, HT+LT, + CCS (MDEA), 90 (lower bound)' (megajoule, CH, None)	Water supply	2.28008e-05
('ILCD 2.0 2018 midpoint', 'climate change', 'climate change total')	'ATR NG, HT+LT, + CCS (MDEA), 90 (lower bound)' (megajoule, CH, None)	Catalysts&adsorbents	9.76125e-05
('ILCD 2.0 2018 midpoint', 'climate change', 'climate change total')	'ATR NG, HT+LT, + CCS (MDEA), 90 (lower bound)' (megajoule, CH, None)	CO2 transport and storage	0.000263886
('ILCD 2.0 2018 midpoint', 'climate change', 'climate change total')	'ATR NG, HT+LT, + CCS (MDEA), 90 (lower bound)' (megajoule, CH, None)	Direct CO2 emissions	0.0105791
('ILCD 2.0 2018 midpoint', 'climate change', 'climate change total')	'ATR NG, HT+LT, + CCS (MDEA), 90 (lower bound)' (megajoule, CH, None)	Emissions from fuel burning in furnace	0
('ILCD 2.0 2018 midpoint', 'climate change', 'climate change total')	'ATR NG, HT+LT, 25 bar' (megajoule, CH, None)	Fuel supply chain	0.0130748
('ILCD 2.0 2018 midpoint', 'climate change', 'climate change total')	'ATR NG, HT+LT, 25 bar' (megajoule, CH, None)	Plant infrastructure	0.000631318
('ILCD 2.0 2018 midpoint', 'climate change', 'climate change total')	'ATR NG, HT+LT, 25 bar' (megajoule, CH, None)	Electricity from/to grid	-0.00209676
('ILCD 2.0 2018 midpoint', 'climate change', 'climate change total')	'ATR NG, HT+LT, 25 bar' (megajoule, CH, None)	Water supply	2.28008e-05
('ILCD 2.0 2018 midpoint', 'climate change', 'climate change total')	'ATR NG, HT+LT, 25 bar' (megajoule, CH, None)	Catalysts&adsorbents	9.12173e-05
('ILCD 2.0 2018 midpoint', 'climate change', 'climate change total')	'ATR NG, HT+LT, 25 bar' (megajoule, CH, None)	Direct CO2 emissions	0.0748903
('ILCD 2.0 2018 midpoint', 'climate change', 'climate change total')	'ATR NG, HT+LT, 25 bar' (megajoule, CH, None)	Emissions from fuel burning in furnace	0
('ILCD 2.0 2018 midpoint', 'climate change', 'climate change total')	'ATR BM, HT+LT, + CCS (MDEA), 90 (upper bound)' (megajoule, CH, None)	Fuel supply chain	-0.105252
('ILCD 2.0 2018 midpoint', 'climate change', 'climate change total')	'ATR BM, HT+LT, + CCS (MDEA), 90 (upper bound)' (megajoule, CH, None)	Plant infrastructure	0.000631279
('ILCD 2.0 2018 midpoint', 'climate change', 'climate change total')	'ATR BM, HT+LT, + CCS (MDEA), 90 (upper bound)' (megajoule, CH, None)	Electricity from/to grid	0.00344174
('ILCD 2.0 2018 midpoint', 'climate change', 'climate change total')	'ATR BM, HT+LT, + CCS (MDEA), 90 (upper bound)' (megajoule, CH, None)	Water supply	2.27993e-05
('ILCD 2.0 2018 midpoint', 'climate change', 'climate change total')	'ATR BM, HT+LT, + CCS (MDEA), 90 (upper bound)' (megajoule, CH, None)	Catalysts&adsorbents	9.75925e-05
('ILCD 2.0 2018 midpoint', 'climate change', 'climate change total')	'ATR BM, HT+LT, + CCS (MDEA), 90 (upper bound)' (megajoule, CH, None)	CO2 transport and storage	0.00026306
('ILCD 2.0 2018 midpoint', 'climate change', 'climate change total')	'ATR BM, HT+LT, + CCS (MDEA), 90 (upper bound)' (megajoule, CH, None)	Direct CO2 emissions	0.0103782
('ILCD 2.0 2018 midpoint', 'climate change', 'climate change total')	'ATR BM, HT+LT, + CCS (MDEA), 90 (upper bound)' (megajoule, CH, None)	Emissions from fuel burning in furnace	0
('ILCD 2.0 2018 midpoint', 'climate change', 'climate change total')	'ATR BM, HT+LT, with digestate incineration' (megajoule, CH, None)	Fuel supply chain	-0.0693463
('ILCD 2.0 2018 midpoint', 'climate change', 'climate change total')	'ATR BM, HT+LT, with digestate incineration' (megajoule, CH, None)	Plant infrastructure	0.000631281
('ILCD 2.0 2018 midpoint', 'climate change', 'climate change total')	'ATR BM, HT+LT, with digestate incineration' (megajoule, CH, None)	Electricity from/to grid	0.00193925
('ILCD 2.0 2018 midpoint', 'climate change', 'climate change total')	'ATR BM, HT+LT, with digestate incineration' (megajoule, CH, None)	Water supply	2.27993e-05
('ILCD 2.0 2018 midpoint', 'climate change', 'climate change total')	'ATR BM, HT+LT, with digestate incineration' (megajoule, CH, None)	Catalysts&adsorbents	9.12173e-05
('ILCD 2.0 2018 midpoint', 'climate change', 'climate change total')	'ATR BM, HT+LT, with digestate incineration' (megajoule, CH, None)	Direct CO2 emissions	0.0740356
('ILCD 2.0 2018 midpoint', 'climate change', 'climate change total')	'ATR BM, HT+LT, with digestate incineration' (megajoule, CH, None)	Emissions from fuel burning in furnace	0
('ILCD 2.0 2018 midpoint', 'climate change', 'climate change total')	'ATR BM, HT+LT, cut-off approach' (megajoule, CH, None)	Fuel supply chain	0.0837098
('ILCD 2.0 2018 midpoint', 'climate change', 'climate change total')	'ATR BM, HT+LT, cut-off approach' (megajoule, CH, None)	Plant infrastructure	0.000631279
('ILCD 2.0 2018 midpoint', 'climate change', 'climate change total')	'ATR BM, HT+LT, cut-off approach' (megajoule, CH, None)	Electricity from/to grid	0.00343495
('ILCD 2.0 2018 midpoint', 'climate change', 'climate change total')	'ATR BM, HT+LT, cut-off approach' (megajoule, CH, None)	Water supply	2.27993e-05
('ILCD 2.0 2018 midpoint', 'climate change', 'climate change total')	'ATR BM, HT+LT, cut-off approach' (megajoule, CH, None)	Catalysts&adsorbents	9.12173e-05
('ILCD 2.0 2018 midpoint', 'climate change', 'climate change total')	'ATR BM, HT+LT, cut-off approach' (megajoule, CH, None)	CO2 transport and storage	0.00026306
('ILCD 2.0 2018 midpoint', 'climate change', 'climate change total')	'ATR BM, HT+LT, cut-off approach' (megajoule, CH, None)	Direct CO2 emissions	0.0103782
('ILCD 2.0 2018 midpoint', 'climate change', 'climate change total')	'ATR BM, HT+LT, cut-off approach' (megajoule, CH, None)	Emissions from fuel burning in furnace	0
('ILCD 2.0 2018 midpoint', 'climate change', 'climate change total')	'ATR BM, HT+LT, maximum C uptake' (megajoule, CH, None)	Fuel supply chain	-0.150638
('ILCD 2.0 2018 midpoint', 'climate change', 'climate change total')	'ATR BM, HT+LT, maximum C uptake' (megajoule, CH, None)	Plant infrastructure	0.000631281
('ILCD 2.0 2018 midpoint', 'climate change', 'climate change total')	'ATR BM, HT+LT, maximum C uptake' (megajoule, CH, None)	Electricity from/to grid	0.00193925
('ILCD 2.0 2018 midpoint', 'climate change', 'climate change total')	'ATR BM, HT+LT, maximum C uptake' (megajoule, CH, None)	Water supply	2.27993e-05
('ILCD 2.0 2018 midpoint', 'climate change', 'climate change total')	'ATR BM, HT+LT, maximum C uptake' (megajoule, CH, None)	Catalysts&adsorbents	9.12173e-05
('ILCD 2.0 2018 midpoint', 'climate change', 'climate change total')	'ATR BM, HT+LT, maximum C uptake' (megajoule, CH, None)	Direct CO2 emissions	0.0740356
('ILCD 2.0 2018 midpoint', 'climate change', 'climate change total')	'ATR BM, HT+LT, maximum C uptake' (megajoule, CH, None)	Emissions from fuel burning in furnace	0
('ILCD 2.0 2018 midpoint', 'climate change', 'climate change total')	'ATR NG, HT+LT, + CCS (MDEA), 98 (lower bound)' (megajoule, CH, None)	Fuel supply chain	0.0130748
('ILCD 2.0 2018 midpoint', 'climate change', 'climate change total')	'ATR NG, HT+LT, + CCS (MDEA), 98 (lower bound)' (megajoule, CH, None)	Plant infrastructure	0.000631318
('ILCD 2.0 2018 midpoint', 'climate change', 'climate change total')	'ATR NG, HT+LT, + CCS (MDEA), 98 (lower bound)' (megajoule, CH, None)	Electricity from/to grid	0.0038578
('ILCD 2.0 2018 midpoint', 'climate change', 'climate change total')	'ATR NG, HT+LT, + CCS (MDEA), 98 (lower bound)' (megajoule, CH, None)	Water supply	2.28008e-05
('ILCD 2.0 2018 midpoint', 'climate change', 'climate change total')	'ATR NG, HT+LT, + CCS (MDEA), 98 (lower bound)' (megajoule, CH, None)	Catalysts&adsorbents	9.8181e-05
('ILCD 2.0 2018 midpoint', 'climate change', 'climate change total')	'ATR NG, HT+LT, + CCS (MDEA), 98 (lower bound)' (megajoule, CH, None)	CO2 transport and storage	0.000287343
('ILCD 2.0 2018 midpoint', 'climate change', 'climate change total')	'ATR NG, HT+LT, + CCS (MDEA), 98 (lower bound)' (megajoule, CH, None)	Direct CO2 emissions	0.0049032
('ILCD 2.0 2018 midpoint', 'climate change', 'climate change total')	'ATR NG, HT+LT, + CCS (MDEA), 98 (lower bound)' (megajoule, CH, None)	Emissions from fuel burning in furnace	0
('ILCD 2.0 2018 midpoint', 'climate change', 'climate change total')	'ATR BM, HT+LT, + CCS (VPSA), 98 (lower bound)' (megajoule, CH, None)	Fuel supply chain	-0.105293
('ILCD 2.0 2018 midpoint', 'climate change', 'climate change total')	'ATR BM, HT+LT, + CCS (VPSA), 98 (lower bound)' (megajoule, CH, None)	Plant infrastructure	0.000631281
('ILCD 2.0 2018 midpoint', 'climate change', 'climate change total')	'ATR BM, HT+LT, + CCS (VPSA), 98 (lower bound)' (megajoule, CH, None)	Electricity from/to grid	0.00510466
('ILCD 2.0 2018 midpoint', 'climate change', 'climate change total')	'ATR BM, HT+LT, + CCS (VPSA), 98 (lower bound)' (megajoule, CH, None)	Water supply	2.27994e-05
('ILCD 2.0 2018 midpoint', 'climate change', 'climate change total')	'ATR BM, HT+LT, + CCS (VPSA), 98 (lower bound)' (megajoule, CH, None)	Catalysts&adsorbents	9.12173e-05
('ILCD 2.0 2018 midpoint', 'climate change', 'climate change total')	'ATR BM, HT+LT, + CCS (VPSA), 98 (lower bound)' (megajoule, CH, None)	CO2 transport and storage	0.000292212
('ILCD 2.0 2018 midpoint', 'climate change', 'climate change total')	'ATR BM, HT+LT, + CCS (VPSA), 98 (lower bound)' (megajoule, CH, None)	Direct CO2 emissions	0.00142017
('ILCD 2.0 2018 midpoint', 'climate change', 'climate change total')	'ATR BM, HT+LT, + CCS (VPSA), 98 (lower bound)' (megajoule, CH, None)	Emissions from fuel burning in furnace	0
('ILCD 2.0 2018 midpoint', 'climate change', 'climate change total')	'ATR BM, HT+LT, + CCS (VPSA), 98 (upper bound)' (megajoule, CH, None)	Fuel supply chain	-0.106252
('ILCD 2.0 2018 midpoint', 'climate change', 'climate change total')	'ATR BM, HT+LT, + CCS (VPSA), 98 (upper bound)' (megajoule, CH, None)	Plant infrastructure	0.000631274
('ILCD 2.0 2018 midpoint', 'climate change', 'climate change total')	'ATR BM, HT+LT, + CCS (VPSA), 98 (upper bound)' (megajoule, CH, None)	Electricity from/to grid	0.00543419
('ILCD 2.0 2018 midpoint', 'climate change', 'climate change total')	'ATR BM, HT+LT, + CCS (VPSA), 98 (upper bound)' (megajoule, CH, None)	Water supply	2.27991e-05
('ILCD 2.0 2018 midpoint', 'climate change', 'climate change total')	'ATR BM, HT+LT, + CCS (VPSA), 98 (upper bound)' (megajoule, CH, None)	Catalysts&adsorbents	9.12173e-05
('ILCD 2.0 2018 midpoint', 'climate change', 'climate change total')	'ATR BM, HT+LT, + CCS (VPSA), 98 (upper bound)' (megajoule, CH, None)	CO2 transport and storage	0.000294897
('ILCD 2.0 2018 midpoint', 'climate change', 'climate change total')	'ATR BM, HT+LT, + CCS (VPSA), 98 (upper bound)' (megajoule, CH, None)	Direct CO2 emissions	0.00142764
('ILCD 2.0 2018 midpoint', 'climate change', 'climate change total')	'ATR BM, HT+LT, + CCS (VPSA), 98 (upper bound)' (megajoule, CH, None)	Emissions from fuel burning in furnace	0
('ILCD 2.0 2018 midpoint', 'climate change', 'climate change total')	'ATR BM, HT+LT, + CCS (MDEA), 98 (lower bound)' (megajoule, CH, None)	Fuel supply chain	-0.105252
('ILCD 2.0 2018 midpoint', 'climate change', 'climate change total')	'ATR BM, HT+LT, + CCS (MDEA), 98 (lower bound)' (megajoule, CH, None)	Plant infrastructure	0.000631279
('ILCD 2.0 2018 midpoint', 'climate change', 'climate change total')	'ATR BM, HT+LT, + CCS (MDEA), 98 (lower bound)' (megajoule, CH, None)	Electricity from/to grid	0.00367908
('ILCD 2.0 2018 midpoint', 'climate change', 'climate change total')	'ATR BM, HT+LT, + CCS (MDEA), 98 (lower bound)' (megajoule, CH, None)	Water supply	2.27993e-05
('ILCD 2.0 2018 midpoint', 'climate change', 'climate change total')	'ATR BM, HT+LT, + CCS (MDEA), 98 (lower bound)' (megajoule, CH, None)	Catalysts&adsorbents	9.81592e-05
('ILCD 2.0 2018 midpoint', 'climate change', 'climate change total')	'ATR BM, HT+LT, + CCS (MDEA), 98 (lower bound)' (megajoule, CH, None)	CO2 transport and storage	0.000286444
('ILCD 2.0 2018 midpoint', 'climate change', 'climate change total')	'ATR BM, HT+LT, + CCS (MDEA), 98 (lower bound)' (megajoule, CH, None)	Direct CO2 emissions	0.0047197
('ILCD 2.0 2018 midpoint', 'climate change', 'climate change total')	'ATR BM, HT+LT, + CCS (MDEA), 98 (lower bound)' (megajoule, CH, None)	Emissions from fuel burning in furnace	0
('ILCD 2.0 2018 midpoint', 'climate change', 'climate change total')	'ATR BM, HT+LT, + CCS (MDEA), 98 (average), digestate incineration' (megajoule, CH, None)	Fuel supply chain	-0.069347
('ILCD 2.0 2018 midpoint', 'climate change', 'climate change total')	'ATR BM, HT+LT, + CCS (MDEA), 98 (average), digestate incineration' (megajoule, CH, None)	Plant infrastructure	0.000631279
('ILCD 2.0 2018 midpoint', 'climate change', 'climate change total')	'ATR BM, HT+LT, + CCS (MDEA), 98 (average), digestate incineration' (megajoule, CH, None)	Electricity from/to grid	0.00369263
('ILCD 2.0 2018 midpoint', 'climate change', 'climate change total')	'ATR BM, HT+LT, + CCS (MDEA), 98 (average), digestate incineration' (megajoule, CH, None)	Water supply	2.27993e-05
('ILCD 2.0 2018 midpoint', 'climate change', 'climate change total')	'ATR BM, HT+LT, + CCS (MDEA), 98 (average), digestate incineration' (megajoule, CH, None)	Catalysts&adsorbents	9.12173e-05
('ILCD 2.0 2018 midpoint', 'climate change', 'climate change total')	'ATR BM, HT+LT, + CCS (MDEA), 98 (average), digestate incineration' (megajoule, CH, None)	CO2 transport and storage	0.000286444
('ILCD 2.0 2018 midpoint', 'climate change', 'climate change total')	'ATR BM, HT+LT, + CCS (MDEA), 98 (average), digestate incineration' (megajoule, CH, None)	Direct CO2 emissions	0.0047197
('ILCD 2.0 2018 midpoint', 'climate change', 'climate change total')	'ATR BM, HT+LT, + CCS (MDEA), 98 (average), digestate incineration' (megajoule, CH, None)	Emissions from fuel burning in furnace	0
('ILCD 2.0 2018 midpoint', 'climate change', 'climate change total')	'ATR NG, HT+LT, + CCS (MDEA), 98 (average)' (megajoule, CH, None)	Fuel supply chain	0.0130748
('ILCD 2.0 2018 midpoint', 'climate change', 'climate change total')	'ATR NG, HT+LT, + CCS (MDEA), 98 (average)' (megajoule, CH, None)	Plant infrastructure	0.00063132
('ILCD 2.0 2018 midpoint', 'climate change', 'climate change total')	'ATR NG, HT+LT, + CCS (MDEA), 98 (average)' (megajoule, CH, None)	Electricity from/to grid	0.00387135
('ILCD 2.0 2018 midpoint', 'climate change', 'climate change total')	'ATR NG, HT+LT, + CCS (MDEA), 98 (average)' (megajoule, CH, None)	Water supply	2.28008e-05
('ILCD 2.0 2018 midpoint', 'climate change', 'climate change total')	'ATR NG, HT+LT, + CCS (MDEA), 98 (average)' (megajoule, CH, None)	Catalysts&adsorbents	9.8181e-05
('ILCD 2.0 2018 midpoint', 'climate change', 'climate change total')	'ATR NG, HT+LT, + CCS (MDEA), 98 (average)' (megajoule, CH, None)	CO2 transport and storage	0.000287343
('ILCD 2.0 2018 midpoint', 'climate change', 'climate change total')	'ATR NG, HT+LT, + CCS (MDEA), 98 (average)' (megajoule, CH, None)	Direct CO2 emissions	0.0049032
('ILCD 2.0 2018 midpoint', 'climate change', 'climate change total')	'ATR NG, HT+LT, + CCS (MDEA), 98 (average)' (megajoule, CH, None)	Emissions from fuel burning in furnace	0
('ILCD 2.0 2018 midpoint', 'climate change', 'climate change total')	'ATR NG, HT+LT, + CCS (MDEA), 90 (upper bound)' (megajoule, CH, None)	Fuel supply chain	0.0130734
('ILCD 2.0 2018 midpoint', 'climate change', 'climate change total')	'ATR NG, HT+LT, + CCS (MDEA), 90 (upper bound)' (megajoule, CH, None)	Plant infrastructure	0.000631255
('ILCD 2.0 2018 midpoint', 'climate change', 'climate change total')	'ATR NG, HT+LT, + CCS (MDEA), 90 (upper bound)' (megajoule, CH, None)	Electricity from/to grid	0.00363778
('ILCD 2.0 2018 midpoint', 'climate change', 'climate change total')	'ATR NG, HT+LT, + CCS (MDEA), 90 (upper bound)' (megajoule, CH, None)	Water supply	2.27984e-05
('ILCD 2.0 2018 midpoint', 'climate change', 'climate change total')	'ATR NG, HT+LT, + CCS (MDEA), 90 (upper bound)' (megajoule, CH, None)	Catalysts&adsorbents	9.76119e-05
('ILCD 2.0 2018 midpoint', 'climate change', 'climate change total')	'ATR NG, HT+LT, + CCS (MDEA), 90 (upper bound)' (megajoule, CH, None)	CO2 transport and storage	0.000263858
('ILCD 2.0 2018 midpoint', 'climate change', 'climate change total')	'ATR NG, HT+LT, + CCS (MDEA), 90 (upper bound)' (megajoule, CH, None)	Direct CO2 emissions	0.0105791
('ILCD 2.0 2018 midpoint', 'climate change', 'climate change total')	'ATR NG, HT+LT, + CCS (MDEA), 90 (upper bound)' (megajoule, CH, None)	Emissions from fuel burning in furnace	0
('ILCD 2.0 2018 midpoint', 'climate change', 'climate change total')	'ATR NG, HT+LT, + CCS (VPSA), 98 (upper bound)' (megajoule, CH, None)	Fuel supply chain	0.0131983
('ILCD 2.0 2018 midpoint', 'climate change', 'climate change total')	'ATR NG, HT+LT, + CCS (VPSA), 98 (upper bound)' (megajoule, CH, None)	Plant infrastructure	0.000631281
('ILCD 2.0 2018 midpoint', 'climate change', 'climate change total')	'ATR NG, HT+LT, + CCS (VPSA), 98 (upper bound)' (megajoule, CH, None)	Electricity from/to grid	0.00565949
('ILCD 2.0 2018 midpoint', 'climate change', 'climate change total')	'ATR NG, HT+LT, + CCS (VPSA), 98 (upper bound)' (megajoule, CH, None)	Water supply	2.27994e-05
('ILCD 2.0 2018 midpoint', 'climate change', 'climate change total')	'ATR NG, HT+LT, + CCS (VPSA), 98 (upper bound)' (megajoule, CH, None)	Catalysts&adsorbents	9.12173e-05
('ILCD 2.0 2018 midpoint', 'climate change', 'climate change total')	'ATR NG, HT+LT, + CCS (VPSA), 98 (upper bound)' (megajoule, CH, None)	CO2 transport and storage	0.000295851
('ILCD 2.0 2018 midpoint', 'climate change', 'climate change total')	'ATR NG, HT+LT, + CCS (VPSA), 98 (upper bound)' (megajoule, CH, None)	Direct CO2 emissions	0.00160992
('ILCD 2.0 2018 midpoint', 'climate change', 'climate change total')	'ATR NG, HT+LT, + CCS (VPSA), 98 (upper bound)' (megajoule, CH, None)	Emissions from fuel burning in furnace	0
('ILCD 2.0 2018 midpoint', 'climate change', 'climate change total')	'ATR BM, HT+LT, hydropower electricity' (megajoule, CH, None)	Fuel supply chain	-0.105251
('ILCD 2.0 2018 midpoint', 'climate change', 'climate change total')	'ATR BM, HT+LT, hydropower electricity' (megajoule, CH, None)	Plant infrastructure	0.000631281
('ILCD 2.0 2018 midpoint', 'climate change', 'climate change total')	'ATR BM, HT+LT, hydropower electricity' (megajoule, CH, None)	Electricity from/to grid	2.98835e-05
('ILCD 2.0 2018 midpoint', 'climate change', 'climate change total')	'ATR BM, HT+LT, hydropower electricity' (megajoule, CH, None)	Water supply	2.27993e-05
('ILCD 2.0 2018 midpoint', 'climate change', 'climate change total')	'ATR BM, HT+LT, hydropower electricity' (megajoule, CH, None)	Catalysts&adsorbents	9.12173e-05
('ILCD 2.0 2018 midpoint', 'climate change', 'climate change total')	'ATR BM, HT+LT, hydropower electricity' (megajoule, CH, None)	Direct CO2 emissions	0.0740356
('ILCD 2.0 2018 midpoint', 'climate change', 'climate change total')	'ATR BM, HT+LT, hydropower electricity' (megajoule, CH, None)	Emissions from fuel burning in furnace	0
('ILCD 2.0 2018 midpoint', 'climate change', 'climate change total')	'ATR BM, HT+LT, + CCS (MDEA), 98 (average)' (megajoule, CH, None)	Fuel supply chain	-0.105252
('ILCD 2.0 2018 midpoint', 'climate change', 'climate change total')	'ATR BM, HT+LT, + CCS (MDEA), 98 (average)' (megajoule, CH, None)	Plant infrastructure	0.000631279
('ILCD 2.0 2018 midpoint', 'climate change', 'climate change total')	'ATR BM, HT+LT, + CCS (MDEA), 98 (average)' (megajoule, CH, None)	Electricity from/to grid	0.00369263
('ILCD 2.0 2018 midpoint', 'climate change', 'climate change total')	'ATR BM, HT+LT, + CCS (MDEA), 98 (average)' (megajoule, CH, None)	Water supply	2.27993e-05
('ILCD 2.0 2018 midpoint', 'climate change', 'climate change total')	'ATR BM, HT+LT, + CCS (MDEA), 98 (average)' (megajoule, CH, None)	Catalysts&adsorbents	9.12173e-05
('ILCD 2.0 2018 midpoint', 'climate change', 'climate change total')	'ATR BM, HT+LT, + CCS (MDEA), 98 (average)' (megajoule, CH, None)	CO2 transport and storage	0.000286444
('ILCD 2.0 2018 midpoint', 'climate change', 'climate change total')	'ATR BM, HT+LT, + CCS (MDEA), 98 (average)' (megajoule, CH, None)	Direct CO2 emissions	0.0047197
('ILCD 2.0 2018 midpoint', 'climate change', 'climate change total')	'ATR BM, HT+LT, + CCS (MDEA), 98 (average)' (megajoule, CH, None)	Emissions from fuel burning in furnace	0
('ILCD 2.0 2018 midpoint', 'climate change', 'climate change total')	'ATR BM, HT+LT, + CCS (MDEA), 90 (average)' (megajoule, CH, None)	Fuel supply chain	-0.105252
('ILCD 2.0 2018 midpoint', 'climate change', 'climate change total')	'ATR BM, HT+LT, + CCS (MDEA), 90 (average)' (megajoule, CH, None)	Plant infrastructure	0.000631279
('ILCD 2.0 2018 midpoint', 'climate change', 'climate change total')	'ATR BM, HT+LT, + CCS (MDEA), 90 (average)' (megajoule, CH, None)	Electricity from/to grid	0.00343495
('ILCD 2.0 2018 midpoint', 'climate change', 'climate change total')	'ATR BM, HT+LT, + CCS (MDEA), 90 (average)' (megajoule, CH, None)	Water supply	2.27993e-05
('ILCD 2.0 2018 midpoint', 'climate change', 'climate change total')	'ATR BM, HT+LT, + CCS (MDEA), 90 (average)' (megajoule, CH, None)	Catalysts&adsorbents	9.12173e-05
('ILCD 2.0 2018 midpoint', 'climate change', 'climate change total')	'ATR BM, HT+LT, + CCS (MDEA), 90 (average)' (megajoule, CH, None)	CO2 transport and storage	0.00026306
('ILCD 2.0 2018 midpoint', 'climate change', 'climate change total')	'ATR BM, HT+LT, + CCS (MDEA), 90 (average)' (megajoule, CH, None)	Direct CO2 emissions	0.0103782
('ILCD 2.0 2018 midpoint', 'climate change', 'climate change total')	'ATR BM, HT+LT, + CCS (MDEA), 90 (average)' (megajoule, CH, None)	Emissions from fuel burning in furnace	0
('ILCD 2.0 2018 midpoint', 'climate change', 'climate change total')	'ATR NG, HT+LT, + CCS (VPSA), 98 (average)' (megajoule, CH, None)	Fuel supply chain	0.0131384
('ILCD 2.0 2018 midpoint', 'climate change', 'climate change total')	'ATR NG, HT+LT, + CCS (VPSA), 98 (average)' (megajoule, CH, None)	Plant infrastructure	0.000631291
('ILCD 2.0 2018 midpoint', 'climate change', 'climate change total')	'ATR NG, HT+LT, + CCS (VPSA), 98 (average)' (megajoule, CH, None)	Electricity from/to grid	0.00549587
('ILCD 2.0 2018 midpoint', 'climate change', 'climate change total')	'ATR NG, HT+LT, + CCS (VPSA), 98 (average)' (megajoule, CH, None)	Water supply	2.27997e-05
('ILCD 2.0 2018 midpoint', 'climate change', 'climate change total')	'ATR NG, HT+LT, + CCS (VPSA), 98 (average)' (megajoule, CH, None)	Catalysts&adsorbents	9.12173e-05
('ILCD 2.0 2018 midpoint', 'climate change', 'climate change total')	'ATR NG, HT+LT, + CCS (VPSA), 98 (average)' (megajoule, CH, None)	CO2 transport and storage	0.000294518
('ILCD 2.0 2018 midpoint', 'climate change', 'climate change total')	'ATR NG, HT+LT, + CCS (VPSA), 98 (average)' (megajoule, CH, None)	Direct CO2 emissions	0.00159137
('ILCD 2.0 2018 midpoint', 'climate change', 'climate change total')	'ATR NG, HT+LT, + CCS (VPSA), 98 (average)' (megajoule, CH, None)	Emissions from fuel burning in furnace	0
('ILCD 2.0 2018 midpoint', 'climate change', 'climate change total')	'ATR BM, HT+LT, + CCS (VPSA), 98 (average)' (megajoule, CH, None)	Fuel supply chain	-0.105772
('ILCD 2.0 2018 midpoint', 'climate change', 'climate change total')	'ATR BM, HT+LT, + CCS (VPSA), 98 (average)' (megajoule, CH, None)	Plant infrastructure	0.000631278
('ILCD 2.0 2018 midpoint', 'climate change', 'climate change total')	'ATR BM, HT+LT, + CCS (VPSA), 98 (average)' (megajoule, CH, None)	Electricity from/to grid	0.00526943
('ILCD 2.0 2018 midpoint', 'climate change', 'climate change total')	'ATR BM, HT+LT, + CCS (VPSA), 98 (average)' (megajoule, CH, None)	Water supply	2.27992e-05
('ILCD 2.0 2018 midpoint', 'climate change', 'climate change total')	'ATR BM, HT+LT, + CCS (VPSA), 98 (average)' (megajoule, CH, None)	Catalysts&adsorbents	9.12173e-05
('ILCD 2.0 2018 midpoint', 'climate change', 'climate change total')	'ATR BM, HT+LT, + CCS (VPSA), 98 (average)' (megajoule, CH, None)	CO2 transport and storage	0.000293554
('ILCD 2.0 2018 midpoint', 'climate change', 'climate change total')	'ATR BM, HT+LT, + CCS (VPSA), 98 (average)' (megajoule, CH, None)	Direct CO2 emissions	0.0014239
('ILCD 2.0 2018 midpoint', 'climate change', 'climate change total')	'ATR BM, HT+LT, + CCS (VPSA), 98 (average)' (megajoule, CH, None)	Emissions from fuel burning in furnace	0
('ILCD 2.0 2018 midpoint', 'climate change', 'climate change total')	'ATR BM, HT+LT, 25 bar' (megajoule, CH, None)	Fuel supply chain	-0.0693463
('ILCD 2.0 2018 midpoint', 'climate change', 'climate change total')	'ATR BM, HT+LT, 25 bar' (megajoule, CH, None)	Plant infrastructure	0.000631281
('ILCD 2.0 2018 midpoint', 'climate change', 'climate change total')	'ATR BM, HT+LT, 25 bar' (megajoule, CH, None)	Electricity from/to grid	-0.0022752
('ILCD 2.0 2018 midpoint', 'climate change', 'climate change total')	'ATR BM, HT+LT, 25 bar' (megajoule, CH, None)	Water supply	2.27993e-05
('ILCD 2.0 2018 midpoint', 'climate change', 'climate change total')	'ATR BM, HT+LT, 25 bar' (megajoule, CH, None)	Catalysts&adsorbents	9.12173e-05
('ILCD 2.0 2018 midpoint', 'climate change', 'climate change total')	'ATR BM, HT+LT, 25 bar' (megajoule, CH, None)	Direct CO2 emissions	0.0740356
('ILCD 2.0 2018 midpoint', 'climate change', 'climate change total')	'ATR BM, HT+LT, 25 bar' (megajoule, CH, None)	Emissions from fuel burning in furnace	0
('ILCD 2.0 2018 midpoint', 'climate change', 'climate change total')	'ATR NG, HT+LT, hydropower electricity' (megajoule, CH, None)	Fuel supply chain	0.0130748
('ILCD 2.0 2018 midpoint', 'climate change', 'climate change total')	'ATR NG, HT+LT, hydropower electricity' (megajoule, CH, None)	Plant infrastructure	0.000631318
('ILCD 2.0 2018 midpoint', 'climate change', 'climate change total')	'ATR NG, HT+LT, hydropower electricity' (megajoule, CH, None)	Electricity from/to grid	3.26386e-05
('ILCD 2.0 2018 midpoint', 'climate change', 'climate change total')	'ATR NG, HT+LT, hydropower electricity' (megajoule, CH, None)	Water supply	2.28008e-05
('ILCD 2.0 2018 midpoint', 'climate change', 'climate change total')	'ATR NG, HT+LT, hydropower electricity' (megajoule, CH, None)	Catalysts&adsorbents	9.12173e-05
('ILCD 2.0 2018 midpoint', 'climate change', 'climate change total')	'ATR NG, HT+LT, hydropower electricity' (megajoule, CH, None)	Direct CO2 emissions	0.0748903
('ILCD 2.0 2018 midpoint', 'climate change', 'climate change total')	'ATR NG, HT+LT, hydropower electricity' (megajoule, CH, None)	Emissions from fuel burning in furnace	0
('ILCD 2.0 2018 midpoint', 'climate change', 'climate change total')	'ATR NG, HT+LT, + CCS (MDEA), 98 (upper bound)' (megajoule, CH, None)	Fuel supply chain	0.0130749
('ILCD 2.0 2018 midpoint', 'climate change', 'climate change total')	'ATR NG, HT+LT, + CCS (MDEA), 98 (upper bound)' (megajoule, CH, None)	Plant infrastructure	0.000631322
('ILCD 2.0 2018 midpoint', 'climate change', 'climate change total')	'ATR NG, HT+LT, + CCS (MDEA), 98 (upper bound)' (megajoule, CH, None)	Electricity from/to grid	0.00388491
('ILCD 2.0 2018 midpoint', 'climate change', 'climate change total')	'ATR NG, HT+LT, + CCS (MDEA), 98 (upper bound)' (megajoule, CH, None)	Water supply	2.28009e-05
('ILCD 2.0 2018 midpoint', 'climate change', 'climate change total')	'ATR NG, HT+LT, + CCS (MDEA), 98 (upper bound)' (megajoule, CH, None)	Catalysts&adsorbents	9.81811e-05
('ILCD 2.0 2018 midpoint', 'climate change', 'climate change total')	'ATR NG, HT+LT, + CCS (MDEA), 98 (upper bound)' (megajoule, CH, None)	CO2 transport and storage	0.000287344
('ILCD 2.0 2018 midpoint', 'climate change', 'climate change total')	'ATR NG, HT+LT, + CCS (MDEA), 98 (upper bound)' (megajoule, CH, None)	Direct CO2 emissions	0.0049032
('ILCD 2.0 2018 midpoint', 'climate change', 'climate change total')	'ATR NG, HT+LT, + CCS (MDEA), 98 (upper bound)' (megajoule, CH, None)	Emissions from fuel burning in furnace	0
('ILCD 2.0 2018 midpoint', 'climate change', 'climate change total')	'ATR BM, HT+LT, + CCS (MDEA), 98 (average), cut-off approach' (megajoule, CH, None)	Fuel supply chain	0.0837422
('ILCD 2.0 2018 midpoint', 'climate change', 'climate change total')	'ATR BM, HT+LT, + CCS (MDEA), 98 (average), cut-off approach' (megajoule, CH, None)	Plant infrastructure	0.000631281
('ILCD 2.0 2018 midpoint', 'climate change', 'climate change total')	'ATR BM, HT+LT, + CCS (MDEA), 98 (average), cut-off approach' (megajoule, CH, None)	Electricity from/to grid	0.00510466
('ILCD 2.0 2018 midpoint', 'climate change', 'climate change total')	'ATR BM, HT+LT, + CCS (MDEA), 98 (average), cut-off approach' (megajoule, CH, None)	Water supply	2.27994e-05
('ILCD 2.0 2018 midpoint', 'climate change', 'climate change total')	'ATR BM, HT+LT, + CCS (MDEA), 98 (average), cut-off approach' (megajoule, CH, None)	Catalysts&adsorbents	9.12173e-05
('ILCD 2.0 2018 midpoint', 'climate change', 'climate change total')	'ATR BM, HT+LT, + CCS (MDEA), 98 (average), cut-off approach' (megajoule, CH, None)	CO2 transport and storage	0.000292212
('ILCD 2.0 2018 midpoint', 'climate change', 'climate change total')	'ATR BM, HT+LT, + CCS (MDEA), 98 (average), cut-off approach' (megajoule, CH, None)	Direct CO2 emissions	0.00142017
('ILCD 2.0 2018 midpoint', 'climate change', 'climate change total')	'ATR BM, HT+LT, + CCS (MDEA), 98 (average), cut-off approach' (megajoule, CH, None)	Emissions from fuel burning in furnace	0
('ILCD 2.0 2018 midpoint', 'climate change', 'climate change total')	'ATR NG, HT+LT' (megajoule, CH, None)	Fuel supply chain	0.0130748
('ILCD 2.0 2018 midpoint', 'climate change', 'climate change total')	'ATR NG, HT+LT' (megajoule, CH, None)	Plant infrastructure	0.000631318
('ILCD 2.0 2018 midpoint', 'climate change', 'climate change total')	'ATR NG, HT+LT' (megajoule, CH, None)	Electricity from/to grid	0.00211803
('ILCD 2.0 2018 midpoint', 'climate change', 'climate change total')	'ATR NG, HT+LT' (megajoule, CH, None)	Water supply	2.28008e-05
('ILCD 2.0 2018 midpoint', 'climate change', 'climate change total')	'ATR NG, HT+LT' (megajoule, CH, None)	Catalysts&adsorbents	9.12173e-05
('ILCD 2.0 2018 midpoint', 'climate change', 'climate change total')	'ATR NG, HT+LT' (megajoule, CH, None)	Direct CO2 emissions	0.0748903
('ILCD 2.0 2018 midpoint', 'climate change', 'climate change total')	'ATR NG, HT+LT' (megajoule, CH, None)	Emissions from fuel burning in furnace	0
('ILCD 2.0 2018 midpoint', 'climate change', 'climate change total')	'ATR BM, HT+LT' (megajoule, CH, None)	Fuel supply chain	-0.105251
('ILCD 2.0 2018 midpoint', 'climate change', 'climate change total')	'ATR BM, HT+LT' (megajoule, CH, None)	Plant infrastructure	0.000631281
('ILCD 2.0 2018 midpoint', 'climate change', 'climate change total')	'ATR BM, HT+LT' (megajoule, CH, None)	Electricity from/to grid	0.00193925
('ILCD 2.0 2018 midpoint', 'climate change', 'climate change total')	'ATR BM, HT+LT' (megajoule, CH, None)	Water supply	2.27993e-05
('ILCD 2.0 2018 midpoint', 'climate change', 'climate change total')	'ATR BM, HT+LT' (megajoule, CH, None)	Catalysts&adsorbents	9.12173e-05
('ILCD 2.0 2018 midpoint', 'climate change', 'climate change total')	'ATR BM, HT+LT' (megajoule, CH, None)	Direct CO2 emissions	0.0740356
('ILCD 2.0 2018 midpoint', 'climate change', 'climate change total')	'ATR BM, HT+LT' (megajoule, CH, None)	Emissions from fuel burning in furnace	0
('ILCD 2.0 2018 midpoint', 'climate change', 'climate change total')	'ATR NG, HT+LT, + CCS (MDEA), 90 (average)' (megajoule, CH, None)	Fuel supply chain	0.0130741
('ILCD 2.0 2018 midpoint', 'climate change', 'climate change total')	'ATR NG, HT+LT, + CCS (MDEA), 90 (average)' (megajoule, CH, None)	Plant infrastructure	0.000631287
('ILCD 2.0 2018 midpoint', 'climate change', 'climate change total')	'ATR NG, HT+LT, + CCS (MDEA), 90 (average)' (megajoule, CH, None)	Electricity from/to grid	0.0036246
('ILCD 2.0 2018 midpoint', 'climate change', 'climate change total')	'ATR NG, HT+LT, + CCS (MDEA), 90 (average)' (megajoule, CH, None)	Water supply	2.27996e-05
('ILCD 2.0 2018 midpoint', 'climate change', 'climate change total')	'ATR NG, HT+LT, + CCS (MDEA), 90 (average)' (megajoule, CH, None)	Catalysts&adsorbents	9.76122e-05
('ILCD 2.0 2018 midpoint', 'climate change', 'climate change total')	'ATR NG, HT+LT, + CCS (MDEA), 90 (average)' (megajoule, CH, None)	CO2 transport and storage	0.000263872
('ILCD 2.0 2018 midpoint', 'climate change', 'climate change total')	'ATR NG, HT+LT, + CCS (MDEA), 90 (average)' (megajoule, CH, None)	Direct CO2 emissions	0.0105791
('ILCD 2.0 2018 midpoint', 'climate change', 'climate change total')	'ATR NG, HT+LT, + CCS (MDEA), 90 (average)' (megajoule, CH, None)	Emissions from fuel burning in furnace	0
('ILCD 2.0 2018 midpoint', 'climate change', 'climate change total')	'ATR BM, HT+LT, + CCS (MDEA), 98 (average), 25 bar' (megajoule, CH, None)	Fuel supply chain	-0.069347
('ILCD 2.0 2018 midpoint', 'climate change', 'climate change total')	'ATR BM, HT+LT, + CCS (MDEA), 98 (average), 25 bar' (megajoule, CH, None)	Plant infrastructure	0.000631279
('ILCD 2.0 2018 midpoint', 'climate change', 'climate change total')	'ATR BM, HT+LT, + CCS (MDEA), 98 (average), 25 bar' (megajoule, CH, None)	Electricity from/to grid	-0.000521807
('ILCD 2.0 2018 midpoint', 'climate change', 'climate change total')	'ATR BM, HT+LT, + CCS (MDEA), 98 (average), 25 bar' (megajoule, CH, None)	Water supply	2.27993e-05
('ILCD 2.0 2018 midpoint', 'climate change', 'climate change total')	'ATR BM, HT+LT, + CCS (MDEA), 98 (average), 25 bar' (megajoule, CH, None)	Catalysts&adsorbents	9.12173e-05
('ILCD 2.0 2018 midpoint', 'climate change', 'climate change total')	'ATR BM, HT+LT, + CCS (MDEA), 98 (average), 25 bar' (megajoule, CH, None)	CO2 transport and storage	0.000286444
('ILCD 2.0 2018 midpoint', 'climate change', 'climate change total')	'ATR BM, HT+LT, + CCS (MDEA), 98 (average), 25 bar' (megajoule, CH, None)	Direct CO2 emissions	0.0047197
('ILCD 2.0 2018 midpoint', 'climate change', 'climate change total')	'ATR BM, HT+LT, + CCS (MDEA), 98 (average), 25 bar' (megajoule, CH, None)	Emissions from fuel burning in furnace	0
('ILCD 2.0 2018 midpoint', 'climate change', 'climate change total')	'ATR NG, HT+LT, + CCS (VPSA), 98 (lower bound)' (megajoule, CH, None)	Fuel supply chain	0.0130785
('ILCD 2.0 2018 midpoint', 'climate change', 'climate change total')	'ATR NG, HT+LT, + CCS (VPSA), 98 (lower bound)' (megajoule, CH, None)	Plant infrastructure	0.000631301
('ILCD 2.0 2018 midpoint', 'climate change', 'climate change total')	'ATR NG, HT+LT, + CCS (VPSA), 98 (lower bound)' (megajoule, CH, None)	Electricity from/to grid	0.00533224
('ILCD 2.0 2018 midpoint', 'climate change', 'climate change total')	'ATR NG, HT+LT, + CCS (VPSA), 98 (lower bound)' (megajoule, CH, None)	Water supply	2.28001e-05
('ILCD 2.0 2018 midpoint', 'climate change', 'climate change total')	'ATR NG, HT+LT, + CCS (VPSA), 98 (lower bound)' (megajoule, CH, None)	Catalysts&adsorbents	9.12173e-05
('ILCD 2.0 2018 midpoint', 'climate change', 'climate change total')	'ATR NG, HT+LT, + CCS (VPSA), 98 (lower bound)' (megajoule, CH, None)	CO2 transport and storage	0.000293186
('ILCD 2.0 2018 midpoint', 'climate change', 'climate change total')	'ATR NG, HT+LT, + CCS (VPSA), 98 (lower bound)' (megajoule, CH, None)	Direct CO2 emissions	0.00157281
('ILCD 2.0 2018 midpoint', 'climate change', 'climate change total')	'ATR NG, HT+LT, + CCS (VPSA), 98 (lower bound)' (megajoule, CH, None)	Emissions from fuel burning in furnace	0
('ILCD 2.0 2018 midpoint', 'climate change', 'climate change total')	'ATR BM, HT+LT, + CCS (MDEA), 98 (average), maximum C uptake' (megajoule, CH, None)	Fuel supply chain	-0.150639
('ILCD 2.0 2018 midpoint', 'climate change', 'climate change total')	'ATR BM, HT+LT, + CCS (MDEA), 98 (average), maximum C uptake' (megajoule, CH, None)	Plant infrastructure	0.000631279
('ILCD 2.0 2018 midpoint', 'climate change', 'climate change total')	'ATR BM, HT+LT, + CCS (MDEA), 98 (average), maximum C uptake' (megajoule, CH, None)	Electricity from/to grid	0.00369263
('ILCD 2.0 2018 midpoint', 'climate change', 'climate change total')	'ATR BM, HT+LT, + CCS (MDEA), 98 (average), maximum C uptake' (megajoule, CH, None)	Water supply	2.27993e-05
('ILCD 2.0 2018 midpoint', 'climate change', 'climate change total')	'ATR BM, HT+LT, + CCS (MDEA), 98 (average), maximum C uptake' (megajoule, CH, None)	Catalysts&adsorbents	9.12173e-05
('ILCD 2.0 2018 midpoint', 'climate change', 'climate change total')	'ATR BM, HT+LT, + CCS (MDEA), 98 (average), maximum C uptake' (megajoule, CH, None)	CO2 transport and storage	0.000286444
('ILCD 2.0 2018 midpoint', 'climate change', 'climate change total')	'ATR BM, HT+LT, + CCS (MDEA), 98 (average), maximum C uptake' (megajoule, CH, None)	Direct CO2 emissions	0.0047197
('ILCD 2.0 2018 midpoint', 'climate change', 'climate change total')	'ATR BM, HT+LT, + CCS (MDEA), 98 (average), maximum C uptake' (megajoule, CH, None)	Emissions from fuel burning in furnace	0
('ILCD 2.0 2018 midpoint', 'climate change', 'climate change total')	'ATR BM, HT+LT, + CCS (VPSA), 98 (average), cut-off approach' (megajoule, CH, None)	Fuel supply chain	0.0841237
('ILCD 2.0 2018 midpoint', 'climate change', 'climate change total')	'ATR BM, HT+LT, + CCS (VPSA), 98 (average), cut-off approach' (megajoule, CH, None)	Plant infrastructure	0.000631278
('ILCD 2.0 2018 midpoint', 'climate change', 'climate change total')	'ATR BM, HT+LT, + CCS (VPSA), 98 (average), cut-off approach' (megajoule, CH, None)	Electricity from/to grid	0.00526943
('ILCD 2.0 2018 midpoint', 'climate change', 'climate change total')	'ATR BM, HT+LT, + CCS (VPSA), 98 (average), cut-off approach' (megajoule, CH, None)	Water supply	2.27992e-05
('ILCD 2.0 2018 midpoint', 'climate change', 'climate change total')	'ATR BM, HT+LT, + CCS (VPSA), 98 (average), cut-off approach' (megajoule, CH, None)	Catalysts&adsorbents	9.12173e-05
('ILCD 2.0 2018 midpoint', 'climate change', 'climate change total')	'ATR BM, HT+LT, + CCS (VPSA), 98 (average), cut-off approach' (megajoule, CH, None)	CO2 transport and storage	0.000293554
('ILCD 2.0 2018 midpoint', 'climate change', 'climate change total')	'ATR BM, HT+LT, + CCS (VPSA), 98 (average), cut-off approach' (megajoule, CH, None)	Direct CO2 emissions	0.0014239
('ILCD 2.0 2018 midpoint', 'climate change', 'climate change total')	'ATR BM, HT+LT, + CCS (VPSA), 98 (average), cut-off approach' (megajoule, CH, None)	Emissions from fuel burning in furnace	0
('ILCD 2.0 2018 midpoint', 'climate change', 'climate change total')	'SMR NG, HT+LT, + CCS (VPSA), 98 (average)' (megajoule, CH, None)	Fuel supply chain	0.0129348
('ILCD 2.0 2018 midpoint', 'climate change', 'climate change total')	'SMR NG, HT+LT, + CCS (VPSA), 98 (average)' (megajoule, CH, None)	Plant infrastructure	0.000631268
('ILCD 2.0 2018 midpoint', 'climate change', 'climate change total')	'SMR NG, HT+LT, + CCS (VPSA), 98 (average)' (megajoule, CH, None)	Water supply	2.27989e-05
('ILCD 2.0 2018 midpoint', 'climate change', 'climate change total')	'SMR NG, HT+LT, + CCS (VPSA), 98 (average)' (megajoule, CH, None)	Electricity from/to grid	0.00282255
('ILCD 2.0 2018 midpoint', 'climate change', 'climate change total')	'SMR NG, HT+LT, + CCS (VPSA), 98 (average)' (megajoule, CH, None)	Catalysts&adsorbents	9.12173e-05
('ILCD 2.0 2018 midpoint', 'climate change', 'climate change total')	'SMR NG, HT+LT, + CCS (VPSA), 98 (average)' (megajoule, CH, None)	CO2 transport and storage	0.000211924
('ILCD 2.0 2018 midpoint', 'climate change', 'climate change total')	'SMR NG, HT+LT, + CCS (VPSA), 98 (average)' (megajoule, CH, None)	Direct CO2 emissions	0.0215558
('ILCD 2.0 2018 midpoint', 'climate change', 'climate change total')	'SMR NG, HT+LT, + CCS (VPSA), 98 (average)' (megajoule, CH, None)	Emissions from fuel burning in furnace	2.89529e-05
('ILCD 2.0 2018 midpoint', 'climate change', 'climate change total')	'SMR NG/BM, HT+LT, 20:80 + CCS (MDEA), 98 (average), digestate incineration' (megajoule, CH, None)	Fuel supply chain	-0.0506659
('ILCD 2.0 2018 midpoint', 'climate change', 'climate change total')	'SMR NG/BM, HT+LT, 20:80 + CCS (MDEA), 98 (average), digestate incineration' (megajoule, CH, None)	Plant infrastructure	0.000631202
('ILCD 2.0 2018 midpoint', 'climate change', 'climate change total')	'SMR NG/BM, HT+LT, 20:80 + CCS (MDEA), 98 (average), digestate incineration' (megajoule, CH, None)	Water supply	2.27963e-05
('ILCD 2.0 2018 midpoint', 'climate change', 'climate change total')	'SMR NG/BM, HT+LT, 20:80 + CCS (MDEA), 98 (average), digestate incineration' (megajoule, CH, None)	Electricity from/to grid	0.00231544
('ILCD 2.0 2018 midpoint', 'climate change', 'climate change total')	'SMR NG/BM, HT+LT, 20:80 + CCS (MDEA), 98 (average), digestate incineration' (megajoule, CH, None)	Catalysts&adsorbents	9.63591e-05
('ILCD 2.0 2018 midpoint', 'climate change', 'climate change total')	'SMR NG/BM, HT+LT, 20:80 + CCS (MDEA), 98 (average), digestate incineration' (megajoule, CH, None)	CO2 transport and storage	0.000212166
('ILCD 2.0 2018 midpoint', 'climate change', 'climate change total')	'SMR NG/BM, HT+LT, 20:80 + CCS (MDEA), 98 (average), digestate incineration' (megajoule, CH, None)	Direct CO2 emissions	0.0217538
('ILCD 2.0 2018 midpoint', 'climate change', 'climate change total')	'SMR NG/BM, HT+LT, 20:80 + CCS (MDEA), 98 (average), digestate incineration' (megajoule, CH, None)	Emissions from fuel burning in furnace	2.49028e-05
('ILCD 2.0 2018 midpoint', 'climate change', 'climate change total')	'SMR NG, HT+LT, + CCS (MDEA), 98 (average), 100% BM, digestate incineration' (megajoule, CH, None)	Fuel supply chain	-0.0665444
('ILCD 2.0 2018 midpoint', 'climate change', 'climate change total')	'SMR NG, HT+LT, + CCS (MDEA), 98 (average), 100% BM, digestate incineration' (megajoule, CH, None)	Plant infrastructure	0.000631202
('ILCD 2.0 2018 midpoint', 'climate change', 'climate change total')	'SMR NG, HT+LT, + CCS (MDEA), 98 (average), 100% BM, digestate incineration' (megajoule, CH, None)	Water supply	2.27963e-05
('ILCD 2.0 2018 midpoint', 'climate change', 'climate change total')	'SMR NG, HT+LT, + CCS (MDEA), 98 (average), 100% BM, digestate incineration' (megajoule, CH, None)	Electricity from/to grid	0.00231544
('ILCD 2.0 2018 midpoint', 'climate change', 'climate change total')	'SMR NG, HT+LT, + CCS (MDEA), 98 (average), 100% BM, digestate incineration' (megajoule, CH, None)	Catalysts&adsorbents	9.63591e-05
('ILCD 2.0 2018 midpoint', 'climate change', 'climate change total')	'SMR NG, HT+LT, + CCS (MDEA), 98 (average), 100% BM, digestate incineration' (megajoule, CH, None)	CO2 transport and storage	0.000212166
('ILCD 2.0 2018 midpoint', 'climate change', 'climate change total')	'SMR NG, HT+LT, + CCS (MDEA), 98 (average), 100% BM, digestate incineration' (megajoule, CH, None)	Direct CO2 emissions	0.0217538
('ILCD 2.0 2018 midpoint', 'climate change', 'climate change total')	'SMR NG, HT+LT, + CCS (MDEA), 98 (average), 100% BM, digestate incineration' (megajoule, CH, None)	Emissions from fuel burning in furnace	2.49028e-05
('ILCD 2.0 2018 midpoint', 'climate change', 'climate change total')	'SMR NG, HT+LT, 25 bar' (megajoule, CH, None)	Fuel supply chain	0.0130703
('ILCD 2.0 2018 midpoint', 'climate change', 'climate change total')	'SMR NG, HT+LT, 25 bar' (megajoule, CH, None)	Plant infrastructure	0.00063127
('ILCD 2.0 2018 midpoint', 'climate change', 'climate change total')	'SMR NG, HT+LT, 25 bar' (megajoule, CH, None)	Water supply	2.2799e-05
('ILCD 2.0 2018 midpoint', 'climate change', 'climate change total')	'SMR NG, HT+LT, 25 bar' (megajoule, CH, None)	Electricity from/to grid	-0.00417256
('ILCD 2.0 2018 midpoint', 'climate change', 'climate change total')	'SMR NG, HT+LT, 25 bar' (megajoule, CH, None)	Catalysts&adsorbents	9.12173e-05
('ILCD 2.0 2018 midpoint', 'climate change', 'climate change total')	'SMR NG, HT+LT, 25 bar' (megajoule, CH, None)	Direct CO2 emissions	0.0743524
('ILCD 2.0 2018 midpoint', 'climate change', 'climate change total')	'SMR NG, HT+LT, 25 bar' (megajoule, CH, None)	Emissions from fuel burning in furnace	2.72511e-05
('ILCD 2.0 2018 midpoint', 'climate change', 'climate change total')	'SMR BM + CCS (MDEA), 90 (upper bound)' (megajoule, CH, None)	Fuel supply chain	-0.104288
('ILCD 2.0 2018 midpoint', 'climate change', 'climate change total')	'SMR BM + CCS (MDEA), 90 (upper bound)' (megajoule, CH, None)	Plant infrastructure	0.00063124
('ILCD 2.0 2018 midpoint', 'climate change', 'climate change total')	'SMR BM + CCS (MDEA), 90 (upper bound)' (megajoule, CH, None)	Water supply	2.27978e-05
('ILCD 2.0 2018 midpoint', 'climate change', 'climate change total')	'SMR BM + CCS (MDEA), 90 (upper bound)' (megajoule, CH, None)	Electricity from/to grid	0.000856224
('ILCD 2.0 2018 midpoint', 'climate change', 'climate change total')	'SMR BM + CCS (MDEA), 90 (upper bound)' (megajoule, CH, None)	Catalysts&adsorbents	9.52455e-05
('ILCD 2.0 2018 midpoint', 'climate change', 'climate change total')	'SMR BM + CCS (MDEA), 90 (upper bound)' (megajoule, CH, None)	CO2 transport and storage	0.000166214
('ILCD 2.0 2018 midpoint', 'climate change', 'climate change total')	'SMR BM + CCS (MDEA), 90 (upper bound)' (megajoule, CH, None)	Direct CO2 emissions	0.0331381
('ILCD 2.0 2018 midpoint', 'climate change', 'climate change total')	'SMR BM + CCS (MDEA), 90 (upper bound)' (megajoule, CH, None)	Emissions from fuel burning in furnace	1.89171e-05
('ILCD 2.0 2018 midpoint', 'climate change', 'climate change total')	'SMR BM + CCS (MDEA), 90 (lower bound)' (megajoule, CH, None)	Fuel supply chain	-0.104288
('ILCD 2.0 2018 midpoint', 'climate change', 'climate change total')	'SMR BM + CCS (MDEA), 90 (lower bound)' (megajoule, CH, None)	Plant infrastructure	0.00063124
('ILCD 2.0 2018 midpoint', 'climate change', 'climate change total')	'SMR BM + CCS (MDEA), 90 (lower bound)' (megajoule, CH, None)	Water supply	2.27978e-05
('ILCD 2.0 2018 midpoint', 'climate change', 'climate change total')	'SMR BM + CCS (MDEA), 90 (lower bound)' (megajoule, CH, None)	Electricity from/to grid	0.000829396
('ILCD 2.0 2018 midpoint', 'climate change', 'climate change total')	'SMR BM + CCS (MDEA), 90 (lower bound)' (megajoule, CH, None)	Catalysts&adsorbents	9.52455e-05
('ILCD 2.0 2018 midpoint', 'climate change', 'climate change total')	'SMR BM + CCS (MDEA), 90 (lower bound)' (megajoule, CH, None)	CO2 transport and storage	0.000166214
('ILCD 2.0 2018 midpoint', 'climate change', 'climate change total')	'SMR BM + CCS (MDEA), 90 (lower bound)' (megajoule, CH, None)	Direct CO2 emissions	0.0331381
('ILCD 2.0 2018 midpoint', 'climate change', 'climate change total')	'SMR BM + CCS (MDEA), 90 (lower bound)' (megajoule, CH, None)	Emissions from fuel burning in furnace	1.89171e-05
('ILCD 2.0 2018 midpoint', 'climate change', 'climate change total')	'SMR NG, HT+LT, + CCS (MDEA), 90 (average)' (megajoule, CH, None)	Fuel supply chain	0.0128601
('ILCD 2.0 2018 midpoint', 'climate change', 'climate change total')	'SMR NG, HT+LT, + CCS (MDEA), 90 (average)' (megajoule, CH, None)	Plant infrastructure	0.000631202
('ILCD 2.0 2018 midpoint', 'climate change', 'climate change total')	'SMR NG, HT+LT, + CCS (MDEA), 90 (average)' (megajoule, CH, None)	Water supply	2.27963e-05
('ILCD 2.0 2018 midpoint', 'climate change', 'climate change total')	'SMR NG, HT+LT, + CCS (MDEA), 90 (average)' (megajoule, CH, None)	Electricity from/to grid	0.00167125
('ILCD 2.0 2018 midpoint', 'climate change', 'climate change total')	'SMR NG, HT+LT, + CCS (MDEA), 90 (average)' (megajoule, CH, None)	Catalysts&adsorbents	9.5945e-05
('ILCD 2.0 2018 midpoint', 'climate change', 'climate change total')	'SMR NG, HT+LT, + CCS (MDEA), 90 (average)' (megajoule, CH, None)	CO2 transport and storage	0.000195079
('ILCD 2.0 2018 midpoint', 'climate change', 'climate change total')	'SMR NG, HT+LT, + CCS (MDEA), 90 (average)' (megajoule, CH, None)	Direct CO2 emissions	0.025994
('ILCD 2.0 2018 midpoint', 'climate change', 'climate change total')	'SMR NG, HT+LT, + CCS (MDEA), 90 (average)' (megajoule, CH, None)	Emissions from fuel burning in furnace	2.50276e-05
('ILCD 2.0 2018 midpoint', 'climate change', 'climate change total')	'SMR BM, HT+LT' (megajoule, CH, None)	Fuel supply chain	-0.105617
('ILCD 2.0 2018 midpoint', 'climate change', 'climate change total')	'SMR BM, HT+LT' (megajoule, CH, None)	Plant infrastructure	0.00063127
('ILCD 2.0 2018 midpoint', 'climate change', 'climate change total')	'SMR BM, HT+LT' (megajoule, CH, None)	Water supply	2.2799e-05
('ILCD 2.0 2018 midpoint', 'climate change', 'climate change total')	'SMR BM, HT+LT' (megajoule, CH, None)	Electricity from/to grid	-0.000189262
('ILCD 2.0 2018 midpoint', 'climate change', 'climate change total')	'SMR BM, HT+LT' (megajoule, CH, None)	Catalysts&adsorbents	9.12173e-05
('ILCD 2.0 2018 midpoint', 'climate change', 'climate change total')	'SMR BM, HT+LT' (megajoule, CH, None)	Direct CO2 emissions	0.0742943
('ILCD 2.0 2018 midpoint', 'climate change', 'climate change total')	'SMR BM, HT+LT' (megajoule, CH, None)	Emissions from fuel burning in furnace	2.81718e-05
('ILCD 2.0 2018 midpoint', 'climate change', 'climate change total')	'SMR NG, HT+LT, + CCS (MDEA), 98 (upper bound)' (megajoule, CH, None)	Fuel supply chain	0.0128484
('ILCD 2.0 2018 midpoint', 'climate change', 'climate change total')	'SMR NG, HT+LT, + CCS (MDEA), 98 (upper bound)' (megajoule, CH, None)	Plant infrastructure	0.000631202
('ILCD 2.0 2018 midpoint', 'climate change', 'climate change total')	'SMR NG, HT+LT, + CCS (MDEA), 98 (upper bound)' (megajoule, CH, None)	Water supply	2.27963e-05
('ILCD 2.0 2018 midpoint', 'climate change', 'climate change total')	'SMR NG, HT+LT, + CCS (MDEA), 98 (upper bound)' (megajoule, CH, None)	Electricity from/to grid	0.0023281
('ILCD 2.0 2018 midpoint', 'climate change', 'climate change total')	'SMR NG, HT+LT, + CCS (MDEA), 98 (upper bound)' (megajoule, CH, None)	Catalysts&adsorbents	9.63591e-05
('ILCD 2.0 2018 midpoint', 'climate change', 'climate change total')	'SMR NG, HT+LT, + CCS (MDEA), 98 (upper bound)' (megajoule, CH, None)	CO2 transport and storage	0.000212166
('ILCD 2.0 2018 midpoint', 'climate change', 'climate change total')	'SMR NG, HT+LT, + CCS (MDEA), 98 (upper bound)' (megajoule, CH, None)	Direct CO2 emissions	0.0217538
('ILCD 2.0 2018 midpoint', 'climate change', 'climate change total')	'SMR NG, HT+LT, + CCS (MDEA), 98 (upper bound)' (megajoule, CH, None)	Emissions from fuel burning in furnace	2.49028e-05
('ILCD 2.0 2018 midpoint', 'climate change', 'climate change total')	'SMR NG/BM, HT+LT, 30:70 + CCS (MDEA), 98 (average), digestate incineration' (megajoule, CH, None)	Fuel supply chain	-0.0427266
('ILCD 2.0 2018 midpoint', 'climate change', 'climate change total')	'SMR NG/BM, HT+LT, 30:70 + CCS (MDEA), 98 (average), digestate incineration' (megajoule, CH, None)	Plant infrastructure	0.000631202
('ILCD 2.0 2018 midpoint', 'climate change', 'climate change total')	'SMR NG/BM, HT+LT, 30:70 + CCS (MDEA), 98 (average), digestate incineration' (megajoule, CH, None)	Water supply	2.27963e-05
('ILCD 2.0 2018 midpoint', 'climate change', 'climate change total')	'SMR NG/BM, HT+LT, 30:70 + CCS (MDEA), 98 (average), digestate incineration' (megajoule, CH, None)	Electricity from/to grid	0.00231544
('ILCD 2.0 2018 midpoint', 'climate change', 'climate change total')	'SMR NG/BM, HT+LT, 30:70 + CCS (MDEA), 98 (average), digestate incineration' (megajoule, CH, None)	Catalysts&adsorbents	9.63591e-05
('ILCD 2.0 2018 midpoint', 'climate change', 'climate change total')	'SMR NG/BM, HT+LT, 30:70 + CCS (MDEA), 98 (average), digestate incineration' (megajoule, CH, None)	CO2 transport and storage	0.000212166
('ILCD 2.0 2018 midpoint', 'climate change', 'climate change total')	'SMR NG/BM, HT+LT, 30:70 + CCS (MDEA), 98 (average), digestate incineration' (megajoule, CH, None)	Direct CO2 emissions	0.0217538
('ILCD 2.0 2018 midpoint', 'climate change', 'climate change total')	'SMR NG/BM, HT+LT, 30:70 + CCS (MDEA), 98 (average), digestate incineration' (megajoule, CH, None)	Emissions from fuel burning in furnace	2.49028e-05
('ILCD 2.0 2018 midpoint', 'climate change', 'climate change total')	'SMR NG, HT+LT, + CCS (MDEA), 98 (average), 700 bar' (megajoule, CH, None)	Fuel supply chain	0.0128484
('ILCD 2.0 2018 midpoint', 'climate change', 'climate change total')	'SMR NG, HT+LT, + CCS (MDEA), 98 (average), 700 bar' (megajoule, CH, None)	Plant infrastructure	0.000631202
('ILCD 2.0 2018 midpoint', 'climate change', 'climate change total')	'SMR NG, HT+LT, + CCS (MDEA), 98 (average), 700 bar' (megajoule, CH, None)	Water supply	2.27963e-05
('ILCD 2.0 2018 midpoint', 'climate change', 'climate change total')	'SMR NG, HT+LT, + CCS (MDEA), 98 (average), 700 bar' (megajoule, CH, None)	Electricity from/to grid	0.011005
('ILCD 2.0 2018 midpoint', 'climate change', 'climate change total')	'SMR NG, HT+LT, + CCS (MDEA), 98 (average), 700 bar' (megajoule, CH, None)	Catalysts&adsorbents	9.63591e-05
('ILCD 2.0 2018 midpoint', 'climate change', 'climate change total')	'SMR NG, HT+LT, + CCS (MDEA), 98 (average), 700 bar' (megajoule, CH, None)	CO2 transport and storage	0.000212166
('ILCD 2.0 2018 midpoint', 'climate change', 'climate change total')	'SMR NG, HT+LT, + CCS (MDEA), 98 (average), 700 bar' (megajoule, CH, None)	Direct CO2 emissions	0.0217538
('ILCD 2.0 2018 midpoint', 'climate change', 'climate change total')	'SMR NG, HT+LT, + CCS (MDEA), 98 (average), 700 bar' (megajoule, CH, None)	Emissions from fuel burning in furnace	2.49028e-05
('ILCD 2.0 2018 midpoint', 'climate change', 'climate change total')	'SMR NG/BM, HT+LT, 5:95 + CCS (MDEA), 98 (average)' (megajoule, CH, None)	Fuel supply chain	-0.095306
('ILCD 2.0 2018 midpoint', 'climate change', 'climate change total')	'SMR NG/BM, HT+LT, 5:95 + CCS (MDEA), 98 (average)' (megajoule, CH, None)	Plant infrastructure	0.000631202
('ILCD 2.0 2018 midpoint', 'climate change', 'climate change total')	'SMR NG/BM, HT+LT, 5:95 + CCS (MDEA), 98 (average)' (megajoule, CH, None)	Water supply	2.27963e-05
('ILCD 2.0 2018 midpoint', 'climate change', 'climate change total')	'SMR NG/BM, HT+LT, 5:95 + CCS (MDEA), 98 (average)' (megajoule, CH, None)	Electricity from/to grid	0.00231544
('ILCD 2.0 2018 midpoint', 'climate change', 'climate change total')	'SMR NG/BM, HT+LT, 5:95 + CCS (MDEA), 98 (average)' (megajoule, CH, None)	Catalysts&adsorbents	9.63591e-05
('ILCD 2.0 2018 midpoint', 'climate change', 'climate change total')	'SMR NG/BM, HT+LT, 5:95 + CCS (MDEA), 98 (average)' (megajoule, CH, None)	CO2 transport and storage	0.000212166
('ILCD 2.0 2018 midpoint', 'climate change', 'climate change total')	'SMR NG/BM, HT+LT, 5:95 + CCS (MDEA), 98 (average)' (megajoule, CH, None)	Direct CO2 emissions	0.0217538
('ILCD 2.0 2018 midpoint', 'climate change', 'climate change total')	'SMR NG/BM, HT+LT, 5:95 + CCS (MDEA), 98 (average)' (megajoule, CH, None)	Emissions from fuel burning in furnace	2.49028e-05
('ILCD 2.0 2018 midpoint', 'climate change', 'climate change total')	'SMR NG, HT+LT, + CCS (VPSA), 98 (upper bound)' (megajoule, CH, None)	Fuel supply chain	0.0129517
('ILCD 2.0 2018 midpoint', 'climate change', 'climate change total')	'SMR NG, HT+LT, + CCS (VPSA), 98 (upper bound)' (megajoule, CH, None)	Plant infrastructure	0.000631251
('ILCD 2.0 2018 midpoint', 'climate change', 'climate change total')	'SMR NG, HT+LT, + CCS (VPSA), 98 (upper bound)' (megajoule, CH, None)	Water supply	2.27982e-05
('ILCD 2.0 2018 midpoint', 'climate change', 'climate change total')	'SMR NG, HT+LT, + CCS (VPSA), 98 (upper bound)' (megajoule, CH, None)	Electricity from/to grid	0.00303991
('ILCD 2.0 2018 midpoint', 'climate change', 'climate change total')	'SMR NG, HT+LT, + CCS (VPSA), 98 (upper bound)' (megajoule, CH, None)	Catalysts&adsorbents	9.12173e-05
('ILCD 2.0 2018 midpoint', 'climate change', 'climate change total')	'SMR NG, HT+LT, + CCS (VPSA), 98 (upper bound)' (megajoule, CH, None)	CO2 transport and storage	0.000213248
('ILCD 2.0 2018 midpoint', 'climate change', 'climate change total')	'SMR NG, HT+LT, + CCS (VPSA), 98 (upper bound)' (megajoule, CH, None)	Direct CO2 emissions	0.0212734
('ILCD 2.0 2018 midpoint', 'climate change', 'climate change total')	'SMR NG, HT+LT, + CCS (VPSA), 98 (upper bound)' (megajoule, CH, None)	Emissions from fuel burning in furnace	2.81205e-05
('ILCD 2.0 2018 midpoint', 'climate change', 'climate change total')	'SMR BM + CCS (MDEA), 98 (upper bound)' (megajoule, CH, None)	Fuel supply chain	-0.103877
('ILCD 2.0 2018 midpoint', 'climate change', 'climate change total')	'SMR BM + CCS (MDEA), 98 (upper bound)' (megajoule, CH, None)	Plant infrastructure	0.000631271
('ILCD 2.0 2018 midpoint', 'climate change', 'climate change total')	'SMR BM + CCS (MDEA), 98 (upper bound)' (megajoule, CH, None)	Water supply	2.2799e-05
('ILCD 2.0 2018 midpoint', 'climate change', 'climate change total')	'SMR BM + CCS (MDEA), 98 (upper bound)' (megajoule, CH, None)	Electricity from/to grid	0.00131529
('ILCD 2.0 2018 midpoint', 'climate change', 'climate change total')	'SMR BM + CCS (MDEA), 98 (upper bound)' (megajoule, CH, None)	Catalysts&adsorbents	9.56024e-05
('ILCD 2.0 2018 midpoint', 'climate change', 'climate change total')	'SMR BM + CCS (MDEA), 98 (upper bound)' (megajoule, CH, None)	CO2 transport and storage	0.00018094
('ILCD 2.0 2018 midpoint', 'climate change', 'climate change total')	'SMR BM + CCS (MDEA), 98 (upper bound)' (megajoule, CH, None)	Direct CO2 emissions	0.0293394
('ILCD 2.0 2018 midpoint', 'climate change', 'climate change total')	'SMR BM + CCS (MDEA), 98 (upper bound)' (megajoule, CH, None)	Emissions from fuel burning in furnace	1.83675e-05
('ILCD 2.0 2018 midpoint', 'climate change', 'climate change total')	'SMR BM, HT+LT, + CCS (VPSA), 98 (average), upper bound C sequestration' (megajoule, CH, None)	Fuel supply chain	-0.149067
('ILCD 2.0 2018 midpoint', 'climate change', 'climate change total')	'SMR BM, HT+LT, + CCS (VPSA), 98 (average), upper bound C sequestration' (megajoule, CH, None)	Plant infrastructure	0.000631292
('ILCD 2.0 2018 midpoint', 'climate change', 'climate change total')	'SMR BM, HT+LT, + CCS (VPSA), 98 (average), upper bound C sequestration' (megajoule, CH, None)	Water supply	2.27998e-05
('ILCD 2.0 2018 midpoint', 'climate change', 'climate change total')	'SMR BM, HT+LT, + CCS (VPSA), 98 (average), upper bound C sequestration' (megajoule, CH, None)	Electricity from/to grid	0.0026698
('ILCD 2.0 2018 midpoint', 'climate change', 'climate change total')	'SMR BM, HT+LT, + CCS (VPSA), 98 (average), upper bound C sequestration' (megajoule, CH, None)	Catalysts&adsorbents	9.12173e-05
('ILCD 2.0 2018 midpoint', 'climate change', 'climate change total')	'SMR BM, HT+LT, + CCS (VPSA), 98 (average), upper bound C sequestration' (megajoule, CH, None)	CO2 transport and storage	0.000210588
('ILCD 2.0 2018 midpoint', 'climate change', 'climate change total')	'SMR BM, HT+LT, + CCS (VPSA), 98 (average), upper bound C sequestration' (megajoule, CH, None)	Direct CO2 emissions	0.0217244
('ILCD 2.0 2018 midpoint', 'climate change', 'climate change total')	'SMR BM, HT+LT, + CCS (VPSA), 98 (average), upper bound C sequestration' (megajoule, CH, None)	Emissions from fuel burning in furnace	2.86676e-05
('ILCD 2.0 2018 midpoint', 'climate change', 'climate change total')	'SMR BM, HT+LT, cut-off approach' (megajoule, CH, None)	Fuel supply chain	0.0840005
('ILCD 2.0 2018 midpoint', 'climate change', 'climate change total')	'SMR BM, HT+LT, cut-off approach' (megajoule, CH, None)	Plant infrastructure	0.00063127
('ILCD 2.0 2018 midpoint', 'climate change', 'climate change total')	'SMR BM, HT+LT, cut-off approach' (megajoule, CH, None)	Water supply	2.2799e-05
('ILCD 2.0 2018 midpoint', 'climate change', 'climate change total')	'SMR BM, HT+LT, cut-off approach' (megajoule, CH, None)	Electricity from/to grid	-0.000189262
('ILCD 2.0 2018 midpoint', 'climate change', 'climate change total')	'SMR BM, HT+LT, cut-off approach' (megajoule, CH, None)	Catalysts&adsorbents	9.12173e-05
('ILCD 2.0 2018 midpoint', 'climate change', 'climate change total')	'SMR BM, HT+LT, cut-off approach' (megajoule, CH, None)	Direct CO2 emissions	0.0742943
('ILCD 2.0 2018 midpoint', 'climate change', 'climate change total')	'SMR BM, HT+LT, cut-off approach' (megajoule, CH, None)	Emissions from fuel burning in furnace	2.81718e-05
('ILCD 2.0 2018 midpoint', 'climate change', 'climate change total')	'SMR BM, HT+LT, + CCS (VPSA), 98 (average)' (megajoule, CH, None)	Fuel supply chain	-0.104153
('ILCD 2.0 2018 midpoint', 'climate change', 'climate change total')	'SMR BM, HT+LT, + CCS (VPSA), 98 (average)' (megajoule, CH, None)	Plant infrastructure	0.000631292
('ILCD 2.0 2018 midpoint', 'climate change', 'climate change total')	'SMR BM, HT+LT, + CCS (VPSA), 98 (average)' (megajoule, CH, None)	Water supply	2.27998e-05
('ILCD 2.0 2018 midpoint', 'climate change', 'climate change total')	'SMR BM, HT+LT, + CCS (VPSA), 98 (average)' (megajoule, CH, None)	Electricity from/to grid	0.0026698
('ILCD 2.0 2018 midpoint', 'climate change', 'climate change total')	'SMR BM, HT+LT, + CCS (VPSA), 98 (average)' (megajoule, CH, None)	Catalysts&adsorbents	9.12173e-05
('ILCD 2.0 2018 midpoint', 'climate change', 'climate change total')	'SMR BM, HT+LT, + CCS (VPSA), 98 (average)' (megajoule, CH, None)	CO2 transport and storage	0.000210588
('ILCD 2.0 2018 midpoint', 'climate change', 'climate change total')	'SMR BM, HT+LT, + CCS (VPSA), 98 (average)' (megajoule, CH, None)	Direct CO2 emissions	0.0217244
('ILCD 2.0 2018 midpoint', 'climate change', 'climate change total')	'SMR BM, HT+LT, + CCS (VPSA), 98 (average)' (megajoule, CH, None)	Emissions from fuel burning in furnace	2.86676e-05
('ILCD 2.0 2018 midpoint', 'climate change', 'climate change total')	'SMR NG, HT+LT' (megajoule, CH, None)	Fuel supply chain	0.0130703
('ILCD 2.0 2018 midpoint', 'climate change', 'climate change total')	'SMR NG, HT+LT' (megajoule, CH, None)	Plant infrastructure	0.00063127
('ILCD 2.0 2018 midpoint', 'climate change', 'climate change total')	'SMR NG, HT+LT' (megajoule, CH, None)	Water supply	2.2799e-05
('ILCD 2.0 2018 midpoint', 'climate change', 'climate change total')	'SMR NG, HT+LT' (megajoule, CH, None)	Electricity from/to grid	4.18934e-05
('ILCD 2.0 2018 midpoint', 'climate change', 'climate change total')	'SMR NG, HT+LT' (megajoule, CH, None)	Catalysts&adsorbents	9.12173e-05
('ILCD 2.0 2018 midpoint', 'climate change', 'climate change total')	'SMR NG, HT+LT' (megajoule, CH, None)	Direct CO2 emissions	0.0743524
('ILCD 2.0 2018 midpoint', 'climate change', 'climate change total')	'SMR NG, HT+LT' (megajoule, CH, None)	Emissions from fuel burning in furnace	2.72511e-05
('ILCD 2.0 2018 midpoint', 'climate change', 'climate change total')	'SMR NG/BM, HT+LT, 40:60 + CCS (MDEA), 98 (average)' (megajoule, CH, None)	Fuel supply chain	-0.0554596
('ILCD 2.0 2018 midpoint', 'climate change', 'climate change total')	'SMR NG/BM, HT+LT, 40:60 + CCS (MDEA), 98 (average)' (megajoule, CH, None)	Plant infrastructure	0.000631202
('ILCD 2.0 2018 midpoint', 'climate change', 'climate change total')	'SMR NG/BM, HT+LT, 40:60 + CCS (MDEA), 98 (average)' (megajoule, CH, None)	Water supply	2.27963e-05
('ILCD 2.0 2018 midpoint', 'climate change', 'climate change total')	'SMR NG/BM, HT+LT, 40:60 + CCS (MDEA), 98 (average)' (megajoule, CH, None)	Electricity from/to grid	0.00231544
('ILCD 2.0 2018 midpoint', 'climate change', 'climate change total')	'SMR NG/BM, HT+LT, 40:60 + CCS (MDEA), 98 (average)' (megajoule, CH, None)	Catalysts&adsorbents	9.63591e-05
('ILCD 2.0 2018 midpoint', 'climate change', 'climate change total')	'SMR NG/BM, HT+LT, 40:60 + CCS (MDEA), 98 (average)' (megajoule, CH, None)	CO2 transport and storage	0.000212166
('ILCD 2.0 2018 midpoint', 'climate change', 'climate change total')	'SMR NG/BM, HT+LT, 40:60 + CCS (MDEA), 98 (average)' (megajoule, CH, None)	Direct CO2 emissions	0.0217538
('ILCD 2.0 2018 midpoint', 'climate change', 'climate change total')	'SMR NG/BM, HT+LT, 40:60 + CCS (MDEA), 98 (average)' (megajoule, CH, None)	Emissions from fuel burning in furnace	2.49028e-05
('ILCD 2.0 2018 midpoint', 'climate change', 'climate change total')	'SMR NG' (megajoule, CH, None)	Fuel supply chain	0.0129906
('ILCD 2.0 2018 midpoint', 'climate change', 'climate change total')	'SMR NG' (megajoule, CH, None)	Plant infrastructure	0.00063127
('ILCD 2.0 2018 midpoint', 'climate change', 'climate change total')	'SMR NG' (megajoule, CH, None)	Water supply	2.2799e-05
('ILCD 2.0 2018 midpoint', 'climate change', 'climate change total')	'SMR NG' (megajoule, CH, None)	Electricity from/to grid	-0.000467437
('ILCD 2.0 2018 midpoint', 'climate change', 'climate change total')	'SMR NG' (megajoule, CH, None)	Catalysts&adsorbents	9.12173e-05
('ILCD 2.0 2018 midpoint', 'climate change', 'climate change total')	'SMR NG' (megajoule, CH, None)	Direct CO2 emissions	0.0746243
('ILCD 2.0 2018 midpoint', 'climate change', 'climate change total')	'SMR NG' (megajoule, CH, None)	Emissions from fuel burning in furnace	1.85833e-05
('ILCD 2.0 2018 midpoint', 'climate change', 'climate change total')	'SMR BM, HT+LT, + CCS (MDEA), 98 (upper bound)' (megajoule, CH, None)	Fuel supply chain	-0.103519
('ILCD 2.0 2018 midpoint', 'climate change', 'climate change total')	'SMR BM, HT+LT, + CCS (MDEA), 98 (upper bound)' (megajoule, CH, None)	Plant infrastructure	0.000631272
('ILCD 2.0 2018 midpoint', 'climate change', 'climate change total')	'SMR BM, HT+LT, + CCS (MDEA), 98 (upper bound)' (megajoule, CH, None)	Water supply	2.2799e-05
('ILCD 2.0 2018 midpoint', 'climate change', 'climate change total')	'SMR BM, HT+LT, + CCS (MDEA), 98 (upper bound)' (megajoule, CH, None)	Electricity from/to grid	0.00223939
('ILCD 2.0 2018 midpoint', 'climate change', 'climate change total')	'SMR BM, HT+LT, + CCS (MDEA), 98 (upper bound)' (megajoule, CH, None)	Catalysts&adsorbents	9.63495e-05
('ILCD 2.0 2018 midpoint', 'climate change', 'climate change total')	'SMR BM, HT+LT, + CCS (MDEA), 98 (upper bound)' (megajoule, CH, None)	CO2 transport and storage	0.000211771
('ILCD 2.0 2018 midpoint', 'climate change', 'climate change total')	'SMR BM, HT+LT, + CCS (MDEA), 98 (upper bound)' (megajoule, CH, None)	Direct CO2 emissions	0.0215704
('ILCD 2.0 2018 midpoint', 'climate change', 'climate change total')	'SMR BM, HT+LT, + CCS (MDEA), 98 (upper bound)' (megajoule, CH, None)	Emissions from fuel burning in furnace	2.53969e-05
('ILCD 2.0 2018 midpoint', 'climate change', 'climate change total')	'SMR NG/BM, HT+LT, 65:35 + CCS (MDEA), 98 (average)' (megajoule, CH, None)	Fuel supply chain	-0.0269979
('ILCD 2.0 2018 midpoint', 'climate change', 'climate change total')	'SMR NG/BM, HT+LT, 65:35 + CCS (MDEA), 98 (average)' (megajoule, CH, None)	Plant infrastructure	0.000631202
('ILCD 2.0 2018 midpoint', 'climate change', 'climate change total')	'SMR NG/BM, HT+LT, 65:35 + CCS (MDEA), 98 (average)' (megajoule, CH, None)	Water supply	2.27963e-05
('ILCD 2.0 2018 midpoint', 'climate change', 'climate change total')	'SMR NG/BM, HT+LT, 65:35 + CCS (MDEA), 98 (average)' (megajoule, CH, None)	Electricity from/to grid	0.00231544
('ILCD 2.0 2018 midpoint', 'climate change', 'climate change total')	'SMR NG/BM, HT+LT, 65:35 + CCS (MDEA), 98 (average)' (megajoule, CH, None)	Catalysts&adsorbents	9.63591e-05
('ILCD 2.0 2018 midpoint', 'climate change', 'climate change total')	'SMR NG/BM, HT+LT, 65:35 + CCS (MDEA), 98 (average)' (megajoule, CH, None)	CO2 transport and storage	0.000212166
('ILCD 2.0 2018 midpoint', 'climate change', 'climate change total')	'SMR NG/BM, HT+LT, 65:35 + CCS (MDEA), 98 (average)' (megajoule, CH, None)	Direct CO2 emissions	0.0217538
('ILCD 2.0 2018 midpoint', 'climate change', 'climate change total')	'SMR NG/BM, HT+LT, 65:35 + CCS (MDEA), 98 (average)' (megajoule, CH, None)	Emissions from fuel burning in furnace	2.49028e-05
('ILCD 2.0 2018 midpoint', 'climate change', 'climate change total')	'SMR NG + CCS (MDEA), 90 (upper bound)' (megajoule, CH, None)	Fuel supply chain	0.0129439
('ILCD 2.0 2018 midpoint', 'climate change', 'climate change total')	'SMR NG + CCS (MDEA), 90 (upper bound)' (megajoule, CH, None)	Plant infrastructure	0.000631278
('ILCD 2.0 2018 midpoint', 'climate change', 'climate change total')	'SMR NG + CCS (MDEA), 90 (upper bound)' (megajoule, CH, None)	Water supply	2.27992e-05
('ILCD 2.0 2018 midpoint', 'climate change', 'climate change total')	'SMR NG + CCS (MDEA), 90 (upper bound)' (megajoule, CH, None)	Electricity from/to grid	0.000880985
('ILCD 2.0 2018 midpoint', 'climate change', 'climate change total')	'SMR NG + CCS (MDEA), 90 (upper bound)' (megajoule, CH, None)	Catalysts&adsorbents	9.52375e-05
('ILCD 2.0 2018 midpoint', 'climate change', 'climate change total')	'SMR NG + CCS (MDEA), 90 (upper bound)' (megajoule, CH, None)	CO2 transport and storage	0.000165885
('ILCD 2.0 2018 midpoint', 'climate change', 'climate change total')	'SMR NG + CCS (MDEA), 90 (upper bound)' (megajoule, CH, None)	Direct CO2 emissions	0.0335096
('ILCD 2.0 2018 midpoint', 'climate change', 'climate change total')	'SMR NG + CCS (MDEA), 90 (upper bound)' (megajoule, CH, None)	Emissions from fuel burning in furnace	1.80837e-05
('ILCD 2.0 2018 midpoint', 'climate change', 'climate change total')	'SMR BM, HT+LT, + CCS (MDEA), 90 (average)' (megajoule, CH, None)	Fuel supply chain	-0.103723
('ILCD 2.0 2018 midpoint', 'climate change', 'climate change total')	'SMR BM, HT+LT, + CCS (MDEA), 90 (average)' (megajoule, CH, None)	Plant infrastructure	0.000631272
('ILCD 2.0 2018 midpoint', 'climate change', 'climate change total')	'SMR BM, HT+LT, + CCS (MDEA), 90 (average)' (megajoule, CH, None)	Water supply	2.2799e-05
('ILCD 2.0 2018 midpoint', 'climate change', 'climate change total')	'SMR BM, HT+LT, + CCS (MDEA), 90 (average)' (megajoule, CH, None)	Electricity from/to grid	0.00190001
('ILCD 2.0 2018 midpoint', 'climate change', 'climate change total')	'SMR BM, HT+LT, + CCS (MDEA), 90 (average)' (megajoule, CH, None)	Catalysts&adsorbents	9.59341e-05
('ILCD 2.0 2018 midpoint', 'climate change', 'climate change total')	'SMR BM, HT+LT, + CCS (MDEA), 90 (average)' (megajoule, CH, None)	CO2 transport and storage	0.000194627
('ILCD 2.0 2018 midpoint', 'climate change', 'climate change total')	'SMR BM, HT+LT, + CCS (MDEA), 90 (average)' (megajoule, CH, None)	Direct CO2 emissions	0.0264145
('ILCD 2.0 2018 midpoint', 'climate change', 'climate change total')	'SMR BM, HT+LT, + CCS (MDEA), 90 (average)' (megajoule, CH, None)	Emissions from fuel burning in furnace	2.56673e-05
('ILCD 2.0 2018 midpoint', 'climate change', 'climate change total')	'SMR BM, HT+LT, +CCS (VPSA), 98 (average), hydropower electricity' (megajoule, CH, None)	Fuel supply chain	-0.104153
('ILCD 2.0 2018 midpoint', 'climate change', 'climate change total')	'SMR BM, HT+LT, +CCS (VPSA), 98 (average), hydropower electricity' (megajoule, CH, None)	Plant infrastructure	0.000631292
('ILCD 2.0 2018 midpoint', 'climate change', 'climate change total')	'SMR BM, HT+LT, +CCS (VPSA), 98 (average), hydropower electricity' (megajoule, CH, None)	Water supply	2.27998e-05
('ILCD 2.0 2018 midpoint', 'climate change', 'climate change total')	'SMR BM, HT+LT, +CCS (VPSA), 98 (average), hydropower electricity' (megajoule, CH, None)	Electricity from/to grid	4.11412e-05
('ILCD 2.0 2018 midpoint', 'climate change', 'climate change total')	'SMR BM, HT+LT, +CCS (VPSA), 98 (average), hydropower electricity' (megajoule, CH, None)	Catalysts&adsorbents	9.12173e-05
('ILCD 2.0 2018 midpoint', 'climate change', 'climate change total')	'SMR BM, HT+LT, +CCS (VPSA), 98 (average), hydropower electricity' (megajoule, CH, None)	CO2 transport and storage	0.000210588
('ILCD 2.0 2018 midpoint', 'climate change', 'climate change total')	'SMR BM, HT+LT, +CCS (VPSA), 98 (average), hydropower electricity' (megajoule, CH, None)	Direct CO2 emissions	0.0217244
('ILCD 2.0 2018 midpoint', 'climate change', 'climate change total')	'SMR BM, HT+LT, +CCS (VPSA), 98 (average), hydropower electricity' (megajoule, CH, None)	Emissions from fuel burning in furnace	2.86676e-05
('ILCD 2.0 2018 midpoint', 'climate change', 'climate change total')	'SMR BM, HT+LT, + CCS (MDEA), 90 (upper bound)' (megajoule, CH, None)	Fuel supply chain	-0.103723
('ILCD 2.0 2018 midpoint', 'climate change', 'climate change total')	'SMR BM, HT+LT, + CCS (MDEA), 90 (upper bound)' (megajoule, CH, None)	Plant infrastructure	0.000631272
('ILCD 2.0 2018 midpoint', 'climate change', 'climate change total')	'SMR BM, HT+LT, + CCS (MDEA), 90 (upper bound)' (megajoule, CH, None)	Water supply	2.2799e-05
('ILCD 2.0 2018 midpoint', 'climate change', 'climate change total')	'SMR BM, HT+LT, + CCS (MDEA), 90 (upper bound)' (megajoule, CH, None)	Electricity from/to grid	0.00191339
('ILCD 2.0 2018 midpoint', 'climate change', 'climate change total')	'SMR BM, HT+LT, + CCS (MDEA), 90 (upper bound)' (megajoule, CH, None)	Catalysts&adsorbents	9.59341e-05
('ILCD 2.0 2018 midpoint', 'climate change', 'climate change total')	'SMR BM, HT+LT, + CCS (MDEA), 90 (upper bound)' (megajoule, CH, None)	CO2 transport and storage	0.000194627
('ILCD 2.0 2018 midpoint', 'climate change', 'climate change total')	'SMR BM, HT+LT, + CCS (MDEA), 90 (upper bound)' (megajoule, CH, None)	Direct CO2 emissions	0.0264145
('ILCD 2.0 2018 midpoint', 'climate change', 'climate change total')	'SMR BM, HT+LT, + CCS (MDEA), 90 (upper bound)' (megajoule, CH, None)	Emissions from fuel burning in furnace	2.56673e-05
('ILCD 2.0 2018 midpoint', 'climate change', 'climate change total')	'SMR NG + CCS (VPSA), 98 (average)' (megajoule, CH, None)	Fuel supply chain	0.0129436
('ILCD 2.0 2018 midpoint', 'climate change', 'climate change total')	'SMR NG + CCS (VPSA), 98 (average)' (megajoule, CH, None)	Plant infrastructure	0.000631279
('ILCD 2.0 2018 midpoint', 'climate change', 'climate change total')	'SMR NG + CCS (VPSA), 98 (average)' (megajoule, CH, None)	Water supply	2.27993e-05
('ILCD 2.0 2018 midpoint', 'climate change', 'climate change total')	'SMR NG + CCS (VPSA), 98 (average)' (megajoule, CH, None)	Electricity from/to grid	0.0024055
('ILCD 2.0 2018 midpoint', 'climate change', 'climate change total')	'SMR NG + CCS (VPSA), 98 (average)' (megajoule, CH, None)	Catalysts&adsorbents	9.12173e-05
('ILCD 2.0 2018 midpoint', 'climate change', 'climate change total')	'SMR NG + CCS (VPSA), 98 (average)' (megajoule, CH, None)	CO2 transport and storage	0.000181392
('ILCD 2.0 2018 midpoint', 'climate change', 'climate change total')	'SMR NG + CCS (VPSA), 98 (average)' (megajoule, CH, None)	Direct CO2 emissions	0.0289473
('ILCD 2.0 2018 midpoint', 'climate change', 'climate change total')	'SMR NG + CCS (VPSA), 98 (average)' (megajoule, CH, None)	Emissions from fuel burning in furnace	1.92451e-05
('ILCD 2.0 2018 midpoint', 'climate change', 'climate change total')	'SMR BM, HT+LT, + CCS (VPSA), 98 (average), digestate incineration' (megajoule, CH, None)	Fuel supply chain	-0.0686232
('ILCD 2.0 2018 midpoint', 'climate change', 'climate change total')	'SMR BM, HT+LT, + CCS (VPSA), 98 (average), digestate incineration' (megajoule, CH, None)	Plant infrastructure	0.000631292
('ILCD 2.0 2018 midpoint', 'climate change', 'climate change total')	'SMR BM, HT+LT, + CCS (VPSA), 98 (average), digestate incineration' (megajoule, CH, None)	Water supply	2.27998e-05
('ILCD 2.0 2018 midpoint', 'climate change', 'climate change total')	'SMR BM, HT+LT, + CCS (VPSA), 98 (average), digestate incineration' (megajoule, CH, None)	Electricity from/to grid	0.0026698
('ILCD 2.0 2018 midpoint', 'climate change', 'climate change total')	'SMR BM, HT+LT, + CCS (VPSA), 98 (average), digestate incineration' (megajoule, CH, None)	Catalysts&adsorbents	9.12173e-05
('ILCD 2.0 2018 midpoint', 'climate change', 'climate change total')	'SMR BM, HT+LT, + CCS (VPSA), 98 (average), digestate incineration' (megajoule, CH, None)	CO2 transport and storage	0.000210588
('ILCD 2.0 2018 midpoint', 'climate change', 'climate change total')	'SMR BM, HT+LT, + CCS (VPSA), 98 (average), digestate incineration' (megajoule, CH, None)	Direct CO2 emissions	0.0217244
('ILCD 2.0 2018 midpoint', 'climate change', 'climate change total')	'SMR BM, HT+LT, + CCS (VPSA), 98 (average), digestate incineration' (megajoule, CH, None)	Emissions from fuel burning in furnace	2.86676e-05
('ILCD 2.0 2018 midpoint', 'climate change', 'climate change total')	'SMR NG, HT+LT, + CCS (MDEA), 98 (average)' (megajoule, CH, None)	Fuel supply chain	0.0128484
('ILCD 2.0 2018 midpoint', 'climate change', 'climate change total')	'SMR NG, HT+LT, + CCS (MDEA), 98 (average)' (megajoule, CH, None)	Plant infrastructure	0.000631202
('ILCD 2.0 2018 midpoint', 'climate change', 'climate change total')	'SMR NG, HT+LT, + CCS (MDEA), 98 (average)' (megajoule, CH, None)	Water supply	2.27963e-05
('ILCD 2.0 2018 midpoint', 'climate change', 'climate change total')	'SMR NG, HT+LT, + CCS (MDEA), 98 (average)' (megajoule, CH, None)	Electricity from/to grid	0.00231544
('ILCD 2.0 2018 midpoint', 'climate change', 'climate change total')	'SMR NG, HT+LT, + CCS (MDEA), 98 (average)' (megajoule, CH, None)	Catalysts&adsorbents	9.63591e-05
('ILCD 2.0 2018 midpoint', 'climate change', 'climate change total')	'SMR NG, HT+LT, + CCS (MDEA), 98 (average)' (megajoule, CH, None)	CO2 transport and storage	0.000212166
('ILCD 2.0 2018 midpoint', 'climate change', 'climate change total')	'SMR NG, HT+LT, + CCS (MDEA), 98 (average)' (megajoule, CH, None)	Direct CO2 emissions	0.0217538
('ILCD 2.0 2018 midpoint', 'climate change', 'climate change total')	'SMR NG, HT+LT, + CCS (MDEA), 98 (average)' (megajoule, CH, None)	Emissions from fuel burning in furnace	2.49028e-05
('ILCD 2.0 2018 midpoint', 'climate change', 'climate change total')	'SMR NG + CCS (MDEA), 90 (lower bound)' (megajoule, CH, None)	Fuel supply chain	0.0129439
('ILCD 2.0 2018 midpoint', 'climate change', 'climate change total')	'SMR NG + CCS (MDEA), 90 (lower bound)' (megajoule, CH, None)	Plant infrastructure	0.000631278
('ILCD 2.0 2018 midpoint', 'climate change', 'climate change total')	'SMR NG + CCS (MDEA), 90 (lower bound)' (megajoule, CH, None)	Water supply	2.27992e-05
('ILCD 2.0 2018 midpoint', 'climate change', 'climate change total')	'SMR NG + CCS (MDEA), 90 (lower bound)' (megajoule, CH, None)	Electricity from/to grid	0.000854139
('ILCD 2.0 2018 midpoint', 'climate change', 'climate change total')	'SMR NG + CCS (MDEA), 90 (lower bound)' (megajoule, CH, None)	Catalysts&adsorbents	9.52375e-05
('ILCD 2.0 2018 midpoint', 'climate change', 'climate change total')	'SMR NG + CCS (MDEA), 90 (lower bound)' (megajoule, CH, None)	CO2 transport and storage	0.000165885
('ILCD 2.0 2018 midpoint', 'climate change', 'climate change total')	'SMR NG + CCS (MDEA), 90 (lower bound)' (megajoule, CH, None)	Direct CO2 emissions	0.0335096
('ILCD 2.0 2018 midpoint', 'climate change', 'climate change total')	'SMR NG + CCS (MDEA), 90 (lower bound)' (megajoule, CH, None)	Emissions from fuel burning in furnace	1.80837e-05
('ILCD 2.0 2018 midpoint', 'climate change', 'climate change total')	'SMR NG/BM, HT+LT, 60:40 + CCS (MDEA), 98 (average), digestate incineration' (megajoule, CH, None)	Fuel supply chain	-0.0189087
('ILCD 2.0 2018 midpoint', 'climate change', 'climate change total')	'SMR NG/BM, HT+LT, 60:40 + CCS (MDEA), 98 (average), digestate incineration' (megajoule, CH, None)	Plant infrastructure	0.000631202
('ILCD 2.0 2018 midpoint', 'climate change', 'climate change total')	'SMR NG/BM, HT+LT, 60:40 + CCS (MDEA), 98 (average), digestate incineration' (megajoule, CH, None)	Water supply	2.27963e-05
('ILCD 2.0 2018 midpoint', 'climate change', 'climate change total')	'SMR NG/BM, HT+LT, 60:40 + CCS (MDEA), 98 (average), digestate incineration' (megajoule, CH, None)	Electricity from/to grid	0.00231544
('ILCD 2.0 2018 midpoint', 'climate change', 'climate change total')	'SMR NG/BM, HT+LT, 60:40 + CCS (MDEA), 98 (average), digestate incineration' (megajoule, CH, None)	Catalysts&adsorbents	9.63591e-05
('ILCD 2.0 2018 midpoint', 'climate change', 'climate change total')	'SMR NG/BM, HT+LT, 60:40 + CCS (MDEA), 98 (average), digestate incineration' (megajoule, CH, None)	CO2 transport and storage	0.000212166
('ILCD 2.0 2018 midpoint', 'climate change', 'climate change total')	'SMR NG/BM, HT+LT, 60:40 + CCS (MDEA), 98 (average), digestate incineration' (megajoule, CH, None)	Direct CO2 emissions	0.0217538
('ILCD 2.0 2018 midpoint', 'climate change', 'climate change total')	'SMR NG/BM, HT+LT, 60:40 + CCS (MDEA), 98 (average), digestate incineration' (megajoule, CH, None)	Emissions from fuel burning in furnace	2.49028e-05
('ILCD 2.0 2018 midpoint', 'climate change', 'climate change total')	'SMR BM + CCS (MDEA), 90 (average)' (megajoule, CH, None)	Fuel supply chain	-0.104288
('ILCD 2.0 2018 midpoint', 'climate change', 'climate change total')	'SMR BM + CCS (MDEA), 90 (average)' (megajoule, CH, None)	Plant infrastructure	0.00063124
('ILCD 2.0 2018 midpoint', 'climate change', 'climate change total')	'SMR BM + CCS (MDEA), 90 (average)' (megajoule, CH, None)	Water supply	2.27978e-05
('ILCD 2.0 2018 midpoint', 'climate change', 'climate change total')	'SMR BM + CCS (MDEA), 90 (average)' (megajoule, CH, None)	Electricity from/to grid	0.00084281
('ILCD 2.0 2018 midpoint', 'climate change', 'climate change total')	'SMR BM + CCS (MDEA), 90 (average)' (megajoule, CH, None)	Catalysts&adsorbents	9.52455e-05
('ILCD 2.0 2018 midpoint', 'climate change', 'climate change total')	'SMR BM + CCS (MDEA), 90 (average)' (megajoule, CH, None)	CO2 transport and storage	0.000166214
('ILCD 2.0 2018 midpoint', 'climate change', 'climate change total')	'SMR BM + CCS (MDEA), 90 (average)' (megajoule, CH, None)	Direct CO2 emissions	0.0331381
('ILCD 2.0 2018 midpoint', 'climate change', 'climate change total')	'SMR BM + CCS (MDEA), 90 (average)' (megajoule, CH, None)	Emissions from fuel burning in furnace	1.89171e-05
('ILCD 2.0 2018 midpoint', 'climate change', 'climate change total')	'SMR NG, HT+LT, + CCS (MDEA), 98 (average), 25 bar' (megajoule, CH, None)	Fuel supply chain	0.0128484
('ILCD 2.0 2018 midpoint', 'climate change', 'climate change total')	'SMR NG, HT+LT, + CCS (MDEA), 98 (average), 25 bar' (megajoule, CH, None)	Plant infrastructure	0.000631202
('ILCD 2.0 2018 midpoint', 'climate change', 'climate change total')	'SMR NG, HT+LT, + CCS (MDEA), 98 (average), 25 bar' (megajoule, CH, None)	Water supply	2.27963e-05
('ILCD 2.0 2018 midpoint', 'climate change', 'climate change total')	'SMR NG, HT+LT, + CCS (MDEA), 98 (average), 25 bar' (megajoule, CH, None)	Electricity from/to grid	-0.00189853
('ILCD 2.0 2018 midpoint', 'climate change', 'climate change total')	'SMR NG, HT+LT, + CCS (MDEA), 98 (average), 25 bar' (megajoule, CH, None)	Catalysts&adsorbents	9.63591e-05
('ILCD 2.0 2018 midpoint', 'climate change', 'climate change total')	'SMR NG, HT+LT, + CCS (MDEA), 98 (average), 25 bar' (megajoule, CH, None)	CO2 transport and storage	0.000212166
('ILCD 2.0 2018 midpoint', 'climate change', 'climate change total')	'SMR NG, HT+LT, + CCS (MDEA), 98 (average), 25 bar' (megajoule, CH, None)	Direct CO2 emissions	0.0217538
('ILCD 2.0 2018 midpoint', 'climate change', 'climate change total')	'SMR NG, HT+LT, + CCS (MDEA), 98 (average), 25 bar' (megajoule, CH, None)	Emissions from fuel burning in furnace	2.49028e-05
('ILCD 2.0 2018 midpoint', 'climate change', 'climate change total')	'SMR BM, HT+LT, + CCS (MDEA), 98 (average), upper bound C sequestration' (megajoule, CH, None)	Fuel supply chain	-0.148158
('ILCD 2.0 2018 midpoint', 'climate change', 'climate change total')	'SMR BM, HT+LT, + CCS (MDEA), 98 (average), upper bound C sequestration' (megajoule, CH, None)	Plant infrastructure	0.000631272
('ILCD 2.0 2018 midpoint', 'climate change', 'climate change total')	'SMR BM, HT+LT, + CCS (MDEA), 98 (average), upper bound C sequestration' (megajoule, CH, None)	Water supply	2.2799e-05
('ILCD 2.0 2018 midpoint', 'climate change', 'climate change total')	'SMR BM, HT+LT, + CCS (MDEA), 98 (average), upper bound C sequestration' (megajoule, CH, None)	Electricity from/to grid	0.00222381
('ILCD 2.0 2018 midpoint', 'climate change', 'climate change total')	'SMR BM, HT+LT, + CCS (MDEA), 98 (average), upper bound C sequestration' (megajoule, CH, None)	Catalysts&adsorbents	9.63495e-05
('ILCD 2.0 2018 midpoint', 'climate change', 'climate change total')	'SMR BM, HT+LT, + CCS (MDEA), 98 (average), upper bound C sequestration' (megajoule, CH, None)	CO2 transport and storage	0.000211771
('ILCD 2.0 2018 midpoint', 'climate change', 'climate change total')	'SMR BM, HT+LT, + CCS (MDEA), 98 (average), upper bound C sequestration' (megajoule, CH, None)	Direct CO2 emissions	0.0215704
('ILCD 2.0 2018 midpoint', 'climate change', 'climate change total')	'SMR BM, HT+LT, + CCS (MDEA), 98 (average), upper bound C sequestration' (megajoule, CH, None)	Emissions from fuel burning in furnace	2.53969e-05
('ILCD 2.0 2018 midpoint', 'climate change', 'climate change total')	'SMR BM, HT+LT, upper bound C sequestration' (megajoule, CH, None)	Fuel supply chain	-0.151162
('ILCD 2.0 2018 midpoint', 'climate change', 'climate change total')	'SMR BM, HT+LT, upper bound C sequestration' (megajoule, CH, None)	Plant infrastructure	0.00063127
('ILCD 2.0 2018 midpoint', 'climate change', 'climate change total')	'SMR BM, HT+LT, upper bound C sequestration' (megajoule, CH, None)	Water supply	2.2799e-05
('ILCD 2.0 2018 midpoint', 'climate change', 'climate change total')	'SMR BM, HT+LT, upper bound C sequestration' (megajoule, CH, None)	Electricity from/to grid	-0.000189262
('ILCD 2.0 2018 midpoint', 'climate change', 'climate change total')	'SMR BM, HT+LT, upper bound C sequestration' (megajoule, CH, None)	Catalysts&adsorbents	9.12173e-05
('ILCD 2.0 2018 midpoint', 'climate change', 'climate change total')	'SMR BM, HT+LT, upper bound C sequestration' (megajoule, CH, None)	Direct CO2 emissions	0.0742943
('ILCD 2.0 2018 midpoint', 'climate change', 'climate change total')	'SMR BM, HT+LT, upper bound C sequestration' (megajoule, CH, None)	Emissions from fuel burning in furnace	2.81718e-05
('ILCD 2.0 2018 midpoint', 'climate change', 'climate change total')	'SMR BM, HT+LT, + CCS (MDEA), 98 (average)' (megajoule, CH, None)	Fuel supply chain	-0.103519
('ILCD 2.0 2018 midpoint', 'climate change', 'climate change total')	'SMR BM, HT+LT, + CCS (MDEA), 98 (average)' (megajoule, CH, None)	Plant infrastructure	0.000631272
('ILCD 2.0 2018 midpoint', 'climate change', 'climate change total')	'SMR BM, HT+LT, + CCS (MDEA), 98 (average)' (megajoule, CH, None)	Water supply	2.2799e-05
('ILCD 2.0 2018 midpoint', 'climate change', 'climate change total')	'SMR BM, HT+LT, + CCS (MDEA), 98 (average)' (megajoule, CH, None)	Electricity from/to grid	0.00222381
('ILCD 2.0 2018 midpoint', 'climate change', 'climate change total')	'SMR BM, HT+LT, + CCS (MDEA), 98 (average)' (megajoule, CH, None)	Catalysts&adsorbents	9.63495e-05
('ILCD 2.0 2018 midpoint', 'climate change', 'climate change total')	'SMR BM, HT+LT, + CCS (MDEA), 98 (average)' (megajoule, CH, None)	CO2 transport and storage	0.000211771
('ILCD 2.0 2018 midpoint', 'climate change', 'climate change total')	'SMR BM, HT+LT, + CCS (MDEA), 98 (average)' (megajoule, CH, None)	Direct CO2 emissions	0.0215704
('ILCD 2.0 2018 midpoint', 'climate change', 'climate change total')	'SMR BM, HT+LT, + CCS (MDEA), 98 (average)' (megajoule, CH, None)	Emissions from fuel burning in furnace	2.53969e-05
('ILCD 2.0 2018 midpoint', 'climate change', 'climate change total')	'SMR BM + CCS (VPSA), 98 (average)' (megajoule, CH, None)	Fuel supply chain	-0.104901
('ILCD 2.0 2018 midpoint', 'climate change', 'climate change total')	'SMR BM + CCS (VPSA), 98 (average)' (megajoule, CH, None)	Plant infrastructure	0.000631257
('ILCD 2.0 2018 midpoint', 'climate change', 'climate change total')	'SMR BM + CCS (VPSA), 98 (average)' (megajoule, CH, None)	Water supply	2.27984e-05
('ILCD 2.0 2018 midpoint', 'climate change', 'climate change total')	'SMR BM + CCS (VPSA), 98 (average)' (megajoule, CH, None)	Electricity from/to grid	0.00220062
('ILCD 2.0 2018 midpoint', 'climate change', 'climate change total')	'SMR BM + CCS (VPSA), 98 (average)' (megajoule, CH, None)	Catalysts&adsorbents	9.12173e-05
('ILCD 2.0 2018 midpoint', 'climate change', 'climate change total')	'SMR BM + CCS (VPSA), 98 (average)' (megajoule, CH, None)	CO2 transport and storage	0.000182513
('ILCD 2.0 2018 midpoint', 'climate change', 'climate change total')	'SMR BM + CCS (VPSA), 98 (average)' (megajoule, CH, None)	Direct CO2 emissions	0.0286153
('ILCD 2.0 2018 midpoint', 'climate change', 'climate change total')	'SMR BM + CCS (VPSA), 98 (average)' (megajoule, CH, None)	Emissions from fuel burning in furnace	2.08989e-05
('ILCD 2.0 2018 midpoint', 'climate change', 'climate change total')	'SMR BM, HT+LT, with digestate incineration, 26 bar' (megajoule, CH, None)	Fuel supply chain	-0.0695878
('ILCD 2.0 2018 midpoint', 'climate change', 'climate change total')	'SMR BM, HT+LT, with digestate incineration, 26 bar' (megajoule, CH, None)	Plant infrastructure	0.00063127
('ILCD 2.0 2018 midpoint', 'climate change', 'climate change total')	'SMR BM, HT+LT, with digestate incineration, 26 bar' (megajoule, CH, None)	Water supply	2.2799e-05
('ILCD 2.0 2018 midpoint', 'climate change', 'climate change total')	'SMR BM, HT+LT, with digestate incineration, 26 bar' (megajoule, CH, None)	Electricity from/to grid	-0.00440363
('ILCD 2.0 2018 midpoint', 'climate change', 'climate change total')	'SMR BM, HT+LT, with digestate incineration, 26 bar' (megajoule, CH, None)	Catalysts&adsorbents	9.12173e-05
('ILCD 2.0 2018 midpoint', 'climate change', 'climate change total')	'SMR BM, HT+LT, with digestate incineration, 26 bar' (megajoule, CH, None)	Direct CO2 emissions	0.0742943
('ILCD 2.0 2018 midpoint', 'climate change', 'climate change total')	'SMR BM, HT+LT, with digestate incineration, 26 bar' (megajoule, CH, None)	Emissions from fuel burning in furnace	2.81718e-05
('ILCD 2.0 2018 midpoint', 'climate change', 'climate change total')	'SMR BM, HT+LT, + CCS (VPSA), 98 (upper bound)' (megajoule, CH, None)	Fuel supply chain	-0.104315
('ILCD 2.0 2018 midpoint', 'climate change', 'climate change total')	'SMR BM, HT+LT, + CCS (VPSA), 98 (upper bound)' (megajoule, CH, None)	Plant infrastructure	0.000631283
('ILCD 2.0 2018 midpoint', 'climate change', 'climate change total')	'SMR BM, HT+LT, + CCS (VPSA), 98 (upper bound)' (megajoule, CH, None)	Water supply	2.27994e-05
('ILCD 2.0 2018 midpoint', 'climate change', 'climate change total')	'SMR BM, HT+LT, + CCS (VPSA), 98 (upper bound)' (megajoule, CH, None)	Electricity from/to grid	0.00283245
('ILCD 2.0 2018 midpoint', 'climate change', 'climate change total')	'SMR BM, HT+LT, + CCS (VPSA), 98 (upper bound)' (megajoule, CH, None)	Catalysts&adsorbents	9.12173e-05
('ILCD 2.0 2018 midpoint', 'climate change', 'climate change total')	'SMR BM, HT+LT, + CCS (VPSA), 98 (upper bound)' (megajoule, CH, None)	CO2 transport and storage	0.000211157
('ILCD 2.0 2018 midpoint', 'climate change', 'climate change total')	'SMR BM, HT+LT, + CCS (VPSA), 98 (upper bound)' (megajoule, CH, None)	Direct CO2 emissions	0.0216924
('ILCD 2.0 2018 midpoint', 'climate change', 'climate change total')	'SMR BM, HT+LT, + CCS (VPSA), 98 (upper bound)' (megajoule, CH, None)	Emissions from fuel burning in furnace	2.72861e-05
('ILCD 2.0 2018 midpoint', 'climate change', 'climate change total')	'SMR NG + CCS (MDEA), 98 (average)' (megajoule, CH, None)	Fuel supply chain	0.0129097
('ILCD 2.0 2018 midpoint', 'climate change', 'climate change total')	'SMR NG + CCS (MDEA), 98 (average)' (megajoule, CH, None)	Plant infrastructure	0.00063127
('ILCD 2.0 2018 midpoint', 'climate change', 'climate change total')	'SMR NG + CCS (MDEA), 98 (average)' (megajoule, CH, None)	Water supply	2.2799e-05
('ILCD 2.0 2018 midpoint', 'climate change', 'climate change total')	'SMR NG + CCS (MDEA), 98 (average)' (megajoule, CH, None)	Electricity from/to grid	0.00121931
('ILCD 2.0 2018 midpoint', 'climate change', 'climate change total')	'SMR NG + CCS (MDEA), 98 (average)' (megajoule, CH, None)	Catalysts&adsorbents	9.55914e-05
('ILCD 2.0 2018 midpoint', 'climate change', 'climate change total')	'SMR NG + CCS (MDEA), 98 (average)' (megajoule, CH, None)	CO2 transport and storage	0.000180488
('ILCD 2.0 2018 midpoint', 'climate change', 'climate change total')	'SMR NG + CCS (MDEA), 98 (average)' (megajoule, CH, None)	Direct CO2 emissions	0.0297827
('ILCD 2.0 2018 midpoint', 'climate change', 'climate change total')	'SMR NG + CCS (MDEA), 98 (average)' (megajoule, CH, None)	Emissions from fuel burning in furnace	1.77218e-05
('ILCD 2.0 2018 midpoint', 'climate change', 'climate change total')	'SMR NG, HT+LT, + CCS (VPSA), 98 (lower bound)' (megajoule, CH, None)	Fuel supply chain	0.012918
('ILCD 2.0 2018 midpoint', 'climate change', 'climate change total')	'SMR NG, HT+LT, + CCS (VPSA), 98 (lower bound)' (megajoule, CH, None)	Plant infrastructure	0.000631284
('ILCD 2.0 2018 midpoint', 'climate change', 'climate change total')	'SMR NG, HT+LT, + CCS (VPSA), 98 (lower bound)' (megajoule, CH, None)	Water supply	2.27995e-05
('ILCD 2.0 2018 midpoint', 'climate change', 'climate change total')	'SMR NG, HT+LT, + CCS (VPSA), 98 (lower bound)' (megajoule, CH, None)	Electricity from/to grid	0.00260517
('ILCD 2.0 2018 midpoint', 'climate change', 'climate change total')	'SMR NG, HT+LT, + CCS (VPSA), 98 (lower bound)' (megajoule, CH, None)	Catalysts&adsorbents	9.12173e-05
('ILCD 2.0 2018 midpoint', 'climate change', 'climate change total')	'SMR NG, HT+LT, + CCS (VPSA), 98 (lower bound)' (megajoule, CH, None)	CO2 transport and storage	0.0002106
('ILCD 2.0 2018 midpoint', 'climate change', 'climate change total')	'SMR NG, HT+LT, + CCS (VPSA), 98 (lower bound)' (megajoule, CH, None)	Direct CO2 emissions	0.0218382
('ILCD 2.0 2018 midpoint', 'climate change', 'climate change total')	'SMR NG, HT+LT, + CCS (VPSA), 98 (lower bound)' (megajoule, CH, None)	Emissions from fuel burning in furnace	2.97852e-05
('ILCD 2.0 2018 midpoint', 'climate change', 'climate change total')	'SMR NG, HT+LT, + CCS (MDEA), 90 (upper bound)' (megajoule, CH, None)	Fuel supply chain	0.0128601
('ILCD 2.0 2018 midpoint', 'climate change', 'climate change total')	'SMR NG, HT+LT, + CCS (MDEA), 90 (upper bound)' (megajoule, CH, None)	Plant infrastructure	0.000631202
('ILCD 2.0 2018 midpoint', 'climate change', 'climate change total')	'SMR NG, HT+LT, + CCS (MDEA), 90 (upper bound)' (megajoule, CH, None)	Water supply	2.27963e-05
('ILCD 2.0 2018 midpoint', 'climate change', 'climate change total')	'SMR NG, HT+LT, + CCS (MDEA), 90 (upper bound)' (megajoule, CH, None)	Electricity from/to grid	0.00168462
('ILCD 2.0 2018 midpoint', 'climate change', 'climate change total')	'SMR NG, HT+LT, + CCS (MDEA), 90 (upper bound)' (megajoule, CH, None)	Catalysts&adsorbents	9.5945e-05
('ILCD 2.0 2018 midpoint', 'climate change', 'climate change total')	'SMR NG, HT+LT, + CCS (MDEA), 90 (upper bound)' (megajoule, CH, None)	CO2 transport and storage	0.000195079
('ILCD 2.0 2018 midpoint', 'climate change', 'climate change total')	'SMR NG, HT+LT, + CCS (MDEA), 90 (upper bound)' (megajoule, CH, None)	Direct CO2 emissions	0.025994
('ILCD 2.0 2018 midpoint', 'climate change', 'climate change total')	'SMR NG, HT+LT, + CCS (MDEA), 90 (upper bound)' (megajoule, CH, None)	Emissions from fuel burning in furnace	2.50276e-05
('ILCD 2.0 2018 midpoint', 'climate change', 'climate change total')	'SMR BM, HT+LT, + CCS (MDEA), 98 (average), cut-off approach' (megajoule, CH, None)	Fuel supply chain	0.0823313
('ILCD 2.0 2018 midpoint', 'climate change', 'climate change total')	'SMR BM, HT+LT, + CCS (MDEA), 98 (average), cut-off approach' (megajoule, CH, None)	Plant infrastructure	0.000631272
('ILCD 2.0 2018 midpoint', 'climate change', 'climate change total')	'SMR BM, HT+LT, + CCS (MDEA), 98 (average), cut-off approach' (megajoule, CH, None)	Water supply	2.2799e-05
('ILCD 2.0 2018 midpoint', 'climate change', 'climate change total')	'SMR BM, HT+LT, + CCS (MDEA), 98 (average), cut-off approach' (megajoule, CH, None)	Electricity from/to grid	0.00222381
('ILCD 2.0 2018 midpoint', 'climate change', 'climate change total')	'SMR BM, HT+LT, + CCS (MDEA), 98 (average), cut-off approach' (megajoule, CH, None)	Catalysts&adsorbents	9.63495e-05
('ILCD 2.0 2018 midpoint', 'climate change', 'climate change total')	'SMR BM, HT+LT, + CCS (MDEA), 98 (average), cut-off approach' (megajoule, CH, None)	CO2 transport and storage	0.000211771
('ILCD 2.0 2018 midpoint', 'climate change', 'climate change total')	'SMR BM, HT+LT, + CCS (MDEA), 98 (average), cut-off approach' (megajoule, CH, None)	Direct CO2 emissions	0.0215704
('ILCD 2.0 2018 midpoint', 'climate change', 'climate change total')	'SMR BM, HT+LT, + CCS (MDEA), 98 (average), cut-off approach' (megajoule, CH, None)	Emissions from fuel burning in furnace	2.53969e-05
('ILCD 2.0 2018 midpoint', 'climate change', 'climate change total')	'SMR NG/BM, HT+LT, 50:50 + CCS (MDEA), 98 (average), digestate incineration' (megajoule, CH, None)	Fuel supply chain	-0.026848
('ILCD 2.0 2018 midpoint', 'climate change', 'climate change total')	'SMR NG/BM, HT+LT, 50:50 + CCS (MDEA), 98 (average), digestate incineration' (megajoule, CH, None)	Plant infrastructure	0.000631202
('ILCD 2.0 2018 midpoint', 'climate change', 'climate change total')	'SMR NG/BM, HT+LT, 50:50 + CCS (MDEA), 98 (average), digestate incineration' (megajoule, CH, None)	Water supply	2.27963e-05
('ILCD 2.0 2018 midpoint', 'climate change', 'climate change total')	'SMR NG/BM, HT+LT, 50:50 + CCS (MDEA), 98 (average), digestate incineration' (megajoule, CH, None)	Electricity from/to grid	0.00231544
('ILCD 2.0 2018 midpoint', 'climate change', 'climate change total')	'SMR NG/BM, HT+LT, 50:50 + CCS (MDEA), 98 (average), digestate incineration' (megajoule, CH, None)	Catalysts&adsorbents	9.63591e-05
('ILCD 2.0 2018 midpoint', 'climate change', 'climate change total')	'SMR NG/BM, HT+LT, 50:50 + CCS (MDEA), 98 (average), digestate incineration' (megajoule, CH, None)	CO2 transport and storage	0.000212166
('ILCD 2.0 2018 midpoint', 'climate change', 'climate change total')	'SMR NG/BM, HT+LT, 50:50 + CCS (MDEA), 98 (average), digestate incineration' (megajoule, CH, None)	Direct CO2 emissions	0.0217538
('ILCD 2.0 2018 midpoint', 'climate change', 'climate change total')	'SMR NG/BM, HT+LT, 50:50 + CCS (MDEA), 98 (average), digestate incineration' (megajoule, CH, None)	Emissions from fuel burning in furnace	2.49028e-05
('ILCD 2.0 2018 midpoint', 'climate change', 'climate change total')	'SMR BM + CCS (MDEA), 98 (lower bound)' (megajoule, CH, None)	Fuel supply chain	-0.103877
('ILCD 2.0 2018 midpoint', 'climate change', 'climate change total')	'SMR BM + CCS (MDEA), 98 (lower bound)' (megajoule, CH, None)	Plant infrastructure	0.000631271
('ILCD 2.0 2018 midpoint', 'climate change', 'climate change total')	'SMR BM + CCS (MDEA), 98 (lower bound)' (megajoule, CH, None)	Water supply	2.2799e-05
('ILCD 2.0 2018 midpoint', 'climate change', 'climate change total')	'SMR BM + CCS (MDEA), 98 (lower bound)' (megajoule, CH, None)	Electricity from/to grid	0.00128791
('ILCD 2.0 2018 midpoint', 'climate change', 'climate change total')	'SMR BM + CCS (MDEA), 98 (lower bound)' (megajoule, CH, None)	Catalysts&adsorbents	9.56024e-05
('ILCD 2.0 2018 midpoint', 'climate change', 'climate change total')	'SMR BM + CCS (MDEA), 98 (lower bound)' (megajoule, CH, None)	CO2 transport and storage	0.00018094
('ILCD 2.0 2018 midpoint', 'climate change', 'climate change total')	'SMR BM + CCS (MDEA), 98 (lower bound)' (megajoule, CH, None)	Direct CO2 emissions	0.0293394
('ILCD 2.0 2018 midpoint', 'climate change', 'climate change total')	'SMR BM + CCS (MDEA), 98 (lower bound)' (megajoule, CH, None)	Emissions from fuel burning in furnace	1.83675e-05
('ILCD 2.0 2018 midpoint', 'climate change', 'climate change total')	'SMR NG/BM, HT+LT, 25:75 + CCS (MDEA), 98 (average)' (megajoule, CH, None)	Fuel supply chain	-0.0725366
('ILCD 2.0 2018 midpoint', 'climate change', 'climate change total')	'SMR NG/BM, HT+LT, 25:75 + CCS (MDEA), 98 (average)' (megajoule, CH, None)	Plant infrastructure	0.000631202
('ILCD 2.0 2018 midpoint', 'climate change', 'climate change total')	'SMR NG/BM, HT+LT, 25:75 + CCS (MDEA), 98 (average)' (megajoule, CH, None)	Water supply	2.27963e-05
('ILCD 2.0 2018 midpoint', 'climate change', 'climate change total')	'SMR NG/BM, HT+LT, 25:75 + CCS (MDEA), 98 (average)' (megajoule, CH, None)	Electricity from/to grid	0.00231544
('ILCD 2.0 2018 midpoint', 'climate change', 'climate change total')	'SMR NG/BM, HT+LT, 25:75 + CCS (MDEA), 98 (average)' (megajoule, CH, None)	Catalysts&adsorbents	9.63591e-05
('ILCD 2.0 2018 midpoint', 'climate change', 'climate change total')	'SMR NG/BM, HT+LT, 25:75 + CCS (MDEA), 98 (average)' (megajoule, CH, None)	CO2 transport and storage	0.000212166
('ILCD 2.0 2018 midpoint', 'climate change', 'climate change total')	'SMR NG/BM, HT+LT, 25:75 + CCS (MDEA), 98 (average)' (megajoule, CH, None)	Direct CO2 emissions	0.0217538
('ILCD 2.0 2018 midpoint', 'climate change', 'climate change total')	'SMR NG/BM, HT+LT, 25:75 + CCS (MDEA), 98 (average)' (megajoule, CH, None)	Emissions from fuel burning in furnace	2.49028e-05
('ILCD 2.0 2018 midpoint', 'climate change', 'climate change total')	'SMR NG/BM, HT+LT, 70:30 + CCS (MDEA), 98 (average), digestate incineration' (megajoule, CH, None)	Fuel supply chain	-0.0109694
('ILCD 2.0 2018 midpoint', 'climate change', 'climate change total')	'SMR NG/BM, HT+LT, 70:30 + CCS (MDEA), 98 (average), digestate incineration' (megajoule, CH, None)	Plant infrastructure	0.000631202
('ILCD 2.0 2018 midpoint', 'climate change', 'climate change total')	'SMR NG/BM, HT+LT, 70:30 + CCS (MDEA), 98 (average), digestate incineration' (megajoule, CH, None)	Water supply	2.27963e-05
('ILCD 2.0 2018 midpoint', 'climate change', 'climate change total')	'SMR NG/BM, HT+LT, 70:30 + CCS (MDEA), 98 (average), digestate incineration' (megajoule, CH, None)	Electricity from/to grid	0.00231544
('ILCD 2.0 2018 midpoint', 'climate change', 'climate change total')	'SMR NG/BM, HT+LT, 70:30 + CCS (MDEA), 98 (average), digestate incineration' (megajoule, CH, None)	Catalysts&adsorbents	9.63591e-05
('ILCD 2.0 2018 midpoint', 'climate change', 'climate change total')	'SMR NG/BM, HT+LT, 70:30 + CCS (MDEA), 98 (average), digestate incineration' (megajoule, CH, None)	CO2 transport and storage	0.000212166
('ILCD 2.0 2018 midpoint', 'climate change', 'climate change total')	'SMR NG/BM, HT+LT, 70:30 + CCS (MDEA), 98 (average), digestate incineration' (megajoule, CH, None)	Direct CO2 emissions	0.0217538
('ILCD 2.0 2018 midpoint', 'climate change', 'climate change total')	'SMR NG/BM, HT+LT, 70:30 + CCS (MDEA), 98 (average), digestate incineration' (megajoule, CH, None)	Emissions from fuel burning in furnace	2.49028e-05
('ILCD 2.0 2018 midpoint', 'climate change', 'climate change total')	'SMR NG + CCS (VPSA), 98 (lower bound)' (megajoule, CH, None)	Fuel supply chain	0.0129259
('ILCD 2.0 2018 midpoint', 'climate change', 'climate change total')	'SMR NG + CCS (VPSA), 98 (lower bound)' (megajoule, CH, None)	Plant infrastructure	0.000631284
('ILCD 2.0 2018 midpoint', 'climate change', 'climate change total')	'SMR NG + CCS (VPSA), 98 (lower bound)' (megajoule, CH, None)	Water supply	2.27995e-05
('ILCD 2.0 2018 midpoint', 'climate change', 'climate change total')	'SMR NG + CCS (VPSA), 98 (lower bound)' (megajoule, CH, None)	Electricity from/to grid	0.00223309
('ILCD 2.0 2018 midpoint', 'climate change', 'climate change total')	'SMR NG + CCS (VPSA), 98 (lower bound)' (megajoule, CH, None)	Catalysts&adsorbents	9.12173e-05
('ILCD 2.0 2018 midpoint', 'climate change', 'climate change total')	'SMR NG + CCS (VPSA), 98 (lower bound)' (megajoule, CH, None)	CO2 transport and storage	0.000180637
('ILCD 2.0 2018 midpoint', 'climate change', 'climate change total')	'SMR NG + CCS (VPSA), 98 (lower bound)' (megajoule, CH, None)	Direct CO2 emissions	0.0290399
('ILCD 2.0 2018 midpoint', 'climate change', 'climate change total')	'SMR NG + CCS (VPSA), 98 (lower bound)' (megajoule, CH, None)	Emissions from fuel burning in furnace	2.0232e-05
('ILCD 2.0 2018 midpoint', 'climate change', 'climate change total')	'SMR BM, HT+LT, with digestate incineration' (megajoule, CH, None)	Fuel supply chain	-0.0695878
('ILCD 2.0 2018 midpoint', 'climate change', 'climate change total')	'SMR BM, HT+LT, with digestate incineration' (megajoule, CH, None)	Plant infrastructure	0.00063127
('ILCD 2.0 2018 midpoint', 'climate change', 'climate change total')	'SMR BM, HT+LT, with digestate incineration' (megajoule, CH, None)	Water supply	2.2799e-05
('ILCD 2.0 2018 midpoint', 'climate change', 'climate change total')	'SMR BM, HT+LT, with digestate incineration' (megajoule, CH, None)	Electricity from/to grid	-0.000189262
('ILCD 2.0 2018 midpoint', 'climate change', 'climate change total')	'SMR BM, HT+LT, with digestate incineration' (megajoule, CH, None)	Catalysts&adsorbents	9.12173e-05
('ILCD 2.0 2018 midpoint', 'climate change', 'climate change total')	'SMR BM, HT+LT, with digestate incineration' (megajoule, CH, None)	Direct CO2 emissions	0.0742943
('ILCD 2.0 2018 midpoint', 'climate change', 'climate change total')	'SMR BM, HT+LT, with digestate incineration' (megajoule, CH, None)	Emissions from fuel burning in furnace	2.81718e-05
('ILCD 2.0 2018 midpoint', 'climate change', 'climate change total')	'SMR BM, HT+LT, + CCS (MDEA), 98 (lower bound)' (megajoule, CH, None)	Fuel supply chain	-0.103519
('ILCD 2.0 2018 midpoint', 'climate change', 'climate change total')	'SMR BM, HT+LT, + CCS (MDEA), 98 (lower bound)' (megajoule, CH, None)	Plant infrastructure	0.000631272
('ILCD 2.0 2018 midpoint', 'climate change', 'climate change total')	'SMR BM, HT+LT, + CCS (MDEA), 98 (lower bound)' (megajoule, CH, None)	Water supply	2.2799e-05
('ILCD 2.0 2018 midpoint', 'climate change', 'climate change total')	'SMR BM, HT+LT, + CCS (MDEA), 98 (lower bound)' (megajoule, CH, None)	Electricity from/to grid	0.00220823
('ILCD 2.0 2018 midpoint', 'climate change', 'climate change total')	'SMR BM, HT+LT, + CCS (MDEA), 98 (lower bound)' (megajoule, CH, None)	Catalysts&adsorbents	9.63495e-05
('ILCD 2.0 2018 midpoint', 'climate change', 'climate change total')	'SMR BM, HT+LT, + CCS (MDEA), 98 (lower bound)' (megajoule, CH, None)	CO2 transport and storage	0.000211771
('ILCD 2.0 2018 midpoint', 'climate change', 'climate change total')	'SMR BM, HT+LT, + CCS (MDEA), 98 (lower bound)' (megajoule, CH, None)	Direct CO2 emissions	0.0215704
('ILCD 2.0 2018 midpoint', 'climate change', 'climate change total')	'SMR BM, HT+LT, + CCS (MDEA), 98 (lower bound)' (megajoule, CH, None)	Emissions from fuel burning in furnace	2.53969e-05
('ILCD 2.0 2018 midpoint', 'climate change', 'climate change total')	'SMR NG/BM, HT+LT, 40:60 + CCS (MDEA), 98 (average), digestate incineration' (megajoule, CH, None)	Fuel supply chain	-0.0347873
('ILCD 2.0 2018 midpoint', 'climate change', 'climate change total')	'SMR NG/BM, HT+LT, 40:60 + CCS (MDEA), 98 (average), digestate incineration' (megajoule, CH, None)	Plant infrastructure	0.000631202
('ILCD 2.0 2018 midpoint', 'climate change', 'climate change total')	'SMR NG/BM, HT+LT, 40:60 + CCS (MDEA), 98 (average), digestate incineration' (megajoule, CH, None)	Water supply	2.27963e-05
('ILCD 2.0 2018 midpoint', 'climate change', 'climate change total')	'SMR NG/BM, HT+LT, 40:60 + CCS (MDEA), 98 (average), digestate incineration' (megajoule, CH, None)	Electricity from/to grid	0.00231544
('ILCD 2.0 2018 midpoint', 'climate change', 'climate change total')	'SMR NG/BM, HT+LT, 40:60 + CCS (MDEA), 98 (average), digestate incineration' (megajoule, CH, None)	Catalysts&adsorbents	9.63591e-05
('ILCD 2.0 2018 midpoint', 'climate change', 'climate change total')	'SMR NG/BM, HT+LT, 40:60 + CCS (MDEA), 98 (average), digestate incineration' (megajoule, CH, None)	CO2 transport and storage	0.000212166
('ILCD 2.0 2018 midpoint', 'climate change', 'climate change total')	'SMR NG/BM, HT+LT, 40:60 + CCS (MDEA), 98 (average), digestate incineration' (megajoule, CH, None)	Direct CO2 emissions	0.0217538
('ILCD 2.0 2018 midpoint', 'climate change', 'climate change total')	'SMR NG/BM, HT+LT, 40:60 + CCS (MDEA), 98 (average), digestate incineration' (megajoule, CH, None)	Emissions from fuel burning in furnace	2.49028e-05
('ILCD 2.0 2018 midpoint', 'climate change', 'climate change total')	'SMR BM, HT+LT, + CCS (MDEA), 98 (average), digestate incineration' (megajoule, CH, None)	Fuel supply chain	-0.0682049
('ILCD 2.0 2018 midpoint', 'climate change', 'climate change total')	'SMR BM, HT+LT, + CCS (MDEA), 98 (average), digestate incineration' (megajoule, CH, None)	Plant infrastructure	0.000631272
('ILCD 2.0 2018 midpoint', 'climate change', 'climate change total')	'SMR BM, HT+LT, + CCS (MDEA), 98 (average), digestate incineration' (megajoule, CH, None)	Water supply	2.2799e-05
('ILCD 2.0 2018 midpoint', 'climate change', 'climate change total')	'SMR BM, HT+LT, + CCS (MDEA), 98 (average), digestate incineration' (megajoule, CH, None)	Electricity from/to grid	0.00222381
('ILCD 2.0 2018 midpoint', 'climate change', 'climate change total')	'SMR BM, HT+LT, + CCS (MDEA), 98 (average), digestate incineration' (megajoule, CH, None)	Catalysts&adsorbents	9.63495e-05
('ILCD 2.0 2018 midpoint', 'climate change', 'climate change total')	'SMR BM, HT+LT, + CCS (MDEA), 98 (average), digestate incineration' (megajoule, CH, None)	CO2 transport and storage	0.000211771
('ILCD 2.0 2018 midpoint', 'climate change', 'climate change total')	'SMR BM, HT+LT, + CCS (MDEA), 98 (average), digestate incineration' (megajoule, CH, None)	Direct CO2 emissions	0.0215704
('ILCD 2.0 2018 midpoint', 'climate change', 'climate change total')	'SMR BM, HT+LT, + CCS (MDEA), 98 (average), digestate incineration' (megajoule, CH, None)	Emissions from fuel burning in furnace	2.53969e-05
('ILCD 2.0 2018 midpoint', 'climate change', 'climate change total')	'SMR NG/BM, HT+LT, 80:20 + CCS (MDEA), 98 (average)' (megajoule, CH, None)	Fuel supply chain	-0.00992093
('ILCD 2.0 2018 midpoint', 'climate change', 'climate change total')	'SMR NG/BM, HT+LT, 80:20 + CCS (MDEA), 98 (average)' (megajoule, CH, None)	Plant infrastructure	0.000631202
('ILCD 2.0 2018 midpoint', 'climate change', 'climate change total')	'SMR NG/BM, HT+LT, 80:20 + CCS (MDEA), 98 (average)' (megajoule, CH, None)	Water supply	2.27963e-05
('ILCD 2.0 2018 midpoint', 'climate change', 'climate change total')	'SMR NG/BM, HT+LT, 80:20 + CCS (MDEA), 98 (average)' (megajoule, CH, None)	Electricity from/to grid	0.00231544
('ILCD 2.0 2018 midpoint', 'climate change', 'climate change total')	'SMR NG/BM, HT+LT, 80:20 + CCS (MDEA), 98 (average)' (megajoule, CH, None)	Catalysts&adsorbents	9.63591e-05
('ILCD 2.0 2018 midpoint', 'climate change', 'climate change total')	'SMR NG/BM, HT+LT, 80:20 + CCS (MDEA), 98 (average)' (megajoule, CH, None)	CO2 transport and storage	0.000212166
('ILCD 2.0 2018 midpoint', 'climate change', 'climate change total')	'SMR NG/BM, HT+LT, 80:20 + CCS (MDEA), 98 (average)' (megajoule, CH, None)	Direct CO2 emissions	0.0217538
('ILCD 2.0 2018 midpoint', 'climate change', 'climate change total')	'SMR NG/BM, HT+LT, 80:20 + CCS (MDEA), 98 (average)' (megajoule, CH, None)	Emissions from fuel burning in furnace	2.49028e-05
('ILCD 2.0 2018 midpoint', 'climate change', 'climate change total')	'SMR NG + CCS (MDEA), 98 (average), 700 bar' (megajoule, CH, None)	Fuel supply chain	0.0129097
('ILCD 2.0 2018 midpoint', 'climate change', 'climate change total')	'SMR NG + CCS (MDEA), 98 (average), 700 bar' (megajoule, CH, None)	Plant infrastructure	0.00063127
('ILCD 2.0 2018 midpoint', 'climate change', 'climate change total')	'SMR NG + CCS (MDEA), 98 (average), 700 bar' (megajoule, CH, None)	Water supply	2.2799e-05
('ILCD 2.0 2018 midpoint', 'climate change', 'climate change total')	'SMR NG + CCS (MDEA), 98 (average), 700 bar' (megajoule, CH, None)	Electricity from/to grid	0.00995031
('ILCD 2.0 2018 midpoint', 'climate change', 'climate change total')	'SMR NG + CCS (MDEA), 98 (average), 700 bar' (megajoule, CH, None)	Catalysts&adsorbents	9.55914e-05
('ILCD 2.0 2018 midpoint', 'climate change', 'climate change total')	'SMR NG + CCS (MDEA), 98 (average), 700 bar' (megajoule, CH, None)	CO2 transport and storage	0.000180488
('ILCD 2.0 2018 midpoint', 'climate change', 'climate change total')	'SMR NG + CCS (MDEA), 98 (average), 700 bar' (megajoule, CH, None)	Direct CO2 emissions	0.0297827
('ILCD 2.0 2018 midpoint', 'climate change', 'climate change total')	'SMR NG + CCS (MDEA), 98 (average), 700 bar' (megajoule, CH, None)	Emissions from fuel burning in furnace	1.77218e-05
('ILCD 2.0 2018 midpoint', 'climate change', 'climate change total')	'SMR NG, 700 bar' (megajoule, CH, None)	Fuel supply chain	0.0129906
('ILCD 2.0 2018 midpoint', 'climate change', 'climate change total')	'SMR NG, 700 bar' (megajoule, CH, None)	Plant infrastructure	0.00063127
('ILCD 2.0 2018 midpoint', 'climate change', 'climate change total')	'SMR NG, 700 bar' (megajoule, CH, None)	Water supply	2.2799e-05
('ILCD 2.0 2018 midpoint', 'climate change', 'climate change total')	'SMR NG, 700 bar' (megajoule, CH, None)	Electricity from/to grid	0.00831825
('ILCD 2.0 2018 midpoint', 'climate change', 'climate change total')	'SMR NG, 700 bar' (megajoule, CH, None)	Catalysts&adsorbents	9.12173e-05
('ILCD 2.0 2018 midpoint', 'climate change', 'climate change total')	'SMR NG, 700 bar' (megajoule, CH, None)	Direct CO2 emissions	0.0746243
('ILCD 2.0 2018 midpoint', 'climate change', 'climate change total')	'SMR NG, 700 bar' (megajoule, CH, None)	Emissions from fuel burning in furnace	1.85833e-05
('ILCD 2.0 2018 midpoint', 'climate change', 'climate change total')	'SMR BM + CCS (MDEA), 98 (average)' (megajoule, CH, None)	Fuel supply chain	-0.103877
('ILCD 2.0 2018 midpoint', 'climate change', 'climate change total')	'SMR BM + CCS (MDEA), 98 (average)' (megajoule, CH, None)	Plant infrastructure	0.000631271
('ILCD 2.0 2018 midpoint', 'climate change', 'climate change total')	'SMR BM + CCS (MDEA), 98 (average)' (megajoule, CH, None)	Water supply	2.2799e-05
('ILCD 2.0 2018 midpoint', 'climate change', 'climate change total')	'SMR BM + CCS (MDEA), 98 (average)' (megajoule, CH, None)	Electricity from/to grid	0.0013016
('ILCD 2.0 2018 midpoint', 'climate change', 'climate change total')	'SMR BM + CCS (MDEA), 98 (average)' (megajoule, CH, None)	Catalysts&adsorbents	9.56024e-05
('ILCD 2.0 2018 midpoint', 'climate change', 'climate change total')	'SMR BM + CCS (MDEA), 98 (average)' (megajoule, CH, None)	CO2 transport and storage	0.00018094
('ILCD 2.0 2018 midpoint', 'climate change', 'climate change total')	'SMR BM + CCS (MDEA), 98 (average)' (megajoule, CH, None)	Direct CO2 emissions	0.0293394
('ILCD 2.0 2018 midpoint', 'climate change', 'climate change total')	'SMR BM + CCS (MDEA), 98 (average)' (megajoule, CH, None)	Emissions from fuel burning in furnace	1.83675e-05
('ILCD 2.0 2018 midpoint', 'climate change', 'climate change total')	'SMR NG, HT+LT, 700 bar' (megajoule, CH, None)	Fuel supply chain	0.0130703
('ILCD 2.0 2018 midpoint', 'climate change', 'climate change total')	'SMR NG, HT+LT, 700 bar' (megajoule, CH, None)	Plant infrastructure	0.00063127
('ILCD 2.0 2018 midpoint', 'climate change', 'climate change total')	'SMR NG, HT+LT, 700 bar' (megajoule, CH, None)	Water supply	2.2799e-05
('ILCD 2.0 2018 midpoint', 'climate change', 'climate change total')	'SMR NG, HT+LT, 700 bar' (megajoule, CH, None)	Electricity from/to grid	0.0088815
('ILCD 2.0 2018 midpoint', 'climate change', 'climate change total')	'SMR NG, HT+LT, 700 bar' (megajoule, CH, None)	Catalysts&adsorbents	9.12173e-05
('ILCD 2.0 2018 midpoint', 'climate change', 'climate change total')	'SMR NG, HT+LT, 700 bar' (megajoule, CH, None)	Direct CO2 emissions	0.0743524
('ILCD 2.0 2018 midpoint', 'climate change', 'climate change total')	'SMR NG, HT+LT, 700 bar' (megajoule, CH, None)	Emissions from fuel burning in furnace	2.72511e-05
('ILCD 2.0 2018 midpoint', 'climate change', 'climate change total')	'SMR NG/BM, HT+LT, 20:80 + CCS (MDEA), 98 (average)' (megajoule, CH, None)	Fuel supply chain	-0.078229
('ILCD 2.0 2018 midpoint', 'climate change', 'climate change total')	'SMR NG/BM, HT+LT, 20:80 + CCS (MDEA), 98 (average)' (megajoule, CH, None)	Plant infrastructure	0.000631202
('ILCD 2.0 2018 midpoint', 'climate change', 'climate change total')	'SMR NG/BM, HT+LT, 20:80 + CCS (MDEA), 98 (average)' (megajoule, CH, None)	Water supply	2.27963e-05
('ILCD 2.0 2018 midpoint', 'climate change', 'climate change total')	'SMR NG/BM, HT+LT, 20:80 + CCS (MDEA), 98 (average)' (megajoule, CH, None)	Electricity from/to grid	0.00231544
('ILCD 2.0 2018 midpoint', 'climate change', 'climate change total')	'SMR NG/BM, HT+LT, 20:80 + CCS (MDEA), 98 (average)' (megajoule, CH, None)	Catalysts&adsorbents	9.63591e-05
('ILCD 2.0 2018 midpoint', 'climate change', 'climate change total')	'SMR NG/BM, HT+LT, 20:80 + CCS (MDEA), 98 (average)' (megajoule, CH, None)	CO2 transport and storage	0.000212166
('ILCD 2.0 2018 midpoint', 'climate change', 'climate change total')	'SMR NG/BM, HT+LT, 20:80 + CCS (MDEA), 98 (average)' (megajoule, CH, None)	Direct CO2 emissions	0.0217538
('ILCD 2.0 2018 midpoint', 'climate change', 'climate change total')	'SMR NG/BM, HT+LT, 20:80 + CCS (MDEA), 98 (average)' (megajoule, CH, None)	Emissions from fuel burning in furnace	2.49028e-05
('ILCD 2.0 2018 midpoint', 'climate change', 'climate change total')	'SMR NG/BM, HT+LT, 90:10 + CCS (MDEA), 98 (average), digestate incineration' (megajoule, CH, None)	Fuel supply chain	0.00490914
('ILCD 2.0 2018 midpoint', 'climate change', 'climate change total')	'SMR NG/BM, HT+LT, 90:10 + CCS (MDEA), 98 (average), digestate incineration' (megajoule, CH, None)	Plant infrastructure	0.000631202
('ILCD 2.0 2018 midpoint', 'climate change', 'climate change total')	'SMR NG/BM, HT+LT, 90:10 + CCS (MDEA), 98 (average), digestate incineration' (megajoule, CH, None)	Water supply	2.27963e-05
('ILCD 2.0 2018 midpoint', 'climate change', 'climate change total')	'SMR NG/BM, HT+LT, 90:10 + CCS (MDEA), 98 (average), digestate incineration' (megajoule, CH, None)	Electricity from/to grid	0.00231544
('ILCD 2.0 2018 midpoint', 'climate change', 'climate change total')	'SMR NG/BM, HT+LT, 90:10 + CCS (MDEA), 98 (average), digestate incineration' (megajoule, CH, None)	Catalysts&adsorbents	9.63591e-05
('ILCD 2.0 2018 midpoint', 'climate change', 'climate change total')	'SMR NG/BM, HT+LT, 90:10 + CCS (MDEA), 98 (average), digestate incineration' (megajoule, CH, None)	CO2 transport and storage	0.000212166
('ILCD 2.0 2018 midpoint', 'climate change', 'climate change total')	'SMR NG/BM, HT+LT, 90:10 + CCS (MDEA), 98 (average), digestate incineration' (megajoule, CH, None)	Direct CO2 emissions	0.0217538
('ILCD 2.0 2018 midpoint', 'climate change', 'climate change total')	'SMR NG/BM, HT+LT, 90:10 + CCS (MDEA), 98 (average), digestate incineration' (megajoule, CH, None)	Emissions from fuel burning in furnace	2.49028e-05
('ILCD 2.0 2018 midpoint', 'climate change', 'climate change total')	'SMR BM, HT+LT, + CCS (MDEA), 98 (average), digestate incineration, 26 bar' (megajoule, CH, None)	Fuel supply chain	-0.0682049
('ILCD 2.0 2018 midpoint', 'climate change', 'climate change total')	'SMR BM, HT+LT, + CCS (MDEA), 98 (average), digestate incineration, 26 bar' (megajoule, CH, None)	Plant infrastructure	0.000631272
('ILCD 2.0 2018 midpoint', 'climate change', 'climate change total')	'SMR BM, HT+LT, + CCS (MDEA), 98 (average), digestate incineration, 26 bar' (megajoule, CH, None)	Water supply	2.2799e-05
('ILCD 2.0 2018 midpoint', 'climate change', 'climate change total')	'SMR BM, HT+LT, + CCS (MDEA), 98 (average), digestate incineration, 26 bar' (megajoule, CH, None)	Electricity from/to grid	-0.00199057
('ILCD 2.0 2018 midpoint', 'climate change', 'climate change total')	'SMR BM, HT+LT, + CCS (MDEA), 98 (average), digestate incineration, 26 bar' (megajoule, CH, None)	Catalysts&adsorbents	9.63495e-05
('ILCD 2.0 2018 midpoint', 'climate change', 'climate change total')	'SMR BM, HT+LT, + CCS (MDEA), 98 (average), digestate incineration, 26 bar' (megajoule, CH, None)	CO2 transport and storage	0.000211771
('ILCD 2.0 2018 midpoint', 'climate change', 'climate change total')	'SMR BM, HT+LT, + CCS (MDEA), 98 (average), digestate incineration, 26 bar' (megajoule, CH, None)	Direct CO2 emissions	0.0215704
('ILCD 2.0 2018 midpoint', 'climate change', 'climate change total')	'SMR BM, HT+LT, + CCS (MDEA), 98 (average), digestate incineration, 26 bar' (megajoule, CH, None)	Emissions from fuel burning in furnace	2.53969e-05
('ILCD 2.0 2018 midpoint', 'climate change', 'climate change total')	'SMR NG + CCS (MDEA), 98 (upper bound)' (megajoule, CH, None)	Fuel supply chain	0.0129097
('ILCD 2.0 2018 midpoint', 'climate change', 'climate change total')	'SMR NG + CCS (MDEA), 98 (upper bound)' (megajoule, CH, None)	Plant infrastructure	0.00063127
('ILCD 2.0 2018 midpoint', 'climate change', 'climate change total')	'SMR NG + CCS (MDEA), 98 (upper bound)' (megajoule, CH, None)	Water supply	2.2799e-05
('ILCD 2.0 2018 midpoint', 'climate change', 'climate change total')	'SMR NG + CCS (MDEA), 98 (upper bound)' (megajoule, CH, None)	Electricity from/to grid	0.00123302
('ILCD 2.0 2018 midpoint', 'climate change', 'climate change total')	'SMR NG + CCS (MDEA), 98 (upper bound)' (megajoule, CH, None)	Catalysts&adsorbents	9.55914e-05
('ILCD 2.0 2018 midpoint', 'climate change', 'climate change total')	'SMR NG + CCS (MDEA), 98 (upper bound)' (megajoule, CH, None)	CO2 transport and storage	0.000180488
('ILCD 2.0 2018 midpoint', 'climate change', 'climate change total')	'SMR NG + CCS (MDEA), 98 (upper bound)' (megajoule, CH, None)	Direct CO2 emissions	0.0297827
('ILCD 2.0 2018 midpoint', 'climate change', 'climate change total')	'SMR NG + CCS (MDEA), 98 (upper bound)' (megajoule, CH, None)	Emissions from fuel burning in furnace	1.77218e-05
('ILCD 2.0 2018 midpoint', 'climate change', 'climate change total')	'SMR NG, HT+LT, + CCS (MDEA), 98 (average), 100% BM' (megajoule, CH, None)	Fuel supply chain	-0.100998
('ILCD 2.0 2018 midpoint', 'climate change', 'climate change total')	'SMR NG, HT+LT, + CCS (MDEA), 98 (average), 100% BM' (megajoule, CH, None)	Plant infrastructure	0.000631202
('ILCD 2.0 2018 midpoint', 'climate change', 'climate change total')	'SMR NG, HT+LT, + CCS (MDEA), 98 (average), 100% BM' (megajoule, CH, None)	Water supply	2.27963e-05
('ILCD 2.0 2018 midpoint', 'climate change', 'climate change total')	'SMR NG, HT+LT, + CCS (MDEA), 98 (average), 100% BM' (megajoule, CH, None)	Electricity from/to grid	0.00231544
('ILCD 2.0 2018 midpoint', 'climate change', 'climate change total')	'SMR NG, HT+LT, + CCS (MDEA), 98 (average), 100% BM' (megajoule, CH, None)	Catalysts&adsorbents	9.63591e-05
('ILCD 2.0 2018 midpoint', 'climate change', 'climate change total')	'SMR NG, HT+LT, + CCS (MDEA), 98 (average), 100% BM' (megajoule, CH, None)	CO2 transport and storage	0.000212166
('ILCD 2.0 2018 midpoint', 'climate change', 'climate change total')	'SMR NG, HT+LT, + CCS (MDEA), 98 (average), 100% BM' (megajoule, CH, None)	Direct CO2 emissions	0.0217538
('ILCD 2.0 2018 midpoint', 'climate change', 'climate change total')	'SMR NG, HT+LT, + CCS (MDEA), 98 (average), 100% BM' (megajoule, CH, None)	Emissions from fuel burning in furnace	2.49028e-05
('ILCD 2.0 2018 midpoint', 'climate change', 'climate change total')	'SMR NG/BM, HT+LT, 65:35 + CCS (MDEA), 98 (average), digestate incineration' (megajoule, CH, None)	Fuel supply chain	-0.0149391
('ILCD 2.0 2018 midpoint', 'climate change', 'climate change total')	'SMR NG/BM, HT+LT, 65:35 + CCS (MDEA), 98 (average), digestate incineration' (megajoule, CH, None)	Plant infrastructure	0.000631202
('ILCD 2.0 2018 midpoint', 'climate change', 'climate change total')	'SMR NG/BM, HT+LT, 65:35 + CCS (MDEA), 98 (average), digestate incineration' (megajoule, CH, None)	Water supply	2.27963e-05
('ILCD 2.0 2018 midpoint', 'climate change', 'climate change total')	'SMR NG/BM, HT+LT, 65:35 + CCS (MDEA), 98 (average), digestate incineration' (megajoule, CH, None)	Electricity from/to grid	0.00231544
('ILCD 2.0 2018 midpoint', 'climate change', 'climate change total')	'SMR NG/BM, HT+LT, 65:35 + CCS (MDEA), 98 (average), digestate incineration' (megajoule, CH, None)	Catalysts&adsorbents	9.63591e-05
('ILCD 2.0 2018 midpoint', 'climate change', 'climate change total')	'SMR NG/BM, HT+LT, 65:35 + CCS (MDEA), 98 (average), digestate incineration' (megajoule, CH, None)	CO2 transport and storage	0.000212166
('ILCD 2.0 2018 midpoint', 'climate change', 'climate change total')	'SMR NG/BM, HT+LT, 65:35 + CCS (MDEA), 98 (average), digestate incineration' (megajoule, CH, None)	Direct CO2 emissions	0.0217538
('ILCD 2.0 2018 midpoint', 'climate change', 'climate change total')	'SMR NG/BM, HT+LT, 65:35 + CCS (MDEA), 98 (average), digestate incineration' (megajoule, CH, None)	Emissions from fuel burning in furnace	2.49028e-05
('ILCD 2.0 2018 midpoint', 'climate change', 'climate change total')	'SMR NG + CCS (MDEA), 90 (average)' (megajoule, CH, None)	Fuel supply chain	0.0129439
('ILCD 2.0 2018 midpoint', 'climate change', 'climate change total')	'SMR NG + CCS (MDEA), 90 (average)' (megajoule, CH, None)	Plant infrastructure	0.000631278
('ILCD 2.0 2018 midpoint', 'climate change', 'climate change total')	'SMR NG + CCS (MDEA), 90 (average)' (megajoule, CH, None)	Water supply	2.27992e-05
('ILCD 2.0 2018 midpoint', 'climate change', 'climate change total')	'SMR NG + CCS (MDEA), 90 (average)' (megajoule, CH, None)	Electricity from/to grid	0.000867562
('ILCD 2.0 2018 midpoint', 'climate change', 'climate change total')	'SMR NG + CCS (MDEA), 90 (average)' (megajoule, CH, None)	Catalysts&adsorbents	9.52375e-05
('ILCD 2.0 2018 midpoint', 'climate change', 'climate change total')	'SMR NG + CCS (MDEA), 90 (average)' (megajoule, CH, None)	CO2 transport and storage	0.000165885
('ILCD 2.0 2018 midpoint', 'climate change', 'climate change total')	'SMR NG + CCS (MDEA), 90 (average)' (megajoule, CH, None)	Direct CO2 emissions	0.0335096
('ILCD 2.0 2018 midpoint', 'climate change', 'climate change total')	'SMR NG + CCS (MDEA), 90 (average)' (megajoule, CH, None)	Emissions from fuel burning in furnace	1.80837e-05
('ILCD 2.0 2018 midpoint', 'climate change', 'climate change total')	'SMR NG/BM, HT+LT, 5:95 + CCS (MDEA), 98 (average), digestate incineration' (megajoule, CH, None)	Fuel supply chain	-0.0625748
('ILCD 2.0 2018 midpoint', 'climate change', 'climate change total')	'SMR NG/BM, HT+LT, 5:95 + CCS (MDEA), 98 (average), digestate incineration' (megajoule, CH, None)	Plant infrastructure	0.000631202
('ILCD 2.0 2018 midpoint', 'climate change', 'climate change total')	'SMR NG/BM, HT+LT, 5:95 + CCS (MDEA), 98 (average), digestate incineration' (megajoule, CH, None)	Water supply	2.27963e-05
('ILCD 2.0 2018 midpoint', 'climate change', 'climate change total')	'SMR NG/BM, HT+LT, 5:95 + CCS (MDEA), 98 (average), digestate incineration' (megajoule, CH, None)	Electricity from/to grid	0.00231544
('ILCD 2.0 2018 midpoint', 'climate change', 'climate change total')	'SMR NG/BM, HT+LT, 5:95 + CCS (MDEA), 98 (average), digestate incineration' (megajoule, CH, None)	Catalysts&adsorbents	9.63591e-05
('ILCD 2.0 2018 midpoint', 'climate change', 'climate change total')	'SMR NG/BM, HT+LT, 5:95 + CCS (MDEA), 98 (average), digestate incineration' (megajoule, CH, None)	CO2 transport and storage	0.000212166
('ILCD 2.0 2018 midpoint', 'climate change', 'climate change total')	'SMR NG/BM, HT+LT, 5:95 + CCS (MDEA), 98 (average), digestate incineration' (megajoule, CH, None)	Direct CO2 emissions	0.0217538
('ILCD 2.0 2018 midpoint', 'climate change', 'climate change total')	'SMR NG/BM, HT+LT, 5:95 + CCS (MDEA), 98 (average), digestate incineration' (megajoule, CH, None)	Emissions from fuel burning in furnace	2.49028e-05
('ILCD 2.0 2018 midpoint', 'climate change', 'climate change total')	'SMR NG, HT+LT, +CCS (VPSA), 98 (average), hydropower electricity' (megajoule, CH, None)	Fuel supply chain	0.0129348
('ILCD 2.0 2018 midpoint', 'climate change', 'climate change total')	'SMR NG, HT+LT, +CCS (VPSA), 98 (average), hydropower electricity' (megajoule, CH, None)	Plant infrastructure	0.000631268
('ILCD 2.0 2018 midpoint', 'climate change', 'climate change total')	'SMR NG, HT+LT, +CCS (VPSA), 98 (average), hydropower electricity' (megajoule, CH, None)	Water supply	2.27989e-05
('ILCD 2.0 2018 midpoint', 'climate change', 'climate change total')	'SMR NG, HT+LT, +CCS (VPSA), 98 (average), hydropower electricity' (megajoule, CH, None)	Electricity from/to grid	4.34951e-05
('ILCD 2.0 2018 midpoint', 'climate change', 'climate change total')	'SMR NG, HT+LT, +CCS (VPSA), 98 (average), hydropower electricity' (megajoule, CH, None)	Catalysts&adsorbents	9.12173e-05
('ILCD 2.0 2018 midpoint', 'climate change', 'climate change total')	'SMR NG, HT+LT, +CCS (VPSA), 98 (average), hydropower electricity' (megajoule, CH, None)	CO2 transport and storage	0.000211924
('ILCD 2.0 2018 midpoint', 'climate change', 'climate change total')	'SMR NG, HT+LT, +CCS (VPSA), 98 (average), hydropower electricity' (megajoule, CH, None)	Direct CO2 emissions	0.0215558
('ILCD 2.0 2018 midpoint', 'climate change', 'climate change total')	'SMR NG, HT+LT, +CCS (VPSA), 98 (average), hydropower electricity' (megajoule, CH, None)	Emissions from fuel burning in furnace	2.89529e-05
('ILCD 2.0 2018 midpoint', 'climate change', 'climate change total')	'SMR NG + CCS (MDEA), 98 (lower bound)' (megajoule, CH, None)	Fuel supply chain	0.0129097
('ILCD 2.0 2018 midpoint', 'climate change', 'climate change total')	'SMR NG + CCS (MDEA), 98 (lower bound)' (megajoule, CH, None)	Plant infrastructure	0.00063127
('ILCD 2.0 2018 midpoint', 'climate change', 'climate change total')	'SMR NG + CCS (MDEA), 98 (lower bound)' (megajoule, CH, None)	Water supply	2.2799e-05
('ILCD 2.0 2018 midpoint', 'climate change', 'climate change total')	'SMR NG + CCS (MDEA), 98 (lower bound)' (megajoule, CH, None)	Electricity from/to grid	0.0012056
('ILCD 2.0 2018 midpoint', 'climate change', 'climate change total')	'SMR NG + CCS (MDEA), 98 (lower bound)' (megajoule, CH, None)	Catalysts&adsorbents	9.55914e-05
('ILCD 2.0 2018 midpoint', 'climate change', 'climate change total')	'SMR NG + CCS (MDEA), 98 (lower bound)' (megajoule, CH, None)	CO2 transport and storage	0.000180488
('ILCD 2.0 2018 midpoint', 'climate change', 'climate change total')	'SMR NG + CCS (MDEA), 98 (lower bound)' (megajoule, CH, None)	Direct CO2 emissions	0.0297827
('ILCD 2.0 2018 midpoint', 'climate change', 'climate change total')	'SMR NG + CCS (MDEA), 98 (lower bound)' (megajoule, CH, None)	Emissions from fuel burning in furnace	1.77218e-05
('ILCD 2.0 2018 midpoint', 'climate change', 'climate change total')	'SMR NG/BM, HT+LT, 95:5 + CCS (MDEA), 98 (average), digestate incineration' (megajoule, CH, None)	Fuel supply chain	0.00887878
('ILCD 2.0 2018 midpoint', 'climate change', 'climate change total')	'SMR NG/BM, HT+LT, 95:5 + CCS (MDEA), 98 (average), digestate incineration' (megajoule, CH, None)	Plant infrastructure	0.000631202
('ILCD 2.0 2018 midpoint', 'climate change', 'climate change total')	'SMR NG/BM, HT+LT, 95:5 + CCS (MDEA), 98 (average), digestate incineration' (megajoule, CH, None)	Water supply	2.27963e-05
('ILCD 2.0 2018 midpoint', 'climate change', 'climate change total')	'SMR NG/BM, HT+LT, 95:5 + CCS (MDEA), 98 (average), digestate incineration' (megajoule, CH, None)	Electricity from/to grid	0.00231544
('ILCD 2.0 2018 midpoint', 'climate change', 'climate change total')	'SMR NG/BM, HT+LT, 95:5 + CCS (MDEA), 98 (average), digestate incineration' (megajoule, CH, None)	Catalysts&adsorbents	9.63591e-05
('ILCD 2.0 2018 midpoint', 'climate change', 'climate change total')	'SMR NG/BM, HT+LT, 95:5 + CCS (MDEA), 98 (average), digestate incineration' (megajoule, CH, None)	CO2 transport and storage	0.000212166
('ILCD 2.0 2018 midpoint', 'climate change', 'climate change total')	'SMR NG/BM, HT+LT, 95:5 + CCS (MDEA), 98 (average), digestate incineration' (megajoule, CH, None)	Direct CO2 emissions	0.0217538
('ILCD 2.0 2018 midpoint', 'climate change', 'climate change total')	'SMR NG/BM, HT+LT, 95:5 + CCS (MDEA), 98 (average), digestate incineration' (megajoule, CH, None)	Emissions from fuel burning in furnace	2.49028e-05
('ILCD 2.0 2018 midpoint', 'climate change', 'climate change total')	'SMR NG/BM, HT+LT, 10:90 + CCS (MDEA), 98 (average), digestate incineration' (megajoule, CH, None)	Fuel supply chain	-0.0586051
('ILCD 2.0 2018 midpoint', 'climate change', 'climate change total')	'SMR NG/BM, HT+LT, 10:90 + CCS (MDEA), 98 (average), digestate incineration' (megajoule, CH, None)	Plant infrastructure	0.000631202
('ILCD 2.0 2018 midpoint', 'climate change', 'climate change total')	'SMR NG/BM, HT+LT, 10:90 + CCS (MDEA), 98 (average), digestate incineration' (megajoule, CH, None)	Water supply	2.27963e-05
('ILCD 2.0 2018 midpoint', 'climate change', 'climate change total')	'SMR NG/BM, HT+LT, 10:90 + CCS (MDEA), 98 (average), digestate incineration' (megajoule, CH, None)	Electricity from/to grid	0.00231544
('ILCD 2.0 2018 midpoint', 'climate change', 'climate change total')	'SMR NG/BM, HT+LT, 10:90 + CCS (MDEA), 98 (average), digestate incineration' (megajoule, CH, None)	Catalysts&adsorbents	9.63591e-05
('ILCD 2.0 2018 midpoint', 'climate change', 'climate change total')	'SMR NG/BM, HT+LT, 10:90 + CCS (MDEA), 98 (average), digestate incineration' (megajoule, CH, None)	CO2 transport and storage	0.000212166
('ILCD 2.0 2018 midpoint', 'climate change', 'climate change total')	'SMR NG/BM, HT+LT, 10:90 + CCS (MDEA), 98 (average), digestate incineration' (megajoule, CH, None)	Direct CO2 emissions	0.0217538
('ILCD 2.0 2018 midpoint', 'climate change', 'climate change total')	'SMR NG/BM, HT+LT, 10:90 + CCS (MDEA), 98 (average), digestate incineration' (megajoule, CH, None)	Emissions from fuel burning in furnace	2.49028e-05
('ILCD 2.0 2018 midpoint', 'climate change', 'climate change total')	'SMR NG/BM, HT+LT, 30:70 + CCS (MDEA), 98 (average)' (megajoule, CH, None)	Fuel supply chain	-0.0668443
('ILCD 2.0 2018 midpoint', 'climate change', 'climate change total')	'SMR NG/BM, HT+LT, 30:70 + CCS (MDEA), 98 (average)' (megajoule, CH, None)	Plant infrastructure	0.000631202
('ILCD 2.0 2018 midpoint', 'climate change', 'climate change total')	'SMR NG/BM, HT+LT, 30:70 + CCS (MDEA), 98 (average)' (megajoule, CH, None)	Water supply	2.27963e-05
('ILCD 2.0 2018 midpoint', 'climate change', 'climate change total')	'SMR NG/BM, HT+LT, 30:70 + CCS (MDEA), 98 (average)' (megajoule, CH, None)	Electricity from/to grid	0.00231544
('ILCD 2.0 2018 midpoint', 'climate change', 'climate change total')	'SMR NG/BM, HT+LT, 30:70 + CCS (MDEA), 98 (average)' (megajoule, CH, None)	Catalysts&adsorbents	9.63591e-05
('ILCD 2.0 2018 midpoint', 'climate change', 'climate change total')	'SMR NG/BM, HT+LT, 30:70 + CCS (MDEA), 98 (average)' (megajoule, CH, None)	CO2 transport and storage	0.000212166
('ILCD 2.0 2018 midpoint', 'climate change', 'climate change total')	'SMR NG/BM, HT+LT, 30:70 + CCS (MDEA), 98 (average)' (megajoule, CH, None)	Direct CO2 emissions	0.0217538
('ILCD 2.0 2018 midpoint', 'climate change', 'climate change total')	'SMR NG/BM, HT+LT, 30:70 + CCS (MDEA), 98 (average)' (megajoule, CH, None)	Emissions from fuel burning in furnace	2.49028e-05
('ILCD 2.0 2018 midpoint', 'climate change', 'climate change total')	'SMR NG/BM, HT+LT, 70:30 + CCS (MDEA), 98 (average)' (megajoule, CH, None)	Fuel supply chain	-0.0213056
('ILCD 2.0 2018 midpoint', 'climate change', 'climate change total')	'SMR NG/BM, HT+LT, 70:30 + CCS (MDEA), 98 (average)' (megajoule, CH, None)	Plant infrastructure	0.000631202
('ILCD 2.0 2018 midpoint', 'climate change', 'climate change total')	'SMR NG/BM, HT+LT, 70:30 + CCS (MDEA), 98 (average)' (megajoule, CH, None)	Water supply	2.27963e-05
('ILCD 2.0 2018 midpoint', 'climate change', 'climate change total')	'SMR NG/BM, HT+LT, 70:30 + CCS (MDEA), 98 (average)' (megajoule, CH, None)	Electricity from/to grid	0.00231544
('ILCD 2.0 2018 midpoint', 'climate change', 'climate change total')	'SMR NG/BM, HT+LT, 70:30 + CCS (MDEA), 98 (average)' (megajoule, CH, None)	Catalysts&adsorbents	9.63591e-05
('ILCD 2.0 2018 midpoint', 'climate change', 'climate change total')	'SMR NG/BM, HT+LT, 70:30 + CCS (MDEA), 98 (average)' (megajoule, CH, None)	CO2 transport and storage	0.000212166
('ILCD 2.0 2018 midpoint', 'climate change', 'climate change total')	'SMR NG/BM, HT+LT, 70:30 + CCS (MDEA), 98 (average)' (megajoule, CH, None)	Direct CO2 emissions	0.0217538
('ILCD 2.0 2018 midpoint', 'climate change', 'climate change total')	'SMR NG/BM, HT+LT, 70:30 + CCS (MDEA), 98 (average)' (megajoule, CH, None)	Emissions from fuel burning in furnace	2.49028e-05
('ILCD 2.0 2018 midpoint', 'climate change', 'climate change total')	'SMR BM + CCS (VPSA), 98 (upper bound)' (megajoule, CH, None)	Fuel supply chain	-0.105275
('ILCD 2.0 2018 midpoint', 'climate change', 'climate change total')	'SMR BM + CCS (VPSA), 98 (upper bound)' (megajoule, CH, None)	Plant infrastructure	0.00063125
('ILCD 2.0 2018 midpoint', 'climate change', 'climate change total')	'SMR BM + CCS (VPSA), 98 (upper bound)' (megajoule, CH, None)	Water supply	2.27982e-05
('ILCD 2.0 2018 midpoint', 'climate change', 'climate change total')	'SMR BM + CCS (VPSA), 98 (upper bound)' (megajoule, CH, None)	Electricity from/to grid	0.00238161
('ILCD 2.0 2018 midpoint', 'climate change', 'climate change total')	'SMR BM + CCS (VPSA), 98 (upper bound)' (megajoule, CH, None)	Catalysts&adsorbents	9.12173e-05
('ILCD 2.0 2018 midpoint', 'climate change', 'climate change total')	'SMR BM + CCS (VPSA), 98 (upper bound)' (megajoule, CH, None)	CO2 transport and storage	0.000182572
('ILCD 2.0 2018 midpoint', 'climate change', 'climate change total')	'SMR BM + CCS (VPSA), 98 (upper bound)' (megajoule, CH, None)	Direct CO2 emissions	0.0286823
('ILCD 2.0 2018 midpoint', 'climate change', 'climate change total')	'SMR BM + CCS (VPSA), 98 (upper bound)' (megajoule, CH, None)	Emissions from fuel burning in furnace	2.02464e-05
('ILCD 2.0 2018 midpoint', 'climate change', 'climate change total')	'SMR BM, HT+LT, + CCS (VPSA), 98 (average), cut-off approach' (megajoule, CH, None)	Fuel supply chain	0.0828361
('ILCD 2.0 2018 midpoint', 'climate change', 'climate change total')	'SMR BM, HT+LT, + CCS (VPSA), 98 (average), cut-off approach' (megajoule, CH, None)	Plant infrastructure	0.000631292
('ILCD 2.0 2018 midpoint', 'climate change', 'climate change total')	'SMR BM, HT+LT, + CCS (VPSA), 98 (average), cut-off approach' (megajoule, CH, None)	Water supply	2.27998e-05
('ILCD 2.0 2018 midpoint', 'climate change', 'climate change total')	'SMR BM, HT+LT, + CCS (VPSA), 98 (average), cut-off approach' (megajoule, CH, None)	Electricity from/to grid	0.0026698
('ILCD 2.0 2018 midpoint', 'climate change', 'climate change total')	'SMR BM, HT+LT, + CCS (VPSA), 98 (average), cut-off approach' (megajoule, CH, None)	Catalysts&adsorbents	9.12173e-05
('ILCD 2.0 2018 midpoint', 'climate change', 'climate change total')	'SMR BM, HT+LT, + CCS (VPSA), 98 (average), cut-off approach' (megajoule, CH, None)	CO2 transport and storage	0.000210588
('ILCD 2.0 2018 midpoint', 'climate change', 'climate change total')	'SMR BM, HT+LT, + CCS (VPSA), 98 (average), cut-off approach' (megajoule, CH, None)	Direct CO2 emissions	0.0217244
('ILCD 2.0 2018 midpoint', 'climate change', 'climate change total')	'SMR BM, HT+LT, + CCS (VPSA), 98 (average), cut-off approach' (megajoule, CH, None)	Emissions from fuel burning in furnace	2.86676e-05
('ILCD 2.0 2018 midpoint', 'climate change', 'climate change total')	'SMR NG/BM, HT+LT, 60:40 + CCS (MDEA), 98 (average)' (megajoule, CH, None)	Fuel supply chain	-0.0326903
('ILCD 2.0 2018 midpoint', 'climate change', 'climate change total')	'SMR NG/BM, HT+LT, 60:40 + CCS (MDEA), 98 (average)' (megajoule, CH, None)	Plant infrastructure	0.000631202
('ILCD 2.0 2018 midpoint', 'climate change', 'climate change total')	'SMR NG/BM, HT+LT, 60:40 + CCS (MDEA), 98 (average)' (megajoule, CH, None)	Water supply	2.27963e-05
('ILCD 2.0 2018 midpoint', 'climate change', 'climate change total')	'SMR NG/BM, HT+LT, 60:40 + CCS (MDEA), 98 (average)' (megajoule, CH, None)	Electricity from/to grid	0.00231544
('ILCD 2.0 2018 midpoint', 'climate change', 'climate change total')	'SMR NG/BM, HT+LT, 60:40 + CCS (MDEA), 98 (average)' (megajoule, CH, None)	Catalysts&adsorbents	9.63591e-05
('ILCD 2.0 2018 midpoint', 'climate change', 'climate change total')	'SMR NG/BM, HT+LT, 60:40 + CCS (MDEA), 98 (average)' (megajoule, CH, None)	CO2 transport and storage	0.000212166
('ILCD 2.0 2018 midpoint', 'climate change', 'climate change total')	'SMR NG/BM, HT+LT, 60:40 + CCS (MDEA), 98 (average)' (megajoule, CH, None)	Direct CO2 emissions	0.0217538
('ILCD 2.0 2018 midpoint', 'climate change', 'climate change total')	'SMR NG/BM, HT+LT, 60:40 + CCS (MDEA), 98 (average)' (megajoule, CH, None)	Emissions from fuel burning in furnace	2.49028e-05
('ILCD 2.0 2018 midpoint', 'climate change', 'climate change total')	'SMR NG/BM, HT+LT, 90:10 + CCS (MDEA), 98 (average)' (megajoule, CH, None)	Fuel supply chain	0.00146375
('ILCD 2.0 2018 midpoint', 'climate change', 'climate change total')	'SMR NG/BM, HT+LT, 90:10 + CCS (MDEA), 98 (average)' (megajoule, CH, None)	Plant infrastructure	0.000631202
('ILCD 2.0 2018 midpoint', 'climate change', 'climate change total')	'SMR NG/BM, HT+LT, 90:10 + CCS (MDEA), 98 (average)' (megajoule, CH, None)	Water supply	2.27963e-05
('ILCD 2.0 2018 midpoint', 'climate change', 'climate change total')	'SMR NG/BM, HT+LT, 90:10 + CCS (MDEA), 98 (average)' (megajoule, CH, None)	Electricity from/to grid	0.00231544
('ILCD 2.0 2018 midpoint', 'climate change', 'climate change total')	'SMR NG/BM, HT+LT, 90:10 + CCS (MDEA), 98 (average)' (megajoule, CH, None)	Catalysts&adsorbents	9.63591e-05
('ILCD 2.0 2018 midpoint', 'climate change', 'climate change total')	'SMR NG/BM, HT+LT, 90:10 + CCS (MDEA), 98 (average)' (megajoule, CH, None)	CO2 transport and storage	0.000212166
('ILCD 2.0 2018 midpoint', 'climate change', 'climate change total')	'SMR NG/BM, HT+LT, 90:10 + CCS (MDEA), 98 (average)' (megajoule, CH, None)	Direct CO2 emissions	0.0217538
('ILCD 2.0 2018 midpoint', 'climate change', 'climate change total')	'SMR NG/BM, HT+LT, 90:10 + CCS (MDEA), 98 (average)' (megajoule, CH, None)	Emissions from fuel burning in furnace	2.49028e-05
('ILCD 2.0 2018 midpoint', 'climate change', 'climate change total')	'SMR BM + CCS (VPSA), 98 (lower bound)' (megajoule, CH, None)	Fuel supply chain	-0.104526
('ILCD 2.0 2018 midpoint', 'climate change', 'climate change total')	'SMR BM + CCS (VPSA), 98 (lower bound)' (megajoule, CH, None)	Plant infrastructure	0.000631263
('ILCD 2.0 2018 midpoint', 'climate change', 'climate change total')	'SMR BM + CCS (VPSA), 98 (lower bound)' (megajoule, CH, None)	Water supply	2.27987e-05
('ILCD 2.0 2018 midpoint', 'climate change', 'climate change total')	'SMR BM + CCS (VPSA), 98 (lower bound)' (megajoule, CH, None)	Electricity from/to grid	0.00201961
('ILCD 2.0 2018 midpoint', 'climate change', 'climate change total')	'SMR BM + CCS (VPSA), 98 (lower bound)' (megajoule, CH, None)	Catalysts&adsorbents	9.12173e-05
('ILCD 2.0 2018 midpoint', 'climate change', 'climate change total')	'SMR BM + CCS (VPSA), 98 (lower bound)' (megajoule, CH, None)	CO2 transport and storage	0.000182454
('ILCD 2.0 2018 midpoint', 'climate change', 'climate change total')	'SMR BM + CCS (VPSA), 98 (lower bound)' (megajoule, CH, None)	Direct CO2 emissions	0.0285484
('ILCD 2.0 2018 midpoint', 'climate change', 'climate change total')	'SMR BM + CCS (VPSA), 98 (lower bound)' (megajoule, CH, None)	Emissions from fuel burning in furnace	2.15515e-05
('ILCD 2.0 2018 midpoint', 'climate change', 'climate change total')	'SMR BM' (megajoule, CH, None)	Fuel supply chain	-0.104869
('ILCD 2.0 2018 midpoint', 'climate change', 'climate change total')	'SMR BM' (megajoule, CH, None)	Plant infrastructure	0.00063127
('ILCD 2.0 2018 midpoint', 'climate change', 'climate change total')	'SMR BM' (megajoule, CH, None)	Water supply	2.2799e-05
('ILCD 2.0 2018 midpoint', 'climate change', 'climate change total')	'SMR BM' (megajoule, CH, None)	Electricity from/to grid	-0.000661293
('ILCD 2.0 2018 midpoint', 'climate change', 'climate change total')	'SMR BM' (megajoule, CH, None)	Catalysts&adsorbents	9.12173e-05
('ILCD 2.0 2018 midpoint', 'climate change', 'climate change total')	'SMR BM' (megajoule, CH, None)	Direct CO2 emissions	0.0737682
('ILCD 2.0 2018 midpoint', 'climate change', 'climate change total')	'SMR BM' (megajoule, CH, None)	Emissions from fuel burning in furnace	1.97353e-05
('ILCD 2.0 2018 midpoint', 'climate change', 'climate change total')	'SMR BM, HT+LT, + CCS (MDEA), 90 (lower bound)' (megajoule, CH, None)	Fuel supply chain	-0.103723
('ILCD 2.0 2018 midpoint', 'climate change', 'climate change total')	'SMR BM, HT+LT, + CCS (MDEA), 90 (lower bound)' (megajoule, CH, None)	Plant infrastructure	0.000631272
('ILCD 2.0 2018 midpoint', 'climate change', 'climate change total')	'SMR BM, HT+LT, + CCS (MDEA), 90 (lower bound)' (megajoule, CH, None)	Water supply	2.2799e-05
('ILCD 2.0 2018 midpoint', 'climate change', 'climate change total')	'SMR BM, HT+LT, + CCS (MDEA), 90 (lower bound)' (megajoule, CH, None)	Electricity from/to grid	0.00188663
('ILCD 2.0 2018 midpoint', 'climate change', 'climate change total')	'SMR BM, HT+LT, + CCS (MDEA), 90 (lower bound)' (megajoule, CH, None)	Catalysts&adsorbents	9.59341e-05
('ILCD 2.0 2018 midpoint', 'climate change', 'climate change total')	'SMR BM, HT+LT, + CCS (MDEA), 90 (lower bound)' (megajoule, CH, None)	CO2 transport and storage	0.000194627
('ILCD 2.0 2018 midpoint', 'climate change', 'climate change total')	'SMR BM, HT+LT, + CCS (MDEA), 90 (lower bound)' (megajoule, CH, None)	Direct CO2 emissions	0.0264145
('ILCD 2.0 2018 midpoint', 'climate change', 'climate change total')	'SMR BM, HT+LT, + CCS (MDEA), 90 (lower bound)' (megajoule, CH, None)	Emissions from fuel burning in furnace	2.56673e-05
('ILCD 2.0 2018 midpoint', 'climate change', 'climate change total')	'SMR BM, HT+LT, hydropower electricity' (megajoule, CH, None)	Fuel supply chain	-0.105617
('ILCD 2.0 2018 midpoint', 'climate change', 'climate change total')	'SMR BM, HT+LT, hydropower electricity' (megajoule, CH, None)	Plant infrastructure	0.00063127
('ILCD 2.0 2018 midpoint', 'climate change', 'climate change total')	'SMR BM, HT+LT, hydropower electricity' (megajoule, CH, None)	Water supply	2.2799e-05
('ILCD 2.0 2018 midpoint', 'climate change', 'climate change total')	'SMR BM, HT+LT, hydropower electricity' (megajoule, CH, None)	Electricity from/to grid	-2.9165e-06
('ILCD 2.0 2018 midpoint', 'climate change', 'climate change total')	'SMR BM, HT+LT, hydropower electricity' (megajoule, CH, None)	Catalysts&adsorbents	9.12173e-05
('ILCD 2.0 2018 midpoint', 'climate change', 'climate change total')	'SMR BM, HT+LT, hydropower electricity' (megajoule, CH, None)	Direct CO2 emissions	0.0742943
('ILCD 2.0 2018 midpoint', 'climate change', 'climate change total')	'SMR BM, HT+LT, hydropower electricity' (megajoule, CH, None)	Emissions from fuel burning in furnace	2.81718e-05
('ILCD 2.0 2018 midpoint', 'climate change', 'climate change total')	'SMR NG/BM, HT+LT, 50:50 + CCS (MDEA), 98 (average)' (megajoule, CH, None)	Fuel supply chain	-0.044075
('ILCD 2.0 2018 midpoint', 'climate change', 'climate change total')	'SMR NG/BM, HT+LT, 50:50 + CCS (MDEA), 98 (average)' (megajoule, CH, None)	Plant infrastructure	0.000631202
('ILCD 2.0 2018 midpoint', 'climate change', 'climate change total')	'SMR NG/BM, HT+LT, 50:50 + CCS (MDEA), 98 (average)' (megajoule, CH, None)	Water supply	2.27963e-05
('ILCD 2.0 2018 midpoint', 'climate change', 'climate change total')	'SMR NG/BM, HT+LT, 50:50 + CCS (MDEA), 98 (average)' (megajoule, CH, None)	Electricity from/to grid	0.00231544
('ILCD 2.0 2018 midpoint', 'climate change', 'climate change total')	'SMR NG/BM, HT+LT, 50:50 + CCS (MDEA), 98 (average)' (megajoule, CH, None)	Catalysts&adsorbents	9.63591e-05
('ILCD 2.0 2018 midpoint', 'climate change', 'climate change total')	'SMR NG/BM, HT+LT, 50:50 + CCS (MDEA), 98 (average)' (megajoule, CH, None)	CO2 transport and storage	0.000212166
('ILCD 2.0 2018 midpoint', 'climate change', 'climate change total')	'SMR NG/BM, HT+LT, 50:50 + CCS (MDEA), 98 (average)' (megajoule, CH, None)	Direct CO2 emissions	0.0217538
('ILCD 2.0 2018 midpoint', 'climate change', 'climate change total')	'SMR NG/BM, HT+LT, 50:50 + CCS (MDEA), 98 (average)' (megajoule, CH, None)	Emissions from fuel burning in furnace	2.49028e-05
('ILCD 2.0 2018 midpoint', 'climate change', 'climate change total')	'SMR NG + CCS (VPSA), 98 (upper bound)' (megajoule, CH, None)	Fuel supply chain	0.0129613
('ILCD 2.0 2018 midpoint', 'climate change', 'climate change total')	'SMR NG + CCS (VPSA), 98 (upper bound)' (megajoule, CH, None)	Plant infrastructure	0.000631274
('ILCD 2.0 2018 midpoint', 'climate change', 'climate change total')	'SMR NG + CCS (VPSA), 98 (upper bound)' (megajoule, CH, None)	Water supply	2.27991e-05
('ILCD 2.0 2018 midpoint', 'climate change', 'climate change total')	'SMR NG + CCS (VPSA), 98 (upper bound)' (megajoule, CH, None)	Electricity from/to grid	0.00257792
('ILCD 2.0 2018 midpoint', 'climate change', 'climate change total')	'SMR NG + CCS (VPSA), 98 (upper bound)' (megajoule, CH, None)	Catalysts&adsorbents	9.12173e-05
('ILCD 2.0 2018 midpoint', 'climate change', 'climate change total')	'SMR NG + CCS (VPSA), 98 (upper bound)' (megajoule, CH, None)	CO2 transport and storage	0.000182148
('ILCD 2.0 2018 midpoint', 'climate change', 'climate change total')	'SMR NG + CCS (VPSA), 98 (upper bound)' (megajoule, CH, None)	Direct CO2 emissions	0.0288547
('ILCD 2.0 2018 midpoint', 'climate change', 'climate change total')	'SMR NG + CCS (VPSA), 98 (upper bound)' (megajoule, CH, None)	Emissions from fuel burning in furnace	1.82582e-05
('ILCD 2.0 2018 midpoint', 'climate change', 'climate change total')	'SMR NG, HT+LT, + CCS (MDEA), 98 (lower bound)' (megajoule, CH, None)	Fuel supply chain	0.0128484
('ILCD 2.0 2018 midpoint', 'climate change', 'climate change total')	'SMR NG, HT+LT, + CCS (MDEA), 98 (lower bound)' (megajoule, CH, None)	Plant infrastructure	0.000631202
('ILCD 2.0 2018 midpoint', 'climate change', 'climate change total')	'SMR NG, HT+LT, + CCS (MDEA), 98 (lower bound)' (megajoule, CH, None)	Water supply	2.27963e-05
('ILCD 2.0 2018 midpoint', 'climate change', 'climate change total')	'SMR NG, HT+LT, + CCS (MDEA), 98 (lower bound)' (megajoule, CH, None)	Electricity from/to grid	0.00230278
('ILCD 2.0 2018 midpoint', 'climate change', 'climate change total')	'SMR NG, HT+LT, + CCS (MDEA), 98 (lower bound)' (megajoule, CH, None)	Catalysts&adsorbents	9.63591e-05
('ILCD 2.0 2018 midpoint', 'climate change', 'climate change total')	'SMR NG, HT+LT, + CCS (MDEA), 98 (lower bound)' (megajoule, CH, None)	CO2 transport and storage	0.000212166
('ILCD 2.0 2018 midpoint', 'climate change', 'climate change total')	'SMR NG, HT+LT, + CCS (MDEA), 98 (lower bound)' (megajoule, CH, None)	Direct CO2 emissions	0.0217538
('ILCD 2.0 2018 midpoint', 'climate change', 'climate change total')	'SMR NG, HT+LT, + CCS (MDEA), 98 (lower bound)' (megajoule, CH, None)	Emissions from fuel burning in furnace	2.49028e-05
('ILCD 2.0 2018 midpoint', 'climate change', 'climate change total')	'SMR NG/BM, HT+LT, 95:5 + CCS (MDEA), 98 (average)' (megajoule, CH, None)	Fuel supply chain	0.00715608
('ILCD 2.0 2018 midpoint', 'climate change', 'climate change total')	'SMR NG/BM, HT+LT, 95:5 + CCS (MDEA), 98 (average)' (megajoule, CH, None)	Plant infrastructure	0.000631202
('ILCD 2.0 2018 midpoint', 'climate change', 'climate change total')	'SMR NG/BM, HT+LT, 95:5 + CCS (MDEA), 98 (average)' (megajoule, CH, None)	Water supply	2.27963e-05
('ILCD 2.0 2018 midpoint', 'climate change', 'climate change total')	'SMR NG/BM, HT+LT, 95:5 + CCS (MDEA), 98 (average)' (megajoule, CH, None)	Electricity from/to grid	0.00231544
('ILCD 2.0 2018 midpoint', 'climate change', 'climate change total')	'SMR NG/BM, HT+LT, 95:5 + CCS (MDEA), 98 (average)' (megajoule, CH, None)	Catalysts&adsorbents	9.63591e-05
('ILCD 2.0 2018 midpoint', 'climate change', 'climate change total')	'SMR NG/BM, HT+LT, 95:5 + CCS (MDEA), 98 (average)' (megajoule, CH, None)	CO2 transport and storage	0.000212166
('ILCD 2.0 2018 midpoint', 'climate change', 'climate change total')	'SMR NG/BM, HT+LT, 95:5 + CCS (MDEA), 98 (average)' (megajoule, CH, None)	Direct CO2 emissions	0.0217538
('ILCD 2.0 2018 midpoint', 'climate change', 'climate change total')	'SMR NG/BM, HT+LT, 95:5 + CCS (MDEA), 98 (average)' (megajoule, CH, None)	Emissions from fuel burning in furnace	2.49028e-05
('ILCD 2.0 2018 midpoint', 'climate change', 'climate change total')	'SMR BM, HT+LT, + CCS (VPSA), 98 (lower bound)' (megajoule, CH, None)	Fuel supply chain	-0.103992
('ILCD 2.0 2018 midpoint', 'climate change', 'climate change total')	'SMR BM, HT+LT, + CCS (VPSA), 98 (lower bound)' (megajoule, CH, None)	Plant infrastructure	0.000631301
('ILCD 2.0 2018 midpoint', 'climate change', 'climate change total')	'SMR BM, HT+LT, + CCS (VPSA), 98 (lower bound)' (megajoule, CH, None)	Water supply	2.28001e-05
('ILCD 2.0 2018 midpoint', 'climate change', 'climate change total')	'SMR BM, HT+LT, + CCS (VPSA), 98 (lower bound)' (megajoule, CH, None)	Electricity from/to grid	0.00250715
('ILCD 2.0 2018 midpoint', 'climate change', 'climate change total')	'SMR BM, HT+LT, + CCS (VPSA), 98 (lower bound)' (megajoule, CH, None)	Catalysts&adsorbents	9.12173e-05
('ILCD 2.0 2018 midpoint', 'climate change', 'climate change total')	'SMR BM, HT+LT, + CCS (VPSA), 98 (lower bound)' (megajoule, CH, None)	CO2 transport and storage	0.00021002
('ILCD 2.0 2018 midpoint', 'climate change', 'climate change total')	'SMR BM, HT+LT, + CCS (VPSA), 98 (lower bound)' (megajoule, CH, None)	Direct CO2 emissions	0.0217564
('ILCD 2.0 2018 midpoint', 'climate change', 'climate change total')	'SMR BM, HT+LT, + CCS (VPSA), 98 (lower bound)' (megajoule, CH, None)	Emissions from fuel burning in furnace	3.00491e-05
('ILCD 2.0 2018 midpoint', 'climate change', 'climate change total')	'SMR NG/BM, HT+LT, 80:20 + CCS (MDEA), 98 (average), digestate incineration' (megajoule, CH, None)	Fuel supply chain	-0.00303015
('ILCD 2.0 2018 midpoint', 'climate change', 'climate change total')	'SMR NG/BM, HT+LT, 80:20 + CCS (MDEA), 98 (average), digestate incineration' (megajoule, CH, None)	Plant infrastructure	0.000631202
('ILCD 2.0 2018 midpoint', 'climate change', 'climate change total')	'SMR NG/BM, HT+LT, 80:20 + CCS (MDEA), 98 (average), digestate incineration' (megajoule, CH, None)	Water supply	2.27963e-05
('ILCD 2.0 2018 midpoint', 'climate change', 'climate change total')	'SMR NG/BM, HT+LT, 80:20 + CCS (MDEA), 98 (average), digestate incineration' (megajoule, CH, None)	Electricity from/to grid	0.00231544
('ILCD 2.0 2018 midpoint', 'climate change', 'climate change total')	'SMR NG/BM, HT+LT, 80:20 + CCS (MDEA), 98 (average), digestate incineration' (megajoule, CH, None)	Catalysts&adsorbents	9.63591e-05
('ILCD 2.0 2018 midpoint', 'climate change', 'climate change total')	'SMR NG/BM, HT+LT, 80:20 + CCS (MDEA), 98 (average), digestate incineration' (megajoule, CH, None)	CO2 transport and storage	0.000212166
('ILCD 2.0 2018 midpoint', 'climate change', 'climate change total')	'SMR NG/BM, HT+LT, 80:20 + CCS (MDEA), 98 (average), digestate incineration' (megajoule, CH, None)	Direct CO2 emissions	0.0217538
('ILCD 2.0 2018 midpoint', 'climate change', 'climate change total')	'SMR NG/BM, HT+LT, 80:20 + CCS (MDEA), 98 (average), digestate incineration' (megajoule, CH, None)	Emissions from fuel burning in furnace	2.49028e-05
('ILCD 2.0 2018 midpoint', 'climate change', 'climate change total')	'SMR NG/BM, HT+LT, 25:75 + CCS (MDEA), 98 (average), digestate incineration' (megajoule, CH, None)	Fuel supply chain	-0.0466962
('ILCD 2.0 2018 midpoint', 'climate change', 'climate change total')	'SMR NG/BM, HT+LT, 25:75 + CCS (MDEA), 98 (average), digestate incineration' (megajoule, CH, None)	Plant infrastructure	0.000631202
('ILCD 2.0 2018 midpoint', 'climate change', 'climate change total')	'SMR NG/BM, HT+LT, 25:75 + CCS (MDEA), 98 (average), digestate incineration' (megajoule, CH, None)	Water supply	2.27963e-05
('ILCD 2.0 2018 midpoint', 'climate change', 'climate change total')	'SMR NG/BM, HT+LT, 25:75 + CCS (MDEA), 98 (average), digestate incineration' (megajoule, CH, None)	Electricity from/to grid	0.00231544
('ILCD 2.0 2018 midpoint', 'climate change', 'climate change total')	'SMR NG/BM, HT+LT, 25:75 + CCS (MDEA), 98 (average), digestate incineration' (megajoule, CH, None)	Catalysts&adsorbents	9.63591e-05
('ILCD 2.0 2018 midpoint', 'climate change', 'climate change total')	'SMR NG/BM, HT+LT, 25:75 + CCS (MDEA), 98 (average), digestate incineration' (megajoule, CH, None)	CO2 transport and storage	0.000212166
('ILCD 2.0 2018 midpoint', 'climate change', 'climate change total')	'SMR NG/BM, HT+LT, 25:75 + CCS (MDEA), 98 (average), digestate incineration' (megajoule, CH, None)	Direct CO2 emissions	0.0217538
('ILCD 2.0 2018 midpoint', 'climate change', 'climate change total')	'SMR NG/BM, HT+LT, 25:75 + CCS (MDEA), 98 (average), digestate incineration' (megajoule, CH, None)	Emissions from fuel burning in furnace	2.49028e-05
('ILCD 2.0 2018 midpoint', 'climate change', 'climate change total')	'SMR NG, HT+LT, hydropower electricity' (megajoule, CH, None)	Fuel supply chain	0.0130703
('ILCD 2.0 2018 midpoint', 'climate change', 'climate change total')	'SMR NG, HT+LT, hydropower electricity' (megajoule, CH, None)	Plant infrastructure	0.00063127
('ILCD 2.0 2018 midpoint', 'climate change', 'climate change total')	'SMR NG, HT+LT, hydropower electricity' (megajoule, CH, None)	Water supply	2.2799e-05
('ILCD 2.0 2018 midpoint', 'climate change', 'climate change total')	'SMR NG, HT+LT, hydropower electricity' (megajoule, CH, None)	Electricity from/to grid	6.45572e-07
('ILCD 2.0 2018 midpoint', 'climate change', 'climate change total')	'SMR NG, HT+LT, hydropower electricity' (megajoule, CH, None)	Catalysts&adsorbents	9.12173e-05
('ILCD 2.0 2018 midpoint', 'climate change', 'climate change total')	'SMR NG, HT+LT, hydropower electricity' (megajoule, CH, None)	Direct CO2 emissions	0.0743524
('ILCD 2.0 2018 midpoint', 'climate change', 'climate change total')	'SMR NG, HT+LT, hydropower electricity' (megajoule, CH, None)	Emissions from fuel burning in furnace	2.72511e-05
('ILCD 2.0 2018 midpoint', 'climate change', 'climate change total')	'SMR NG, HT+LT, + CCS (MDEA), 90 (lower bound)' (megajoule, CH, None)	Fuel supply chain	0.0128601
('ILCD 2.0 2018 midpoint', 'climate change', 'climate change total')	'SMR NG, HT+LT, + CCS (MDEA), 90 (lower bound)' (megajoule, CH, None)	Plant infrastructure	0.000631202
('ILCD 2.0 2018 midpoint', 'climate change', 'climate change total')	'SMR NG, HT+LT, + CCS (MDEA), 90 (lower bound)' (megajoule, CH, None)	Water supply	2.27963e-05
('ILCD 2.0 2018 midpoint', 'climate change', 'climate change total')	'SMR NG, HT+LT, + CCS (MDEA), 90 (lower bound)' (megajoule, CH, None)	Electricity from/to grid	0.00165788
('ILCD 2.0 2018 midpoint', 'climate change', 'climate change total')	'SMR NG, HT+LT, + CCS (MDEA), 90 (lower bound)' (megajoule, CH, None)	Catalysts&adsorbents	9.5945e-05
('ILCD 2.0 2018 midpoint', 'climate change', 'climate change total')	'SMR NG, HT+LT, + CCS (MDEA), 90 (lower bound)' (megajoule, CH, None)	CO2 transport and storage	0.000195079
('ILCD 2.0 2018 midpoint', 'climate change', 'climate change total')	'SMR NG, HT+LT, + CCS (MDEA), 90 (lower bound)' (megajoule, CH, None)	Direct CO2 emissions	0.025994
('ILCD 2.0 2018 midpoint', 'climate change', 'climate change total')	'SMR NG, HT+LT, + CCS (MDEA), 90 (lower bound)' (megajoule, CH, None)	Emissions from fuel burning in furnace	2.50276e-05
('ILCD 2.0 2018 midpoint', 'climate change', 'climate change total')	'SMR NG/BM, HT+LT, 10:90 + CCS (MDEA), 98 (average)' (megajoule, CH, None)	Fuel supply chain	-0.0896137
('ILCD 2.0 2018 midpoint', 'climate change', 'climate change total')	'SMR NG/BM, HT+LT, 10:90 + CCS (MDEA), 98 (average)' (megajoule, CH, None)	Plant infrastructure	0.000631202
('ILCD 2.0 2018 midpoint', 'climate change', 'climate change total')	'SMR NG/BM, HT+LT, 10:90 + CCS (MDEA), 98 (average)' (megajoule, CH, None)	Water supply	2.27963e-05
('ILCD 2.0 2018 midpoint', 'climate change', 'climate change total')	'SMR NG/BM, HT+LT, 10:90 + CCS (MDEA), 98 (average)' (megajoule, CH, None)	Electricity from/to grid	0.00231544
('ILCD 2.0 2018 midpoint', 'climate change', 'climate change total')	'SMR NG/BM, HT+LT, 10:90 + CCS (MDEA), 98 (average)' (megajoule, CH, None)	Catalysts&adsorbents	9.63591e-05
('ILCD 2.0 2018 midpoint', 'climate change', 'climate change total')	'SMR NG/BM, HT+LT, 10:90 + CCS (MDEA), 98 (average)' (megajoule, CH, None)	CO2 transport and storage	0.000212166
('ILCD 2.0 2018 midpoint', 'climate change', 'climate change total')	'SMR NG/BM, HT+LT, 10:90 + CCS (MDEA), 98 (average)' (megajoule, CH, None)	Direct CO2 emissions	0.0217538
('ILCD 2.0 2018 midpoint', 'climate change', 'climate change total')	'SMR NG/BM, HT+LT, 10:90 + CCS (MDEA), 98 (average)' (megajoule, CH, None)	Emissions from fuel burning in furnace	2.49028e-05
('ILCD 2.0 2018 midpoint', 'ecosystem quality', 'freshwater and terrestrial acidification')	'ATR BM, HT+LT, + CCS (VPSA), 98 (average), maximum C uptake' (megajoule, CH, None)	Fuel supply chain	0.000103155
('ILCD 2.0 2018 midpoint', 'ecosystem quality', 'freshwater and terrestrial acidification')	'ATR BM, HT+LT, + CCS (VPSA), 98 (average), maximum C uptake' (megajoule, CH, None)	Plant infrastructure	7.89889e-06
('ILCD 2.0 2018 midpoint', 'ecosystem quality', 'freshwater and terrestrial acidification')	'ATR BM, HT+LT, + CCS (VPSA), 98 (average), maximum C uptake' (megajoule, CH, None)	Electricity from/to grid	2.72611e-05
('ILCD 2.0 2018 midpoint', 'ecosystem quality', 'freshwater and terrestrial acidification')	'ATR BM, HT+LT, + CCS (VPSA), 98 (average), maximum C uptake' (megajoule, CH, None)	Water supply	2.47424e-07
('ILCD 2.0 2018 midpoint', 'ecosystem quality', 'freshwater and terrestrial acidification')	'ATR BM, HT+LT, + CCS (VPSA), 98 (average), maximum C uptake' (megajoule, CH, None)	Catalysts&adsorbents	7.85337e-06
('ILCD 2.0 2018 midpoint', 'ecosystem quality', 'freshwater and terrestrial acidification')	'ATR BM, HT+LT, + CCS (VPSA), 98 (average), maximum C uptake' (megajoule, CH, None)	CO2 transport and storage	1.6434e-06
('ILCD 2.0 2018 midpoint', 'ecosystem quality', 'freshwater and terrestrial acidification')	'ATR BM, HT+LT, + CCS (VPSA), 98 (average), maximum C uptake' (megajoule, CH, None)	Direct CO2 emissions	0
('ILCD 2.0 2018 midpoint', 'ecosystem quality', 'freshwater and terrestrial acidification')	'ATR BM, HT+LT, + CCS (VPSA), 98 (average), maximum C uptake' (megajoule, CH, None)	Emissions from fuel burning in furnace	1.8498e-05
('ILCD 2.0 2018 midpoint', 'ecosystem quality', 'freshwater and terrestrial acidification')	'ATR BM, HT+LT, + CCS (MDEA), 98 (upper bound)' (megajoule, CH, None)	Fuel supply chain	0.000102648
('ILCD 2.0 2018 midpoint', 'ecosystem quality', 'freshwater and terrestrial acidification')	'ATR BM, HT+LT, + CCS (MDEA), 98 (upper bound)' (megajoule, CH, None)	Plant infrastructure	7.89891e-06
('ILCD 2.0 2018 midpoint', 'ecosystem quality', 'freshwater and terrestrial acidification')	'ATR BM, HT+LT, + CCS (MDEA), 98 (upper bound)' (megajoule, CH, None)	Electricity from/to grid	1.91737e-05
('ILCD 2.0 2018 midpoint', 'ecosystem quality', 'freshwater and terrestrial acidification')	'ATR BM, HT+LT, + CCS (MDEA), 98 (upper bound)' (megajoule, CH, None)	Water supply	2.47425e-07
('ILCD 2.0 2018 midpoint', 'ecosystem quality', 'freshwater and terrestrial acidification')	'ATR BM, HT+LT, + CCS (MDEA), 98 (upper bound)' (megajoule, CH, None)	Catalysts&adsorbents	7.88374e-06
('ILCD 2.0 2018 midpoint', 'ecosystem quality', 'freshwater and terrestrial acidification')	'ATR BM, HT+LT, + CCS (MDEA), 98 (upper bound)' (megajoule, CH, None)	CO2 transport and storage	1.60359e-06
('ILCD 2.0 2018 midpoint', 'ecosystem quality', 'freshwater and terrestrial acidification')	'ATR BM, HT+LT, + CCS (MDEA), 98 (upper bound)' (megajoule, CH, None)	Direct CO2 emissions	0
('ILCD 2.0 2018 midpoint', 'ecosystem quality', 'freshwater and terrestrial acidification')	'ATR BM, HT+LT, + CCS (MDEA), 98 (upper bound)' (megajoule, CH, None)	Emissions from fuel burning in furnace	1.8498e-05
('ILCD 2.0 2018 midpoint', 'ecosystem quality', 'freshwater and terrestrial acidification')	'ATR BM, HT+LT, + CCS (MDEA), 90 (lower bound)' (megajoule, CH, None)	Fuel supply chain	0.000102648
('ILCD 2.0 2018 midpoint', 'ecosystem quality', 'freshwater and terrestrial acidification')	'ATR BM, HT+LT, + CCS (MDEA), 90 (lower bound)' (megajoule, CH, None)	Plant infrastructure	7.89891e-06
('ILCD 2.0 2018 midpoint', 'ecosystem quality', 'freshwater and terrestrial acidification')	'ATR BM, HT+LT, + CCS (MDEA), 90 (lower bound)' (megajoule, CH, None)	Electricity from/to grid	1.77354e-05
('ILCD 2.0 2018 midpoint', 'ecosystem quality', 'freshwater and terrestrial acidification')	'ATR BM, HT+LT, + CCS (MDEA), 90 (lower bound)' (megajoule, CH, None)	Water supply	2.47425e-07
('ILCD 2.0 2018 midpoint', 'ecosystem quality', 'freshwater and terrestrial acidification')	'ATR BM, HT+LT, + CCS (MDEA), 90 (lower bound)' (megajoule, CH, None)	Catalysts&adsorbents	7.88126e-06
('ILCD 2.0 2018 midpoint', 'ecosystem quality', 'freshwater and terrestrial acidification')	'ATR BM, HT+LT, + CCS (MDEA), 90 (lower bound)' (megajoule, CH, None)	CO2 transport and storage	1.47269e-06
('ILCD 2.0 2018 midpoint', 'ecosystem quality', 'freshwater and terrestrial acidification')	'ATR BM, HT+LT, + CCS (MDEA), 90 (lower bound)' (megajoule, CH, None)	Direct CO2 emissions	0
('ILCD 2.0 2018 midpoint', 'ecosystem quality', 'freshwater and terrestrial acidification')	'ATR BM, HT+LT, + CCS (MDEA), 90 (lower bound)' (megajoule, CH, None)	Emissions from fuel burning in furnace	1.8498e-05
('ILCD 2.0 2018 midpoint', 'ecosystem quality', 'freshwater and terrestrial acidification')	'ATR NG, HT+LT, + CCS (MDEA), 98 (average), 25 bar' (megajoule, CH, None)	Fuel supply chain	4.84862e-05
('ILCD 2.0 2018 midpoint', 'ecosystem quality', 'freshwater and terrestrial acidification')	'ATR NG, HT+LT, + CCS (MDEA), 98 (average), 25 bar' (megajoule, CH, None)	Plant infrastructure	7.89943e-06
('ILCD 2.0 2018 midpoint', 'ecosystem quality', 'freshwater and terrestrial acidification')	'ATR NG, HT+LT, + CCS (MDEA), 98 (average), 25 bar' (megajoule, CH, None)	Electricity from/to grid	-1.77679e-06
('ILCD 2.0 2018 midpoint', 'ecosystem quality', 'freshwater and terrestrial acidification')	'ATR NG, HT+LT, + CCS (MDEA), 98 (average), 25 bar' (megajoule, CH, None)	Water supply	2.47441e-07
('ILCD 2.0 2018 midpoint', 'ecosystem quality', 'freshwater and terrestrial acidification')	'ATR NG, HT+LT, + CCS (MDEA), 98 (average), 25 bar' (megajoule, CH, None)	Catalysts&adsorbents	7.88384e-06
('ILCD 2.0 2018 midpoint', 'ecosystem quality', 'freshwater and terrestrial acidification')	'ATR NG, HT+LT, + CCS (MDEA), 98 (average), 25 bar' (megajoule, CH, None)	CO2 transport and storage	1.60863e-06
('ILCD 2.0 2018 midpoint', 'ecosystem quality', 'freshwater and terrestrial acidification')	'ATR NG, HT+LT, + CCS (MDEA), 98 (average), 25 bar' (megajoule, CH, None)	Direct CO2 emissions	0
('ILCD 2.0 2018 midpoint', 'ecosystem quality', 'freshwater and terrestrial acidification')	'ATR NG, HT+LT, + CCS (MDEA), 98 (average), 25 bar' (megajoule, CH, None)	Emissions from fuel burning in furnace	1.8498e-05
('ILCD 2.0 2018 midpoint', 'ecosystem quality', 'freshwater and terrestrial acidification')	'ATR BM, HT+LT, +CCS (VPSA), 98 (average), hydropower electricity' (megajoule, CH, None)	Fuel supply chain	0.000103155
('ILCD 2.0 2018 midpoint', 'ecosystem quality', 'freshwater and terrestrial acidification')	'ATR BM, HT+LT, +CCS (VPSA), 98 (average), hydropower electricity' (megajoule, CH, None)	Plant infrastructure	7.89889e-06
('ILCD 2.0 2018 midpoint', 'ecosystem quality', 'freshwater and terrestrial acidification')	'ATR BM, HT+LT, +CCS (VPSA), 98 (average), hydropower electricity' (megajoule, CH, None)	Electricity from/to grid	3.18392e-07
('ILCD 2.0 2018 midpoint', 'ecosystem quality', 'freshwater and terrestrial acidification')	'ATR BM, HT+LT, +CCS (VPSA), 98 (average), hydropower electricity' (megajoule, CH, None)	Water supply	2.47424e-07
('ILCD 2.0 2018 midpoint', 'ecosystem quality', 'freshwater and terrestrial acidification')	'ATR BM, HT+LT, +CCS (VPSA), 98 (average), hydropower electricity' (megajoule, CH, None)	Catalysts&adsorbents	7.85337e-06
('ILCD 2.0 2018 midpoint', 'ecosystem quality', 'freshwater and terrestrial acidification')	'ATR BM, HT+LT, +CCS (VPSA), 98 (average), hydropower electricity' (megajoule, CH, None)	CO2 transport and storage	1.6434e-06
('ILCD 2.0 2018 midpoint', 'ecosystem quality', 'freshwater and terrestrial acidification')	'ATR BM, HT+LT, +CCS (VPSA), 98 (average), hydropower electricity' (megajoule, CH, None)	Direct CO2 emissions	0
('ILCD 2.0 2018 midpoint', 'ecosystem quality', 'freshwater and terrestrial acidification')	'ATR BM, HT+LT, +CCS (VPSA), 98 (average), hydropower electricity' (megajoule, CH, None)	Emissions from fuel burning in furnace	1.8498e-05
('ILCD 2.0 2018 midpoint', 'ecosystem quality', 'freshwater and terrestrial acidification')	'ATR BM, HT+LT, + CCS (VPSA), 98 (average), digestate incineration' (megajoule, CH, None)	Fuel supply chain	0.000103155
('ILCD 2.0 2018 midpoint', 'ecosystem quality', 'freshwater and terrestrial acidification')	'ATR BM, HT+LT, + CCS (VPSA), 98 (average), digestate incineration' (megajoule, CH, None)	Plant infrastructure	7.89889e-06
('ILCD 2.0 2018 midpoint', 'ecosystem quality', 'freshwater and terrestrial acidification')	'ATR BM, HT+LT, + CCS (VPSA), 98 (average), digestate incineration' (megajoule, CH, None)	Electricity from/to grid	2.72611e-05
('ILCD 2.0 2018 midpoint', 'ecosystem quality', 'freshwater and terrestrial acidification')	'ATR BM, HT+LT, + CCS (VPSA), 98 (average), digestate incineration' (megajoule, CH, None)	Water supply	2.47424e-07
('ILCD 2.0 2018 midpoint', 'ecosystem quality', 'freshwater and terrestrial acidification')	'ATR BM, HT+LT, + CCS (VPSA), 98 (average), digestate incineration' (megajoule, CH, None)	Catalysts&adsorbents	7.85337e-06
('ILCD 2.0 2018 midpoint', 'ecosystem quality', 'freshwater and terrestrial acidification')	'ATR BM, HT+LT, + CCS (VPSA), 98 (average), digestate incineration' (megajoule, CH, None)	CO2 transport and storage	1.6434e-06
('ILCD 2.0 2018 midpoint', 'ecosystem quality', 'freshwater and terrestrial acidification')	'ATR BM, HT+LT, + CCS (VPSA), 98 (average), digestate incineration' (megajoule, CH, None)	Direct CO2 emissions	0
('ILCD 2.0 2018 midpoint', 'ecosystem quality', 'freshwater and terrestrial acidification')	'ATR BM, HT+LT, + CCS (VPSA), 98 (average), digestate incineration' (megajoule, CH, None)	Emissions from fuel burning in furnace	1.8498e-05
('ILCD 2.0 2018 midpoint', 'ecosystem quality', 'freshwater and terrestrial acidification')	'ATR NG, HT+LT, +CCS (VPSA), 98 (average), hydropower electricity' (megajoule, CH, None)	Fuel supply chain	4.87219e-05
('ILCD 2.0 2018 midpoint', 'ecosystem quality', 'freshwater and terrestrial acidification')	'ATR NG, HT+LT, +CCS (VPSA), 98 (average), hydropower electricity' (megajoule, CH, None)	Plant infrastructure	7.89906e-06
('ILCD 2.0 2018 midpoint', 'ecosystem quality', 'freshwater and terrestrial acidification')	'ATR NG, HT+LT, +CCS (VPSA), 98 (average), hydropower electricity' (megajoule, CH, None)	Electricity from/to grid	3.32074e-07
('ILCD 2.0 2018 midpoint', 'ecosystem quality', 'freshwater and terrestrial acidification')	'ATR NG, HT+LT, +CCS (VPSA), 98 (average), hydropower electricity' (megajoule, CH, None)	Water supply	2.47429e-07
('ILCD 2.0 2018 midpoint', 'ecosystem quality', 'freshwater and terrestrial acidification')	'ATR NG, HT+LT, +CCS (VPSA), 98 (average), hydropower electricity' (megajoule, CH, None)	Catalysts&adsorbents	7.85337e-06
('ILCD 2.0 2018 midpoint', 'ecosystem quality', 'freshwater and terrestrial acidification')	'ATR NG, HT+LT, +CCS (VPSA), 98 (average), hydropower electricity' (megajoule, CH, None)	CO2 transport and storage	1.6488e-06
('ILCD 2.0 2018 midpoint', 'ecosystem quality', 'freshwater and terrestrial acidification')	'ATR NG, HT+LT, +CCS (VPSA), 98 (average), hydropower electricity' (megajoule, CH, None)	Direct CO2 emissions	0
('ILCD 2.0 2018 midpoint', 'ecosystem quality', 'freshwater and terrestrial acidification')	'ATR NG, HT+LT, +CCS (VPSA), 98 (average), hydropower electricity' (megajoule, CH, None)	Emissions from fuel burning in furnace	1.8498e-05
('ILCD 2.0 2018 midpoint', 'ecosystem quality', 'freshwater and terrestrial acidification')	'ATR NG, HT+LT, + CCS (MDEA), 90 (lower bound)' (megajoule, CH, None)	Fuel supply chain	4.84861e-05
('ILCD 2.0 2018 midpoint', 'ecosystem quality', 'freshwater and terrestrial acidification')	'ATR NG, HT+LT, + CCS (MDEA), 90 (lower bound)' (megajoule, CH, None)	Plant infrastructure	7.89941e-06
('ILCD 2.0 2018 midpoint', 'ecosystem quality', 'freshwater and terrestrial acidification')	'ATR NG, HT+LT, + CCS (MDEA), 90 (lower bound)' (megajoule, CH, None)	Electricity from/to grid	1.86835e-05
('ILCD 2.0 2018 midpoint', 'ecosystem quality', 'freshwater and terrestrial acidification')	'ATR NG, HT+LT, + CCS (MDEA), 90 (lower bound)' (megajoule, CH, None)	Water supply	2.47441e-07
('ILCD 2.0 2018 midpoint', 'ecosystem quality', 'freshwater and terrestrial acidification')	'ATR NG, HT+LT, + CCS (MDEA), 90 (lower bound)' (megajoule, CH, None)	Catalysts&adsorbents	7.88135e-06
('ILCD 2.0 2018 midpoint', 'ecosystem quality', 'freshwater and terrestrial acidification')	'ATR NG, HT+LT, + CCS (MDEA), 90 (lower bound)' (megajoule, CH, None)	CO2 transport and storage	1.47731e-06
('ILCD 2.0 2018 midpoint', 'ecosystem quality', 'freshwater and terrestrial acidification')	'ATR NG, HT+LT, + CCS (MDEA), 90 (lower bound)' (megajoule, CH, None)	Direct CO2 emissions	0
('ILCD 2.0 2018 midpoint', 'ecosystem quality', 'freshwater and terrestrial acidification')	'ATR NG, HT+LT, + CCS (MDEA), 90 (lower bound)' (megajoule, CH, None)	Emissions from fuel burning in furnace	1.8498e-05
('ILCD 2.0 2018 midpoint', 'ecosystem quality', 'freshwater and terrestrial acidification')	'ATR NG, HT+LT, 25 bar' (megajoule, CH, None)	Fuel supply chain	4.84861e-05
('ILCD 2.0 2018 midpoint', 'ecosystem quality', 'freshwater and terrestrial acidification')	'ATR NG, HT+LT, 25 bar' (megajoule, CH, None)	Plant infrastructure	7.89941e-06
('ILCD 2.0 2018 midpoint', 'ecosystem quality', 'freshwater and terrestrial acidification')	'ATR NG, HT+LT, 25 bar' (megajoule, CH, None)	Electricity from/to grid	-1.08475e-05
('ILCD 2.0 2018 midpoint', 'ecosystem quality', 'freshwater and terrestrial acidification')	'ATR NG, HT+LT, 25 bar' (megajoule, CH, None)	Water supply	2.47441e-07
('ILCD 2.0 2018 midpoint', 'ecosystem quality', 'freshwater and terrestrial acidification')	'ATR NG, HT+LT, 25 bar' (megajoule, CH, None)	Catalysts&adsorbents	7.85337e-06
('ILCD 2.0 2018 midpoint', 'ecosystem quality', 'freshwater and terrestrial acidification')	'ATR NG, HT+LT, 25 bar' (megajoule, CH, None)	Direct CO2 emissions	0
('ILCD 2.0 2018 midpoint', 'ecosystem quality', 'freshwater and terrestrial acidification')	'ATR NG, HT+LT, 25 bar' (megajoule, CH, None)	Emissions from fuel burning in furnace	1.8498e-05
('ILCD 2.0 2018 midpoint', 'ecosystem quality', 'freshwater and terrestrial acidification')	'ATR BM, HT+LT, + CCS (MDEA), 90 (upper bound)' (megajoule, CH, None)	Fuel supply chain	0.000102648
('ILCD 2.0 2018 midpoint', 'ecosystem quality', 'freshwater and terrestrial acidification')	'ATR BM, HT+LT, + CCS (MDEA), 90 (upper bound)' (megajoule, CH, None)	Plant infrastructure	7.89891e-06
('ILCD 2.0 2018 midpoint', 'ecosystem quality', 'freshwater and terrestrial acidification')	'ATR BM, HT+LT, + CCS (MDEA), 90 (upper bound)' (megajoule, CH, None)	Electricity from/to grid	1.78057e-05
('ILCD 2.0 2018 midpoint', 'ecosystem quality', 'freshwater and terrestrial acidification')	'ATR BM, HT+LT, + CCS (MDEA), 90 (upper bound)' (megajoule, CH, None)	Water supply	2.47425e-07
('ILCD 2.0 2018 midpoint', 'ecosystem quality', 'freshwater and terrestrial acidification')	'ATR BM, HT+LT, + CCS (MDEA), 90 (upper bound)' (megajoule, CH, None)	Catalysts&adsorbents	7.88126e-06
('ILCD 2.0 2018 midpoint', 'ecosystem quality', 'freshwater and terrestrial acidification')	'ATR BM, HT+LT, + CCS (MDEA), 90 (upper bound)' (megajoule, CH, None)	CO2 transport and storage	1.47269e-06
('ILCD 2.0 2018 midpoint', 'ecosystem quality', 'freshwater and terrestrial acidification')	'ATR BM, HT+LT, + CCS (MDEA), 90 (upper bound)' (megajoule, CH, None)	Direct CO2 emissions	0
('ILCD 2.0 2018 midpoint', 'ecosystem quality', 'freshwater and terrestrial acidification')	'ATR BM, HT+LT, + CCS (MDEA), 90 (upper bound)' (megajoule, CH, None)	Emissions from fuel burning in furnace	1.8498e-05
('ILCD 2.0 2018 midpoint', 'ecosystem quality', 'freshwater and terrestrial acidification')	'ATR BM, HT+LT, with digestate incineration' (megajoule, CH, None)	Fuel supply chain	0.000102647
('ILCD 2.0 2018 midpoint', 'ecosystem quality', 'freshwater and terrestrial acidification')	'ATR BM, HT+LT, with digestate incineration' (megajoule, CH, None)	Plant infrastructure	7.89893e-06
('ILCD 2.0 2018 midpoint', 'ecosystem quality', 'freshwater and terrestrial acidification')	'ATR BM, HT+LT, with digestate incineration' (megajoule, CH, None)	Electricity from/to grid	1.00326e-05
('ILCD 2.0 2018 midpoint', 'ecosystem quality', 'freshwater and terrestrial acidification')	'ATR BM, HT+LT, with digestate incineration' (megajoule, CH, None)	Water supply	2.47425e-07
('ILCD 2.0 2018 midpoint', 'ecosystem quality', 'freshwater and terrestrial acidification')	'ATR BM, HT+LT, with digestate incineration' (megajoule, CH, None)	Catalysts&adsorbents	7.85337e-06
('ILCD 2.0 2018 midpoint', 'ecosystem quality', 'freshwater and terrestrial acidification')	'ATR BM, HT+LT, with digestate incineration' (megajoule, CH, None)	Direct CO2 emissions	0
('ILCD 2.0 2018 midpoint', 'ecosystem quality', 'freshwater and terrestrial acidification')	'ATR BM, HT+LT, with digestate incineration' (megajoule, CH, None)	Emissions from fuel burning in furnace	1.8498e-05
('ILCD 2.0 2018 midpoint', 'ecosystem quality', 'freshwater and terrestrial acidification')	'ATR BM, HT+LT, cut-off approach' (megajoule, CH, None)	Fuel supply chain	0.000102648
('ILCD 2.0 2018 midpoint', 'ecosystem quality', 'freshwater and terrestrial acidification')	'ATR BM, HT+LT, cut-off approach' (megajoule, CH, None)	Plant infrastructure	7.89891e-06
('ILCD 2.0 2018 midpoint', 'ecosystem quality', 'freshwater and terrestrial acidification')	'ATR BM, HT+LT, cut-off approach' (megajoule, CH, None)	Electricity from/to grid	1.77705e-05
('ILCD 2.0 2018 midpoint', 'ecosystem quality', 'freshwater and terrestrial acidification')	'ATR BM, HT+LT, cut-off approach' (megajoule, CH, None)	Water supply	2.47425e-07
('ILCD 2.0 2018 midpoint', 'ecosystem quality', 'freshwater and terrestrial acidification')	'ATR BM, HT+LT, cut-off approach' (megajoule, CH, None)	Catalysts&adsorbents	7.85337e-06
('ILCD 2.0 2018 midpoint', 'ecosystem quality', 'freshwater and terrestrial acidification')	'ATR BM, HT+LT, cut-off approach' (megajoule, CH, None)	CO2 transport and storage	1.47269e-06
('ILCD 2.0 2018 midpoint', 'ecosystem quality', 'freshwater and terrestrial acidification')	'ATR BM, HT+LT, cut-off approach' (megajoule, CH, None)	Direct CO2 emissions	0
('ILCD 2.0 2018 midpoint', 'ecosystem quality', 'freshwater and terrestrial acidification')	'ATR BM, HT+LT, cut-off approach' (megajoule, CH, None)	Emissions from fuel burning in furnace	1.8498e-05
('ILCD 2.0 2018 midpoint', 'ecosystem quality', 'freshwater and terrestrial acidification')	'ATR BM, HT+LT, maximum C uptake' (megajoule, CH, None)	Fuel supply chain	0.000102647
('ILCD 2.0 2018 midpoint', 'ecosystem quality', 'freshwater and terrestrial acidification')	'ATR BM, HT+LT, maximum C uptake' (megajoule, CH, None)	Plant infrastructure	7.89893e-06
('ILCD 2.0 2018 midpoint', 'ecosystem quality', 'freshwater and terrestrial acidification')	'ATR BM, HT+LT, maximum C uptake' (megajoule, CH, None)	Electricity from/to grid	1.00326e-05
('ILCD 2.0 2018 midpoint', 'ecosystem quality', 'freshwater and terrestrial acidification')	'ATR BM, HT+LT, maximum C uptake' (megajoule, CH, None)	Water supply	2.47425e-07
('ILCD 2.0 2018 midpoint', 'ecosystem quality', 'freshwater and terrestrial acidification')	'ATR BM, HT+LT, maximum C uptake' (megajoule, CH, None)	Catalysts&adsorbents	7.85337e-06
('ILCD 2.0 2018 midpoint', 'ecosystem quality', 'freshwater and terrestrial acidification')	'ATR BM, HT+LT, maximum C uptake' (megajoule, CH, None)	Direct CO2 emissions	0
('ILCD 2.0 2018 midpoint', 'ecosystem quality', 'freshwater and terrestrial acidification')	'ATR BM, HT+LT, maximum C uptake' (megajoule, CH, None)	Emissions from fuel burning in furnace	1.8498e-05
('ILCD 2.0 2018 midpoint', 'ecosystem quality', 'freshwater and terrestrial acidification')	'ATR NG, HT+LT, + CCS (MDEA), 98 (lower bound)' (megajoule, CH, None)	Fuel supply chain	4.84861e-05
('ILCD 2.0 2018 midpoint', 'ecosystem quality', 'freshwater and terrestrial acidification')	'ATR NG, HT+LT, + CCS (MDEA), 98 (lower bound)' (megajoule, CH, None)	Plant infrastructure	7.89941e-06
('ILCD 2.0 2018 midpoint', 'ecosystem quality', 'freshwater and terrestrial acidification')	'ATR NG, HT+LT, + CCS (MDEA), 98 (lower bound)' (megajoule, CH, None)	Electricity from/to grid	1.99582e-05
('ILCD 2.0 2018 midpoint', 'ecosystem quality', 'freshwater and terrestrial acidification')	'ATR NG, HT+LT, + CCS (MDEA), 98 (lower bound)' (megajoule, CH, None)	Water supply	2.47441e-07
('ILCD 2.0 2018 midpoint', 'ecosystem quality', 'freshwater and terrestrial acidification')	'ATR NG, HT+LT, + CCS (MDEA), 98 (lower bound)' (megajoule, CH, None)	Catalysts&adsorbents	7.88384e-06
('ILCD 2.0 2018 midpoint', 'ecosystem quality', 'freshwater and terrestrial acidification')	'ATR NG, HT+LT, + CCS (MDEA), 98 (lower bound)' (megajoule, CH, None)	CO2 transport and storage	1.60863e-06
('ILCD 2.0 2018 midpoint', 'ecosystem quality', 'freshwater and terrestrial acidification')	'ATR NG, HT+LT, + CCS (MDEA), 98 (lower bound)' (megajoule, CH, None)	Direct CO2 emissions	0
('ILCD 2.0 2018 midpoint', 'ecosystem quality', 'freshwater and terrestrial acidification')	'ATR NG, HT+LT, + CCS (MDEA), 98 (lower bound)' (megajoule, CH, None)	Emissions from fuel burning in furnace	1.8498e-05
('ILCD 2.0 2018 midpoint', 'ecosystem quality', 'freshwater and terrestrial acidification')	'ATR BM, HT+LT, + CCS (VPSA), 98 (lower bound)' (megajoule, CH, None)	Fuel supply chain	0.000102688
('ILCD 2.0 2018 midpoint', 'ecosystem quality', 'freshwater and terrestrial acidification')	'ATR BM, HT+LT, + CCS (VPSA), 98 (lower bound)' (megajoule, CH, None)	Plant infrastructure	7.89893e-06
('ILCD 2.0 2018 midpoint', 'ecosystem quality', 'freshwater and terrestrial acidification')	'ATR BM, HT+LT, + CCS (VPSA), 98 (lower bound)' (megajoule, CH, None)	Electricity from/to grid	2.64087e-05
('ILCD 2.0 2018 midpoint', 'ecosystem quality', 'freshwater and terrestrial acidification')	'ATR BM, HT+LT, + CCS (VPSA), 98 (lower bound)' (megajoule, CH, None)	Water supply	2.47425e-07
('ILCD 2.0 2018 midpoint', 'ecosystem quality', 'freshwater and terrestrial acidification')	'ATR BM, HT+LT, + CCS (VPSA), 98 (lower bound)' (megajoule, CH, None)	Catalysts&adsorbents	7.85337e-06
('ILCD 2.0 2018 midpoint', 'ecosystem quality', 'freshwater and terrestrial acidification')	'ATR BM, HT+LT, + CCS (VPSA), 98 (lower bound)' (megajoule, CH, None)	CO2 transport and storage	1.63589e-06
('ILCD 2.0 2018 midpoint', 'ecosystem quality', 'freshwater and terrestrial acidification')	'ATR BM, HT+LT, + CCS (VPSA), 98 (lower bound)' (megajoule, CH, None)	Direct CO2 emissions	0
('ILCD 2.0 2018 midpoint', 'ecosystem quality', 'freshwater and terrestrial acidification')	'ATR BM, HT+LT, + CCS (VPSA), 98 (lower bound)' (megajoule, CH, None)	Emissions from fuel burning in furnace	1.8498e-05
('ILCD 2.0 2018 midpoint', 'ecosystem quality', 'freshwater and terrestrial acidification')	'ATR BM, HT+LT, + CCS (VPSA), 98 (upper bound)' (megajoule, CH, None)	Fuel supply chain	0.000103623
('ILCD 2.0 2018 midpoint', 'ecosystem quality', 'freshwater and terrestrial acidification')	'ATR BM, HT+LT, + CCS (VPSA), 98 (upper bound)' (megajoule, CH, None)	Plant infrastructure	7.89884e-06
('ILCD 2.0 2018 midpoint', 'ecosystem quality', 'freshwater and terrestrial acidification')	'ATR BM, HT+LT, + CCS (VPSA), 98 (upper bound)' (megajoule, CH, None)	Electricity from/to grid	2.81135e-05
('ILCD 2.0 2018 midpoint', 'ecosystem quality', 'freshwater and terrestrial acidification')	'ATR BM, HT+LT, + CCS (VPSA), 98 (upper bound)' (megajoule, CH, None)	Water supply	2.47422e-07
('ILCD 2.0 2018 midpoint', 'ecosystem quality', 'freshwater and terrestrial acidification')	'ATR BM, HT+LT, + CCS (VPSA), 98 (upper bound)' (megajoule, CH, None)	Catalysts&adsorbents	7.85337e-06
('ILCD 2.0 2018 midpoint', 'ecosystem quality', 'freshwater and terrestrial acidification')	'ATR BM, HT+LT, + CCS (VPSA), 98 (upper bound)' (megajoule, CH, None)	CO2 transport and storage	1.65092e-06
('ILCD 2.0 2018 midpoint', 'ecosystem quality', 'freshwater and terrestrial acidification')	'ATR BM, HT+LT, + CCS (VPSA), 98 (upper bound)' (megajoule, CH, None)	Direct CO2 emissions	0
('ILCD 2.0 2018 midpoint', 'ecosystem quality', 'freshwater and terrestrial acidification')	'ATR BM, HT+LT, + CCS (VPSA), 98 (upper bound)' (megajoule, CH, None)	Emissions from fuel burning in furnace	1.8498e-05
('ILCD 2.0 2018 midpoint', 'ecosystem quality', 'freshwater and terrestrial acidification')	'ATR BM, HT+LT, + CCS (MDEA), 98 (lower bound)' (megajoule, CH, None)	Fuel supply chain	0.000102648
('ILCD 2.0 2018 midpoint', 'ecosystem quality', 'freshwater and terrestrial acidification')	'ATR BM, HT+LT, + CCS (MDEA), 98 (lower bound)' (megajoule, CH, None)	Plant infrastructure	7.89891e-06
('ILCD 2.0 2018 midpoint', 'ecosystem quality', 'freshwater and terrestrial acidification')	'ATR BM, HT+LT, + CCS (MDEA), 98 (lower bound)' (megajoule, CH, None)	Electricity from/to grid	1.90336e-05
('ILCD 2.0 2018 midpoint', 'ecosystem quality', 'freshwater and terrestrial acidification')	'ATR BM, HT+LT, + CCS (MDEA), 98 (lower bound)' (megajoule, CH, None)	Water supply	2.47425e-07
('ILCD 2.0 2018 midpoint', 'ecosystem quality', 'freshwater and terrestrial acidification')	'ATR BM, HT+LT, + CCS (MDEA), 98 (lower bound)' (megajoule, CH, None)	Catalysts&adsorbents	7.88374e-06
('ILCD 2.0 2018 midpoint', 'ecosystem quality', 'freshwater and terrestrial acidification')	'ATR BM, HT+LT, + CCS (MDEA), 98 (lower bound)' (megajoule, CH, None)	CO2 transport and storage	1.60359e-06
('ILCD 2.0 2018 midpoint', 'ecosystem quality', 'freshwater and terrestrial acidification')	'ATR BM, HT+LT, + CCS (MDEA), 98 (lower bound)' (megajoule, CH, None)	Direct CO2 emissions	0
('ILCD 2.0 2018 midpoint', 'ecosystem quality', 'freshwater and terrestrial acidification')	'ATR BM, HT+LT, + CCS (MDEA), 98 (lower bound)' (megajoule, CH, None)	Emissions from fuel burning in furnace	1.8498e-05
('ILCD 2.0 2018 midpoint', 'ecosystem quality', 'freshwater and terrestrial acidification')	'ATR BM, HT+LT, + CCS (MDEA), 98 (average), digestate incineration' (megajoule, CH, None)	Fuel supply chain	0.000102648
('ILCD 2.0 2018 midpoint', 'ecosystem quality', 'freshwater and terrestrial acidification')	'ATR BM, HT+LT, + CCS (MDEA), 98 (average), digestate incineration' (megajoule, CH, None)	Plant infrastructure	7.89891e-06
('ILCD 2.0 2018 midpoint', 'ecosystem quality', 'freshwater and terrestrial acidification')	'ATR BM, HT+LT, + CCS (MDEA), 98 (average), digestate incineration' (megajoule, CH, None)	Electricity from/to grid	1.91036e-05
('ILCD 2.0 2018 midpoint', 'ecosystem quality', 'freshwater and terrestrial acidification')	'ATR BM, HT+LT, + CCS (MDEA), 98 (average), digestate incineration' (megajoule, CH, None)	Water supply	2.47425e-07
('ILCD 2.0 2018 midpoint', 'ecosystem quality', 'freshwater and terrestrial acidification')	'ATR BM, HT+LT, + CCS (MDEA), 98 (average), digestate incineration' (megajoule, CH, None)	Catalysts&adsorbents	7.85337e-06
('ILCD 2.0 2018 midpoint', 'ecosystem quality', 'freshwater and terrestrial acidification')	'ATR BM, HT+LT, + CCS (MDEA), 98 (average), digestate incineration' (megajoule, CH, None)	CO2 transport and storage	1.60359e-06
('ILCD 2.0 2018 midpoint', 'ecosystem quality', 'freshwater and terrestrial acidification')	'ATR BM, HT+LT, + CCS (MDEA), 98 (average), digestate incineration' (megajoule, CH, None)	Direct CO2 emissions	0
('ILCD 2.0 2018 midpoint', 'ecosystem quality', 'freshwater and terrestrial acidification')	'ATR BM, HT+LT, + CCS (MDEA), 98 (average), digestate incineration' (megajoule, CH, None)	Emissions from fuel burning in furnace	1.8498e-05
('ILCD 2.0 2018 midpoint', 'ecosystem quality', 'freshwater and terrestrial acidification')	'ATR NG, HT+LT, + CCS (MDEA), 98 (average)' (megajoule, CH, None)	Fuel supply chain	4.84862e-05
('ILCD 2.0 2018 midpoint', 'ecosystem quality', 'freshwater and terrestrial acidification')	'ATR NG, HT+LT, + CCS (MDEA), 98 (average)' (megajoule, CH, None)	Plant infrastructure	7.89943e-06
('ILCD 2.0 2018 midpoint', 'ecosystem quality', 'freshwater and terrestrial acidification')	'ATR NG, HT+LT, + CCS (MDEA), 98 (average)' (megajoule, CH, None)	Electricity from/to grid	2.00283e-05
('ILCD 2.0 2018 midpoint', 'ecosystem quality', 'freshwater and terrestrial acidification')	'ATR NG, HT+LT, + CCS (MDEA), 98 (average)' (megajoule, CH, None)	Water supply	2.47441e-07
('ILCD 2.0 2018 midpoint', 'ecosystem quality', 'freshwater and terrestrial acidification')	'ATR NG, HT+LT, + CCS (MDEA), 98 (average)' (megajoule, CH, None)	Catalysts&adsorbents	7.88384e-06
('ILCD 2.0 2018 midpoint', 'ecosystem quality', 'freshwater and terrestrial acidification')	'ATR NG, HT+LT, + CCS (MDEA), 98 (average)' (megajoule, CH, None)	CO2 transport and storage	1.60863e-06
('ILCD 2.0 2018 midpoint', 'ecosystem quality', 'freshwater and terrestrial acidification')	'ATR NG, HT+LT, + CCS (MDEA), 98 (average)' (megajoule, CH, None)	Direct CO2 emissions	0
('ILCD 2.0 2018 midpoint', 'ecosystem quality', 'freshwater and terrestrial acidification')	'ATR NG, HT+LT, + CCS (MDEA), 98 (average)' (megajoule, CH, None)	Emissions from fuel burning in furnace	1.8498e-05
('ILCD 2.0 2018 midpoint', 'ecosystem quality', 'freshwater and terrestrial acidification')	'ATR NG, HT+LT, + CCS (MDEA), 90 (upper bound)' (megajoule, CH, None)	Fuel supply chain	4.8481e-05
('ILCD 2.0 2018 midpoint', 'ecosystem quality', 'freshwater and terrestrial acidification')	'ATR NG, HT+LT, + CCS (MDEA), 90 (upper bound)' (megajoule, CH, None)	Plant infrastructure	7.89859e-06
('ILCD 2.0 2018 midpoint', 'ecosystem quality', 'freshwater and terrestrial acidification')	'ATR NG, HT+LT, + CCS (MDEA), 90 (upper bound)' (megajoule, CH, None)	Electricity from/to grid	1.88199e-05
('ILCD 2.0 2018 midpoint', 'ecosystem quality', 'freshwater and terrestrial acidification')	'ATR NG, HT+LT, + CCS (MDEA), 90 (upper bound)' (megajoule, CH, None)	Water supply	2.47414e-07
('ILCD 2.0 2018 midpoint', 'ecosystem quality', 'freshwater and terrestrial acidification')	'ATR NG, HT+LT, + CCS (MDEA), 90 (upper bound)' (megajoule, CH, None)	Catalysts&adsorbents	7.88135e-06
('ILCD 2.0 2018 midpoint', 'ecosystem quality', 'freshwater and terrestrial acidification')	'ATR NG, HT+LT, + CCS (MDEA), 90 (upper bound)' (megajoule, CH, None)	CO2 transport and storage	1.47715e-06
('ILCD 2.0 2018 midpoint', 'ecosystem quality', 'freshwater and terrestrial acidification')	'ATR NG, HT+LT, + CCS (MDEA), 90 (upper bound)' (megajoule, CH, None)	Direct CO2 emissions	0
('ILCD 2.0 2018 midpoint', 'ecosystem quality', 'freshwater and terrestrial acidification')	'ATR NG, HT+LT, + CCS (MDEA), 90 (upper bound)' (megajoule, CH, None)	Emissions from fuel burning in furnace	1.8498e-05
('ILCD 2.0 2018 midpoint', 'ecosystem quality', 'freshwater and terrestrial acidification')	'ATR NG, HT+LT, + CCS (VPSA), 98 (upper bound)' (megajoule, CH, None)	Fuel supply chain	4.89442e-05
('ILCD 2.0 2018 midpoint', 'ecosystem quality', 'freshwater and terrestrial acidification')	'ATR NG, HT+LT, + CCS (VPSA), 98 (upper bound)' (megajoule, CH, None)	Plant infrastructure	7.89893e-06
('ILCD 2.0 2018 midpoint', 'ecosystem quality', 'freshwater and terrestrial acidification')	'ATR NG, HT+LT, + CCS (VPSA), 98 (upper bound)' (megajoule, CH, None)	Electricity from/to grid	2.92791e-05
('ILCD 2.0 2018 midpoint', 'ecosystem quality', 'freshwater and terrestrial acidification')	'ATR NG, HT+LT, + CCS (VPSA), 98 (upper bound)' (megajoule, CH, None)	Water supply	2.47425e-07
('ILCD 2.0 2018 midpoint', 'ecosystem quality', 'freshwater and terrestrial acidification')	'ATR NG, HT+LT, + CCS (VPSA), 98 (upper bound)' (megajoule, CH, None)	Catalysts&adsorbents	7.85337e-06
('ILCD 2.0 2018 midpoint', 'ecosystem quality', 'freshwater and terrestrial acidification')	'ATR NG, HT+LT, + CCS (VPSA), 98 (upper bound)' (megajoule, CH, None)	CO2 transport and storage	1.65626e-06
('ILCD 2.0 2018 midpoint', 'ecosystem quality', 'freshwater and terrestrial acidification')	'ATR NG, HT+LT, + CCS (VPSA), 98 (upper bound)' (megajoule, CH, None)	Direct CO2 emissions	0
('ILCD 2.0 2018 midpoint', 'ecosystem quality', 'freshwater and terrestrial acidification')	'ATR NG, HT+LT, + CCS (VPSA), 98 (upper bound)' (megajoule, CH, None)	Emissions from fuel burning in furnace	1.8498e-05
('ILCD 2.0 2018 midpoint', 'ecosystem quality', 'freshwater and terrestrial acidification')	'ATR BM, HT+LT, hydropower electricity' (megajoule, CH, None)	Fuel supply chain	0.000102647
('ILCD 2.0 2018 midpoint', 'ecosystem quality', 'freshwater and terrestrial acidification')	'ATR BM, HT+LT, hydropower electricity' (megajoule, CH, None)	Plant infrastructure	7.89893e-06
('ILCD 2.0 2018 midpoint', 'ecosystem quality', 'freshwater and terrestrial acidification')	'ATR BM, HT+LT, hydropower electricity' (megajoule, CH, None)	Electricity from/to grid	1.17174e-07
('ILCD 2.0 2018 midpoint', 'ecosystem quality', 'freshwater and terrestrial acidification')	'ATR BM, HT+LT, hydropower electricity' (megajoule, CH, None)	Water supply	2.47425e-07
('ILCD 2.0 2018 midpoint', 'ecosystem quality', 'freshwater and terrestrial acidification')	'ATR BM, HT+LT, hydropower electricity' (megajoule, CH, None)	Catalysts&adsorbents	7.85337e-06
('ILCD 2.0 2018 midpoint', 'ecosystem quality', 'freshwater and terrestrial acidification')	'ATR BM, HT+LT, hydropower electricity' (megajoule, CH, None)	Direct CO2 emissions	0
('ILCD 2.0 2018 midpoint', 'ecosystem quality', 'freshwater and terrestrial acidification')	'ATR BM, HT+LT, hydropower electricity' (megajoule, CH, None)	Emissions from fuel burning in furnace	1.8498e-05
('ILCD 2.0 2018 midpoint', 'ecosystem quality', 'freshwater and terrestrial acidification')	'ATR BM, HT+LT, + CCS (MDEA), 98 (average)' (megajoule, CH, None)	Fuel supply chain	0.000102648
('ILCD 2.0 2018 midpoint', 'ecosystem quality', 'freshwater and terrestrial acidification')	'ATR BM, HT+LT, + CCS (MDEA), 98 (average)' (megajoule, CH, None)	Plant infrastructure	7.89891e-06
('ILCD 2.0 2018 midpoint', 'ecosystem quality', 'freshwater and terrestrial acidification')	'ATR BM, HT+LT, + CCS (MDEA), 98 (average)' (megajoule, CH, None)	Electricity from/to grid	1.91036e-05
('ILCD 2.0 2018 midpoint', 'ecosystem quality', 'freshwater and terrestrial acidification')	'ATR BM, HT+LT, + CCS (MDEA), 98 (average)' (megajoule, CH, None)	Water supply	2.47425e-07
('ILCD 2.0 2018 midpoint', 'ecosystem quality', 'freshwater and terrestrial acidification')	'ATR BM, HT+LT, + CCS (MDEA), 98 (average)' (megajoule, CH, None)	Catalysts&adsorbents	7.85337e-06
('ILCD 2.0 2018 midpoint', 'ecosystem quality', 'freshwater and terrestrial acidification')	'ATR BM, HT+LT, + CCS (MDEA), 98 (average)' (megajoule, CH, None)	CO2 transport and storage	1.60359e-06
('ILCD 2.0 2018 midpoint', 'ecosystem quality', 'freshwater and terrestrial acidification')	'ATR BM, HT+LT, + CCS (MDEA), 98 (average)' (megajoule, CH, None)	Direct CO2 emissions	0
('ILCD 2.0 2018 midpoint', 'ecosystem quality', 'freshwater and terrestrial acidification')	'ATR BM, HT+LT, + CCS (MDEA), 98 (average)' (megajoule, CH, None)	Emissions from fuel burning in furnace	1.8498e-05
('ILCD 2.0 2018 midpoint', 'ecosystem quality', 'freshwater and terrestrial acidification')	'ATR BM, HT+LT, + CCS (MDEA), 90 (average)' (megajoule, CH, None)	Fuel supply chain	0.000102648
('ILCD 2.0 2018 midpoint', 'ecosystem quality', 'freshwater and terrestrial acidification')	'ATR BM, HT+LT, + CCS (MDEA), 90 (average)' (megajoule, CH, None)	Plant infrastructure	7.89891e-06
('ILCD 2.0 2018 midpoint', 'ecosystem quality', 'freshwater and terrestrial acidification')	'ATR BM, HT+LT, + CCS (MDEA), 90 (average)' (megajoule, CH, None)	Electricity from/to grid	1.77705e-05
('ILCD 2.0 2018 midpoint', 'ecosystem quality', 'freshwater and terrestrial acidification')	'ATR BM, HT+LT, + CCS (MDEA), 90 (average)' (megajoule, CH, None)	Water supply	2.47425e-07
('ILCD 2.0 2018 midpoint', 'ecosystem quality', 'freshwater and terrestrial acidification')	'ATR BM, HT+LT, + CCS (MDEA), 90 (average)' (megajoule, CH, None)	Catalysts&adsorbents	7.85337e-06
('ILCD 2.0 2018 midpoint', 'ecosystem quality', 'freshwater and terrestrial acidification')	'ATR BM, HT+LT, + CCS (MDEA), 90 (average)' (megajoule, CH, None)	CO2 transport and storage	1.47269e-06
('ILCD 2.0 2018 midpoint', 'ecosystem quality', 'freshwater and terrestrial acidification')	'ATR BM, HT+LT, + CCS (MDEA), 90 (average)' (megajoule, CH, None)	Direct CO2 emissions	0
('ILCD 2.0 2018 midpoint', 'ecosystem quality', 'freshwater and terrestrial acidification')	'ATR BM, HT+LT, + CCS (MDEA), 90 (average)' (megajoule, CH, None)	Emissions from fuel burning in furnace	1.8498e-05
('ILCD 2.0 2018 midpoint', 'ecosystem quality', 'freshwater and terrestrial acidification')	'ATR NG, HT+LT, + CCS (VPSA), 98 (average)' (megajoule, CH, None)	Fuel supply chain	4.87219e-05
('ILCD 2.0 2018 midpoint', 'ecosystem quality', 'freshwater and terrestrial acidification')	'ATR NG, HT+LT, + CCS (VPSA), 98 (average)' (megajoule, CH, None)	Plant infrastructure	7.89906e-06
('ILCD 2.0 2018 midpoint', 'ecosystem quality', 'freshwater and terrestrial acidification')	'ATR NG, HT+LT, + CCS (VPSA), 98 (average)' (megajoule, CH, None)	Electricity from/to grid	2.84326e-05
('ILCD 2.0 2018 midpoint', 'ecosystem quality', 'freshwater and terrestrial acidification')	'ATR NG, HT+LT, + CCS (VPSA), 98 (average)' (megajoule, CH, None)	Water supply	2.47429e-07
('ILCD 2.0 2018 midpoint', 'ecosystem quality', 'freshwater and terrestrial acidification')	'ATR NG, HT+LT, + CCS (VPSA), 98 (average)' (megajoule, CH, None)	Catalysts&adsorbents	7.85337e-06
('ILCD 2.0 2018 midpoint', 'ecosystem quality', 'freshwater and terrestrial acidification')	'ATR NG, HT+LT, + CCS (VPSA), 98 (average)' (megajoule, CH, None)	CO2 transport and storage	1.6488e-06
('ILCD 2.0 2018 midpoint', 'ecosystem quality', 'freshwater and terrestrial acidification')	'ATR NG, HT+LT, + CCS (VPSA), 98 (average)' (megajoule, CH, None)	Direct CO2 emissions	0
('ILCD 2.0 2018 midpoint', 'ecosystem quality', 'freshwater and terrestrial acidification')	'ATR NG, HT+LT, + CCS (VPSA), 98 (average)' (megajoule, CH, None)	Emissions from fuel burning in furnace	1.8498e-05
('ILCD 2.0 2018 midpoint', 'ecosystem quality', 'freshwater and terrestrial acidification')	'ATR BM, HT+LT, + CCS (VPSA), 98 (average)' (megajoule, CH, None)	Fuel supply chain	0.000103155
('ILCD 2.0 2018 midpoint', 'ecosystem quality', 'freshwater and terrestrial acidification')	'ATR BM, HT+LT, + CCS (VPSA), 98 (average)' (megajoule, CH, None)	Plant infrastructure	7.89889e-06
('ILCD 2.0 2018 midpoint', 'ecosystem quality', 'freshwater and terrestrial acidification')	'ATR BM, HT+LT, + CCS (VPSA), 98 (average)' (megajoule, CH, None)	Electricity from/to grid	2.72611e-05
('ILCD 2.0 2018 midpoint', 'ecosystem quality', 'freshwater and terrestrial acidification')	'ATR BM, HT+LT, + CCS (VPSA), 98 (average)' (megajoule, CH, None)	Water supply	2.47424e-07
('ILCD 2.0 2018 midpoint', 'ecosystem quality', 'freshwater and terrestrial acidification')	'ATR BM, HT+LT, + CCS (VPSA), 98 (average)' (megajoule, CH, None)	Catalysts&adsorbents	7.85337e-06
('ILCD 2.0 2018 midpoint', 'ecosystem quality', 'freshwater and terrestrial acidification')	'ATR BM, HT+LT, + CCS (VPSA), 98 (average)' (megajoule, CH, None)	CO2 transport and storage	1.6434e-06
('ILCD 2.0 2018 midpoint', 'ecosystem quality', 'freshwater and terrestrial acidification')	'ATR BM, HT+LT, + CCS (VPSA), 98 (average)' (megajoule, CH, None)	Direct CO2 emissions	0
('ILCD 2.0 2018 midpoint', 'ecosystem quality', 'freshwater and terrestrial acidification')	'ATR BM, HT+LT, + CCS (VPSA), 98 (average)' (megajoule, CH, None)	Emissions from fuel burning in furnace	1.8498e-05
('ILCD 2.0 2018 midpoint', 'ecosystem quality', 'freshwater and terrestrial acidification')	'ATR BM, HT+LT, 25 bar' (megajoule, CH, None)	Fuel supply chain	0.000102647
('ILCD 2.0 2018 midpoint', 'ecosystem quality', 'freshwater and terrestrial acidification')	'ATR BM, HT+LT, 25 bar' (megajoule, CH, None)	Plant infrastructure	7.89893e-06
('ILCD 2.0 2018 midpoint', 'ecosystem quality', 'freshwater and terrestrial acidification')	'ATR BM, HT+LT, 25 bar' (megajoule, CH, None)	Electricity from/to grid	-1.17706e-05
('ILCD 2.0 2018 midpoint', 'ecosystem quality', 'freshwater and terrestrial acidification')	'ATR BM, HT+LT, 25 bar' (megajoule, CH, None)	Water supply	2.47425e-07
('ILCD 2.0 2018 midpoint', 'ecosystem quality', 'freshwater and terrestrial acidification')	'ATR BM, HT+LT, 25 bar' (megajoule, CH, None)	Catalysts&adsorbents	7.85337e-06
('ILCD 2.0 2018 midpoint', 'ecosystem quality', 'freshwater and terrestrial acidification')	'ATR BM, HT+LT, 25 bar' (megajoule, CH, None)	Direct CO2 emissions	0
('ILCD 2.0 2018 midpoint', 'ecosystem quality', 'freshwater and terrestrial acidification')	'ATR BM, HT+LT, 25 bar' (megajoule, CH, None)	Emissions from fuel burning in furnace	1.8498e-05
('ILCD 2.0 2018 midpoint', 'ecosystem quality', 'freshwater and terrestrial acidification')	'ATR NG, HT+LT, hydropower electricity' (megajoule, CH, None)	Fuel supply chain	4.84861e-05
('ILCD 2.0 2018 midpoint', 'ecosystem quality', 'freshwater and terrestrial acidification')	'ATR NG, HT+LT, hydropower electricity' (megajoule, CH, None)	Plant infrastructure	7.89941e-06
('ILCD 2.0 2018 midpoint', 'ecosystem quality', 'freshwater and terrestrial acidification')	'ATR NG, HT+LT, hydropower electricity' (megajoule, CH, None)	Electricity from/to grid	1.27977e-07
('ILCD 2.0 2018 midpoint', 'ecosystem quality', 'freshwater and terrestrial acidification')	'ATR NG, HT+LT, hydropower electricity' (megajoule, CH, None)	Water supply	2.47441e-07
('ILCD 2.0 2018 midpoint', 'ecosystem quality', 'freshwater and terrestrial acidification')	'ATR NG, HT+LT, hydropower electricity' (megajoule, CH, None)	Catalysts&adsorbents	7.85337e-06
('ILCD 2.0 2018 midpoint', 'ecosystem quality', 'freshwater and terrestrial acidification')	'ATR NG, HT+LT, hydropower electricity' (megajoule, CH, None)	Direct CO2 emissions	0
('ILCD 2.0 2018 midpoint', 'ecosystem quality', 'freshwater and terrestrial acidification')	'ATR NG, HT+LT, hydropower electricity' (megajoule, CH, None)	Emissions from fuel burning in furnace	1.8498e-05
('ILCD 2.0 2018 midpoint', 'ecosystem quality', 'freshwater and terrestrial acidification')	'ATR NG, HT+LT, + CCS (MDEA), 98 (upper bound)' (megajoule, CH, None)	Fuel supply chain	4.84864e-05
('ILCD 2.0 2018 midpoint', 'ecosystem quality', 'freshwater and terrestrial acidification')	'ATR NG, HT+LT, + CCS (MDEA), 98 (upper bound)' (megajoule, CH, None)	Plant infrastructure	7.89946e-06
('ILCD 2.0 2018 midpoint', 'ecosystem quality', 'freshwater and terrestrial acidification')	'ATR NG, HT+LT, + CCS (MDEA), 98 (upper bound)' (megajoule, CH, None)	Electricity from/to grid	2.00984e-05
('ILCD 2.0 2018 midpoint', 'ecosystem quality', 'freshwater and terrestrial acidification')	'ATR NG, HT+LT, + CCS (MDEA), 98 (upper bound)' (megajoule, CH, None)	Water supply	2.47442e-07
('ILCD 2.0 2018 midpoint', 'ecosystem quality', 'freshwater and terrestrial acidification')	'ATR NG, HT+LT, + CCS (MDEA), 98 (upper bound)' (megajoule, CH, None)	Catalysts&adsorbents	7.88384e-06
('ILCD 2.0 2018 midpoint', 'ecosystem quality', 'freshwater and terrestrial acidification')	'ATR NG, HT+LT, + CCS (MDEA), 98 (upper bound)' (megajoule, CH, None)	CO2 transport and storage	1.60863e-06
('ILCD 2.0 2018 midpoint', 'ecosystem quality', 'freshwater and terrestrial acidification')	'ATR NG, HT+LT, + CCS (MDEA), 98 (upper bound)' (megajoule, CH, None)	Direct CO2 emissions	0
('ILCD 2.0 2018 midpoint', 'ecosystem quality', 'freshwater and terrestrial acidification')	'ATR NG, HT+LT, + CCS (MDEA), 98 (upper bound)' (megajoule, CH, None)	Emissions from fuel burning in furnace	1.8498e-05
('ILCD 2.0 2018 midpoint', 'ecosystem quality', 'freshwater and terrestrial acidification')	'ATR BM, HT+LT, + CCS (MDEA), 98 (average), cut-off approach' (megajoule, CH, None)	Fuel supply chain	0.000102688
('ILCD 2.0 2018 midpoint', 'ecosystem quality', 'freshwater and terrestrial acidification')	'ATR BM, HT+LT, + CCS (MDEA), 98 (average), cut-off approach' (megajoule, CH, None)	Plant infrastructure	7.89893e-06
('ILCD 2.0 2018 midpoint', 'ecosystem quality', 'freshwater and terrestrial acidification')	'ATR BM, HT+LT, + CCS (MDEA), 98 (average), cut-off approach' (megajoule, CH, None)	Electricity from/to grid	2.64087e-05
('ILCD 2.0 2018 midpoint', 'ecosystem quality', 'freshwater and terrestrial acidification')	'ATR BM, HT+LT, + CCS (MDEA), 98 (average), cut-off approach' (megajoule, CH, None)	Water supply	2.47425e-07
('ILCD 2.0 2018 midpoint', 'ecosystem quality', 'freshwater and terrestrial acidification')	'ATR BM, HT+LT, + CCS (MDEA), 98 (average), cut-off approach' (megajoule, CH, None)	Catalysts&adsorbents	7.85337e-06
('ILCD 2.0 2018 midpoint', 'ecosystem quality', 'freshwater and terrestrial acidification')	'ATR BM, HT+LT, + CCS (MDEA), 98 (average), cut-off approach' (megajoule, CH, None)	CO2 transport and storage	1.63589e-06
('ILCD 2.0 2018 midpoint', 'ecosystem quality', 'freshwater and terrestrial acidification')	'ATR BM, HT+LT, + CCS (MDEA), 98 (average), cut-off approach' (megajoule, CH, None)	Direct CO2 emissions	0
('ILCD 2.0 2018 midpoint', 'ecosystem quality', 'freshwater and terrestrial acidification')	'ATR BM, HT+LT, + CCS (MDEA), 98 (average), cut-off approach' (megajoule, CH, None)	Emissions from fuel burning in furnace	1.8498e-05
('ILCD 2.0 2018 midpoint', 'ecosystem quality', 'freshwater and terrestrial acidification')	'ATR NG, HT+LT' (megajoule, CH, None)	Fuel supply chain	4.84861e-05
('ILCD 2.0 2018 midpoint', 'ecosystem quality', 'freshwater and terrestrial acidification')	'ATR NG, HT+LT' (megajoule, CH, None)	Plant infrastructure	7.89941e-06
('ILCD 2.0 2018 midpoint', 'ecosystem quality', 'freshwater and terrestrial acidification')	'ATR NG, HT+LT' (megajoule, CH, None)	Electricity from/to grid	1.09575e-05
('ILCD 2.0 2018 midpoint', 'ecosystem quality', 'freshwater and terrestrial acidification')	'ATR NG, HT+LT' (megajoule, CH, None)	Water supply	2.47441e-07
('ILCD 2.0 2018 midpoint', 'ecosystem quality', 'freshwater and terrestrial acidification')	'ATR NG, HT+LT' (megajoule, CH, None)	Catalysts&adsorbents	7.85337e-06
('ILCD 2.0 2018 midpoint', 'ecosystem quality', 'freshwater and terrestrial acidification')	'ATR NG, HT+LT' (megajoule, CH, None)	Direct CO2 emissions	0
('ILCD 2.0 2018 midpoint', 'ecosystem quality', 'freshwater and terrestrial acidification')	'ATR NG, HT+LT' (megajoule, CH, None)	Emissions from fuel burning in furnace	1.8498e-05
('ILCD 2.0 2018 midpoint', 'ecosystem quality', 'freshwater and terrestrial acidification')	'ATR BM, HT+LT' (megajoule, CH, None)	Fuel supply chain	0.000102647
('ILCD 2.0 2018 midpoint', 'ecosystem quality', 'freshwater and terrestrial acidification')	'ATR BM, HT+LT' (megajoule, CH, None)	Plant infrastructure	7.89893e-06
('ILCD 2.0 2018 midpoint', 'ecosystem quality', 'freshwater and terrestrial acidification')	'ATR BM, HT+LT' (megajoule, CH, None)	Electricity from/to grid	1.00326e-05
('ILCD 2.0 2018 midpoint', 'ecosystem quality', 'freshwater and terrestrial acidification')	'ATR BM, HT+LT' (megajoule, CH, None)	Water supply	2.47425e-07
('ILCD 2.0 2018 midpoint', 'ecosystem quality', 'freshwater and terrestrial acidification')	'ATR BM, HT+LT' (megajoule, CH, None)	Catalysts&adsorbents	7.85337e-06
('ILCD 2.0 2018 midpoint', 'ecosystem quality', 'freshwater and terrestrial acidification')	'ATR BM, HT+LT' (megajoule, CH, None)	Direct CO2 emissions	0
('ILCD 2.0 2018 midpoint', 'ecosystem quality', 'freshwater and terrestrial acidification')	'ATR BM, HT+LT' (megajoule, CH, None)	Emissions from fuel burning in furnace	1.8498e-05
('ILCD 2.0 2018 midpoint', 'ecosystem quality', 'freshwater and terrestrial acidification')	'ATR NG, HT+LT, + CCS (MDEA), 90 (average)' (megajoule, CH, None)	Fuel supply chain	4.84835e-05
('ILCD 2.0 2018 midpoint', 'ecosystem quality', 'freshwater and terrestrial acidification')	'ATR NG, HT+LT, + CCS (MDEA), 90 (average)' (megajoule, CH, None)	Plant infrastructure	7.899e-06
('ILCD 2.0 2018 midpoint', 'ecosystem quality', 'freshwater and terrestrial acidification')	'ATR NG, HT+LT, + CCS (MDEA), 90 (average)' (megajoule, CH, None)	Electricity from/to grid	1.87517e-05
('ILCD 2.0 2018 midpoint', 'ecosystem quality', 'freshwater and terrestrial acidification')	'ATR NG, HT+LT, + CCS (MDEA), 90 (average)' (megajoule, CH, None)	Water supply	2.47428e-07
('ILCD 2.0 2018 midpoint', 'ecosystem quality', 'freshwater and terrestrial acidification')	'ATR NG, HT+LT, + CCS (MDEA), 90 (average)' (megajoule, CH, None)	Catalysts&adsorbents	7.88135e-06
('ILCD 2.0 2018 midpoint', 'ecosystem quality', 'freshwater and terrestrial acidification')	'ATR NG, HT+LT, + CCS (MDEA), 90 (average)' (megajoule, CH, None)	CO2 transport and storage	1.47723e-06
('ILCD 2.0 2018 midpoint', 'ecosystem quality', 'freshwater and terrestrial acidification')	'ATR NG, HT+LT, + CCS (MDEA), 90 (average)' (megajoule, CH, None)	Direct CO2 emissions	0
('ILCD 2.0 2018 midpoint', 'ecosystem quality', 'freshwater and terrestrial acidification')	'ATR NG, HT+LT, + CCS (MDEA), 90 (average)' (megajoule, CH, None)	Emissions from fuel burning in furnace	1.8498e-05
('ILCD 2.0 2018 midpoint', 'ecosystem quality', 'freshwater and terrestrial acidification')	'ATR BM, HT+LT, + CCS (MDEA), 98 (average), 25 bar' (megajoule, CH, None)	Fuel supply chain	0.000102648
('ILCD 2.0 2018 midpoint', 'ecosystem quality', 'freshwater and terrestrial acidification')	'ATR BM, HT+LT, + CCS (MDEA), 98 (average), 25 bar' (megajoule, CH, None)	Plant infrastructure	7.89891e-06
('ILCD 2.0 2018 midpoint', 'ecosystem quality', 'freshwater and terrestrial acidification')	'ATR BM, HT+LT, + CCS (MDEA), 98 (average), 25 bar' (megajoule, CH, None)	Electricity from/to grid	-2.69954e-06
('ILCD 2.0 2018 midpoint', 'ecosystem quality', 'freshwater and terrestrial acidification')	'ATR BM, HT+LT, + CCS (MDEA), 98 (average), 25 bar' (megajoule, CH, None)	Water supply	2.47425e-07
('ILCD 2.0 2018 midpoint', 'ecosystem quality', 'freshwater and terrestrial acidification')	'ATR BM, HT+LT, + CCS (MDEA), 98 (average), 25 bar' (megajoule, CH, None)	Catalysts&adsorbents	7.85337e-06
('ILCD 2.0 2018 midpoint', 'ecosystem quality', 'freshwater and terrestrial acidification')	'ATR BM, HT+LT, + CCS (MDEA), 98 (average), 25 bar' (megajoule, CH, None)	CO2 transport and storage	1.60359e-06
('ILCD 2.0 2018 midpoint', 'ecosystem quality', 'freshwater and terrestrial acidification')	'ATR BM, HT+LT, + CCS (MDEA), 98 (average), 25 bar' (megajoule, CH, None)	Direct CO2 emissions	0
('ILCD 2.0 2018 midpoint', 'ecosystem quality', 'freshwater and terrestrial acidification')	'ATR BM, HT+LT, + CCS (MDEA), 98 (average), 25 bar' (megajoule, CH, None)	Emissions from fuel burning in furnace	1.8498e-05
('ILCD 2.0 2018 midpoint', 'ecosystem quality', 'freshwater and terrestrial acidification')	'ATR NG, HT+LT, + CCS (VPSA), 98 (lower bound)' (megajoule, CH, None)	Fuel supply chain	4.84997e-05
('ILCD 2.0 2018 midpoint', 'ecosystem quality', 'freshwater and terrestrial acidification')	'ATR NG, HT+LT, + CCS (VPSA), 98 (lower bound)' (megajoule, CH, None)	Plant infrastructure	7.89919e-06
('ILCD 2.0 2018 midpoint', 'ecosystem quality', 'freshwater and terrestrial acidification')	'ATR NG, HT+LT, + CCS (VPSA), 98 (lower bound)' (megajoule, CH, None)	Electricity from/to grid	2.75861e-05
('ILCD 2.0 2018 midpoint', 'ecosystem quality', 'freshwater and terrestrial acidification')	'ATR NG, HT+LT, + CCS (VPSA), 98 (lower bound)' (megajoule, CH, None)	Water supply	2.47433e-07
('ILCD 2.0 2018 midpoint', 'ecosystem quality', 'freshwater and terrestrial acidification')	'ATR NG, HT+LT, + CCS (VPSA), 98 (lower bound)' (megajoule, CH, None)	Catalysts&adsorbents	7.85337e-06
('ILCD 2.0 2018 midpoint', 'ecosystem quality', 'freshwater and terrestrial acidification')	'ATR NG, HT+LT, + CCS (VPSA), 98 (lower bound)' (megajoule, CH, None)	CO2 transport and storage	1.64134e-06
('ILCD 2.0 2018 midpoint', 'ecosystem quality', 'freshwater and terrestrial acidification')	'ATR NG, HT+LT, + CCS (VPSA), 98 (lower bound)' (megajoule, CH, None)	Direct CO2 emissions	0
('ILCD 2.0 2018 midpoint', 'ecosystem quality', 'freshwater and terrestrial acidification')	'ATR NG, HT+LT, + CCS (VPSA), 98 (lower bound)' (megajoule, CH, None)	Emissions from fuel burning in furnace	1.8498e-05
('ILCD 2.0 2018 midpoint', 'ecosystem quality', 'freshwater and terrestrial acidification')	'ATR BM, HT+LT, + CCS (MDEA), 98 (average), maximum C uptake' (megajoule, CH, None)	Fuel supply chain	0.000102648
('ILCD 2.0 2018 midpoint', 'ecosystem quality', 'freshwater and terrestrial acidification')	'ATR BM, HT+LT, + CCS (MDEA), 98 (average), maximum C uptake' (megajoule, CH, None)	Plant infrastructure	7.89891e-06
('ILCD 2.0 2018 midpoint', 'ecosystem quality', 'freshwater and terrestrial acidification')	'ATR BM, HT+LT, + CCS (MDEA), 98 (average), maximum C uptake' (megajoule, CH, None)	Electricity from/to grid	1.91036e-05
('ILCD 2.0 2018 midpoint', 'ecosystem quality', 'freshwater and terrestrial acidification')	'ATR BM, HT+LT, + CCS (MDEA), 98 (average), maximum C uptake' (megajoule, CH, None)	Water supply	2.47425e-07
('ILCD 2.0 2018 midpoint', 'ecosystem quality', 'freshwater and terrestrial acidification')	'ATR BM, HT+LT, + CCS (MDEA), 98 (average), maximum C uptake' (megajoule, CH, None)	Catalysts&adsorbents	7.85337e-06
('ILCD 2.0 2018 midpoint', 'ecosystem quality', 'freshwater and terrestrial acidification')	'ATR BM, HT+LT, + CCS (MDEA), 98 (average), maximum C uptake' (megajoule, CH, None)	CO2 transport and storage	1.60359e-06
('ILCD 2.0 2018 midpoint', 'ecosystem quality', 'freshwater and terrestrial acidification')	'ATR BM, HT+LT, + CCS (MDEA), 98 (average), maximum C uptake' (megajoule, CH, None)	Direct CO2 emissions	0
('ILCD 2.0 2018 midpoint', 'ecosystem quality', 'freshwater and terrestrial acidification')	'ATR BM, HT+LT, + CCS (MDEA), 98 (average), maximum C uptake' (megajoule, CH, None)	Emissions from fuel burning in furnace	1.8498e-05
('ILCD 2.0 2018 midpoint', 'ecosystem quality', 'freshwater and terrestrial acidification')	'ATR BM, HT+LT, + CCS (VPSA), 98 (average), cut-off approach' (megajoule, CH, None)	Fuel supply chain	0.000103155
('ILCD 2.0 2018 midpoint', 'ecosystem quality', 'freshwater and terrestrial acidification')	'ATR BM, HT+LT, + CCS (VPSA), 98 (average), cut-off approach' (megajoule, CH, None)	Plant infrastructure	7.89889e-06
('ILCD 2.0 2018 midpoint', 'ecosystem quality', 'freshwater and terrestrial acidification')	'ATR BM, HT+LT, + CCS (VPSA), 98 (average), cut-off approach' (megajoule, CH, None)	Electricity from/to grid	2.72611e-05
('ILCD 2.0 2018 midpoint', 'ecosystem quality', 'freshwater and terrestrial acidification')	'ATR BM, HT+LT, + CCS (VPSA), 98 (average), cut-off approach' (megajoule, CH, None)	Water supply	2.47424e-07
('ILCD 2.0 2018 midpoint', 'ecosystem quality', 'freshwater and terrestrial acidification')	'ATR BM, HT+LT, + CCS (VPSA), 98 (average), cut-off approach' (megajoule, CH, None)	Catalysts&adsorbents	7.85337e-06
('ILCD 2.0 2018 midpoint', 'ecosystem quality', 'freshwater and terrestrial acidification')	'ATR BM, HT+LT, + CCS (VPSA), 98 (average), cut-off approach' (megajoule, CH, None)	CO2 transport and storage	1.6434e-06
('ILCD 2.0 2018 midpoint', 'ecosystem quality', 'freshwater and terrestrial acidification')	'ATR BM, HT+LT, + CCS (VPSA), 98 (average), cut-off approach' (megajoule, CH, None)	Direct CO2 emissions	0
('ILCD 2.0 2018 midpoint', 'ecosystem quality', 'freshwater and terrestrial acidification')	'ATR BM, HT+LT, + CCS (VPSA), 98 (average), cut-off approach' (megajoule, CH, None)	Emissions from fuel burning in furnace	1.8498e-05
('ILCD 2.0 2018 midpoint', 'ecosystem quality', 'freshwater and terrestrial acidification')	'SMR NG, HT+LT, + CCS (VPSA), 98 (average)' (megajoule, CH, None)	Fuel supply chain	4.79669e-05
('ILCD 2.0 2018 midpoint', 'ecosystem quality', 'freshwater and terrestrial acidification')	'SMR NG, HT+LT, + CCS (VPSA), 98 (average)' (megajoule, CH, None)	Plant infrastructure	7.89876e-06
('ILCD 2.0 2018 midpoint', 'ecosystem quality', 'freshwater and terrestrial acidification')	'SMR NG, HT+LT, + CCS (VPSA), 98 (average)' (megajoule, CH, None)	Water supply	2.4742e-07
('ILCD 2.0 2018 midpoint', 'ecosystem quality', 'freshwater and terrestrial acidification')	'SMR NG, HT+LT, + CCS (VPSA), 98 (average)' (megajoule, CH, None)	Electricity from/to grid	1.46023e-05
('ILCD 2.0 2018 midpoint', 'ecosystem quality', 'freshwater and terrestrial acidification')	'SMR NG, HT+LT, + CCS (VPSA), 98 (average)' (megajoule, CH, None)	Catalysts&adsorbents	7.85337e-06
('ILCD 2.0 2018 midpoint', 'ecosystem quality', 'freshwater and terrestrial acidification')	'SMR NG, HT+LT, + CCS (VPSA), 98 (average)' (megajoule, CH, None)	CO2 transport and storage	1.18641e-06
('ILCD 2.0 2018 midpoint', 'ecosystem quality', 'freshwater and terrestrial acidification')	'SMR NG, HT+LT, + CCS (VPSA), 98 (average)' (megajoule, CH, None)	Direct CO2 emissions	0
('ILCD 2.0 2018 midpoint', 'ecosystem quality', 'freshwater and terrestrial acidification')	'SMR NG, HT+LT, + CCS (VPSA), 98 (average)' (megajoule, CH, None)	Emissions from fuel burning in furnace	3.79341e-06
('ILCD 2.0 2018 midpoint', 'ecosystem quality', 'freshwater and terrestrial acidification')	'SMR NG/BM, HT+LT, 20:80 + CCS (MDEA), 98 (average), digestate incineration' (megajoule, CH, None)	Fuel supply chain	8.8329e-05
('ILCD 2.0 2018 midpoint', 'ecosystem quality', 'freshwater and terrestrial acidification')	'SMR NG/BM, HT+LT, 20:80 + CCS (MDEA), 98 (average), digestate incineration' (megajoule, CH, None)	Plant infrastructure	7.8979e-06
('ILCD 2.0 2018 midpoint', 'ecosystem quality', 'freshwater and terrestrial acidification')	'SMR NG/BM, HT+LT, 20:80 + CCS (MDEA), 98 (average), digestate incineration' (megajoule, CH, None)	Water supply	2.47392e-07
('ILCD 2.0 2018 midpoint', 'ecosystem quality', 'freshwater and terrestrial acidification')	'SMR NG/BM, HT+LT, 20:80 + CCS (MDEA), 98 (average), digestate incineration' (megajoule, CH, None)	Electricity from/to grid	1.19788e-05
('ILCD 2.0 2018 midpoint', 'ecosystem quality', 'freshwater and terrestrial acidification')	'SMR NG/BM, HT+LT, 20:80 + CCS (MDEA), 98 (average), digestate incineration' (megajoule, CH, None)	Catalysts&adsorbents	7.87587e-06
('ILCD 2.0 2018 midpoint', 'ecosystem quality', 'freshwater and terrestrial acidification')	'SMR NG/BM, HT+LT, 20:80 + CCS (MDEA), 98 (average), digestate incineration' (megajoule, CH, None)	CO2 transport and storage	1.18777e-06
('ILCD 2.0 2018 midpoint', 'ecosystem quality', 'freshwater and terrestrial acidification')	'SMR NG/BM, HT+LT, 20:80 + CCS (MDEA), 98 (average), digestate incineration' (megajoule, CH, None)	Direct CO2 emissions	0
('ILCD 2.0 2018 midpoint', 'ecosystem quality', 'freshwater and terrestrial acidification')	'SMR NG/BM, HT+LT, 20:80 + CCS (MDEA), 98 (average), digestate incineration' (megajoule, CH, None)	Emissions from fuel burning in furnace	3.26277e-06
('ILCD 2.0 2018 midpoint', 'ecosystem quality', 'freshwater and terrestrial acidification')	'SMR NG, HT+LT, + CCS (MDEA), 98 (average), 100% BM, digestate incineration' (megajoule, CH, None)	Fuel supply chain	9.84996e-05
('ILCD 2.0 2018 midpoint', 'ecosystem quality', 'freshwater and terrestrial acidification')	'SMR NG, HT+LT, + CCS (MDEA), 98 (average), 100% BM, digestate incineration' (megajoule, CH, None)	Plant infrastructure	7.8979e-06
('ILCD 2.0 2018 midpoint', 'ecosystem quality', 'freshwater and terrestrial acidification')	'SMR NG, HT+LT, + CCS (MDEA), 98 (average), 100% BM, digestate incineration' (megajoule, CH, None)	Water supply	2.47392e-07
('ILCD 2.0 2018 midpoint', 'ecosystem quality', 'freshwater and terrestrial acidification')	'SMR NG, HT+LT, + CCS (MDEA), 98 (average), 100% BM, digestate incineration' (megajoule, CH, None)	Electricity from/to grid	1.19788e-05
('ILCD 2.0 2018 midpoint', 'ecosystem quality', 'freshwater and terrestrial acidification')	'SMR NG, HT+LT, + CCS (MDEA), 98 (average), 100% BM, digestate incineration' (megajoule, CH, None)	Catalysts&adsorbents	7.87587e-06
('ILCD 2.0 2018 midpoint', 'ecosystem quality', 'freshwater and terrestrial acidification')	'SMR NG, HT+LT, + CCS (MDEA), 98 (average), 100% BM, digestate incineration' (megajoule, CH, None)	CO2 transport and storage	1.18777e-06
('ILCD 2.0 2018 midpoint', 'ecosystem quality', 'freshwater and terrestrial acidification')	'SMR NG, HT+LT, + CCS (MDEA), 98 (average), 100% BM, digestate incineration' (megajoule, CH, None)	Direct CO2 emissions	0
('ILCD 2.0 2018 midpoint', 'ecosystem quality', 'freshwater and terrestrial acidification')	'SMR NG, HT+LT, + CCS (MDEA), 98 (average), 100% BM, digestate incineration' (megajoule, CH, None)	Emissions from fuel burning in furnace	3.26277e-06
('ILCD 2.0 2018 midpoint', 'ecosystem quality', 'freshwater and terrestrial acidification')	'SMR NG, HT+LT, 25 bar' (megajoule, CH, None)	Fuel supply chain	4.84694e-05
('ILCD 2.0 2018 midpoint', 'ecosystem quality', 'freshwater and terrestrial acidification')	'SMR NG, HT+LT, 25 bar' (megajoule, CH, None)	Plant infrastructure	7.89879e-06
('ILCD 2.0 2018 midpoint', 'ecosystem quality', 'freshwater and terrestrial acidification')	'SMR NG, HT+LT, 25 bar' (megajoule, CH, None)	Water supply	2.47421e-07
('ILCD 2.0 2018 midpoint', 'ecosystem quality', 'freshwater and terrestrial acidification')	'SMR NG, HT+LT, 25 bar' (megajoule, CH, None)	Electricity from/to grid	-2.15865e-05
('ILCD 2.0 2018 midpoint', 'ecosystem quality', 'freshwater and terrestrial acidification')	'SMR NG, HT+LT, 25 bar' (megajoule, CH, None)	Catalysts&adsorbents	7.85337e-06
('ILCD 2.0 2018 midpoint', 'ecosystem quality', 'freshwater and terrestrial acidification')	'SMR NG, HT+LT, 25 bar' (megajoule, CH, None)	Direct CO2 emissions	0
('ILCD 2.0 2018 midpoint', 'ecosystem quality', 'freshwater and terrestrial acidification')	'SMR NG, HT+LT, 25 bar' (megajoule, CH, None)	Emissions from fuel burning in furnace	3.57046e-06
('ILCD 2.0 2018 midpoint', 'ecosystem quality', 'freshwater and terrestrial acidification')	'SMR BM + CCS (MDEA), 90 (upper bound)' (megajoule, CH, None)	Fuel supply chain	0.000101708
('ILCD 2.0 2018 midpoint', 'ecosystem quality', 'freshwater and terrestrial acidification')	'SMR BM + CCS (MDEA), 90 (upper bound)' (megajoule, CH, None)	Plant infrastructure	7.8984e-06
('ILCD 2.0 2018 midpoint', 'ecosystem quality', 'freshwater and terrestrial acidification')	'SMR BM + CCS (MDEA), 90 (upper bound)' (megajoule, CH, None)	Water supply	2.47409e-07
('ILCD 2.0 2018 midpoint', 'ecosystem quality', 'freshwater and terrestrial acidification')	'SMR BM + CCS (MDEA), 90 (upper bound)' (megajoule, CH, None)	Electricity from/to grid	4.42963e-06
('ILCD 2.0 2018 midpoint', 'ecosystem quality', 'freshwater and terrestrial acidification')	'SMR BM + CCS (MDEA), 90 (upper bound)' (megajoule, CH, None)	Catalysts&adsorbents	7.871e-06
('ILCD 2.0 2018 midpoint', 'ecosystem quality', 'freshwater and terrestrial acidification')	'SMR BM + CCS (MDEA), 90 (upper bound)' (megajoule, CH, None)	CO2 transport and storage	9.30511e-07
('ILCD 2.0 2018 midpoint', 'ecosystem quality', 'freshwater and terrestrial acidification')	'SMR BM + CCS (MDEA), 90 (upper bound)' (megajoule, CH, None)	Direct CO2 emissions	0
('ILCD 2.0 2018 midpoint', 'ecosystem quality', 'freshwater and terrestrial acidification')	'SMR BM + CCS (MDEA), 90 (upper bound)' (megajoule, CH, None)	Emissions from fuel burning in furnace	2.47853e-06
('ILCD 2.0 2018 midpoint', 'ecosystem quality', 'freshwater and terrestrial acidification')	'SMR BM + CCS (MDEA), 90 (lower bound)' (megajoule, CH, None)	Fuel supply chain	0.000101708
('ILCD 2.0 2018 midpoint', 'ecosystem quality', 'freshwater and terrestrial acidification')	'SMR BM + CCS (MDEA), 90 (lower bound)' (megajoule, CH, None)	Plant infrastructure	7.8984e-06
('ILCD 2.0 2018 midpoint', 'ecosystem quality', 'freshwater and terrestrial acidification')	'SMR BM + CCS (MDEA), 90 (lower bound)' (megajoule, CH, None)	Water supply	2.47409e-07
('ILCD 2.0 2018 midpoint', 'ecosystem quality', 'freshwater and terrestrial acidification')	'SMR BM + CCS (MDEA), 90 (lower bound)' (megajoule, CH, None)	Electricity from/to grid	4.29084e-06
('ILCD 2.0 2018 midpoint', 'ecosystem quality', 'freshwater and terrestrial acidification')	'SMR BM + CCS (MDEA), 90 (lower bound)' (megajoule, CH, None)	Catalysts&adsorbents	7.871e-06
('ILCD 2.0 2018 midpoint', 'ecosystem quality', 'freshwater and terrestrial acidification')	'SMR BM + CCS (MDEA), 90 (lower bound)' (megajoule, CH, None)	CO2 transport and storage	9.30511e-07
('ILCD 2.0 2018 midpoint', 'ecosystem quality', 'freshwater and terrestrial acidification')	'SMR BM + CCS (MDEA), 90 (lower bound)' (megajoule, CH, None)	Direct CO2 emissions	0
('ILCD 2.0 2018 midpoint', 'ecosystem quality', 'freshwater and terrestrial acidification')	'SMR BM + CCS (MDEA), 90 (lower bound)' (megajoule, CH, None)	Emissions from fuel burning in furnace	2.47853e-06
('ILCD 2.0 2018 midpoint', 'ecosystem quality', 'freshwater and terrestrial acidification')	'SMR NG, HT+LT, + CCS (MDEA), 90 (average)' (megajoule, CH, None)	Fuel supply chain	4.769e-05
('ILCD 2.0 2018 midpoint', 'ecosystem quality', 'freshwater and terrestrial acidification')	'SMR NG, HT+LT, + CCS (MDEA), 90 (average)' (megajoule, CH, None)	Plant infrastructure	7.8979e-06
('ILCD 2.0 2018 midpoint', 'ecosystem quality', 'freshwater and terrestrial acidification')	'SMR NG, HT+LT, + CCS (MDEA), 90 (average)' (megajoule, CH, None)	Water supply	2.47392e-07
('ILCD 2.0 2018 midpoint', 'ecosystem quality', 'freshwater and terrestrial acidification')	'SMR NG, HT+LT, + CCS (MDEA), 90 (average)' (megajoule, CH, None)	Electricity from/to grid	8.64614e-06
('ILCD 2.0 2018 midpoint', 'ecosystem quality', 'freshwater and terrestrial acidification')	'SMR NG, HT+LT, + CCS (MDEA), 90 (average)' (megajoule, CH, None)	Catalysts&adsorbents	7.87406e-06
('ILCD 2.0 2018 midpoint', 'ecosystem quality', 'freshwater and terrestrial acidification')	'SMR NG, HT+LT, + CCS (MDEA), 90 (average)' (megajoule, CH, None)	CO2 transport and storage	1.09211e-06
('ILCD 2.0 2018 midpoint', 'ecosystem quality', 'freshwater and terrestrial acidification')	'SMR NG, HT+LT, + CCS (MDEA), 90 (average)' (megajoule, CH, None)	Direct CO2 emissions	0
('ILCD 2.0 2018 midpoint', 'ecosystem quality', 'freshwater and terrestrial acidification')	'SMR NG, HT+LT, + CCS (MDEA), 90 (average)' (megajoule, CH, None)	Emissions from fuel burning in furnace	3.27912e-06
('ILCD 2.0 2018 midpoint', 'ecosystem quality', 'freshwater and terrestrial acidification')	'SMR BM, HT+LT' (megajoule, CH, None)	Fuel supply chain	0.000103004
('ILCD 2.0 2018 midpoint', 'ecosystem quality', 'freshwater and terrestrial acidification')	'SMR BM, HT+LT' (megajoule, CH, None)	Plant infrastructure	7.89879e-06
('ILCD 2.0 2018 midpoint', 'ecosystem quality', 'freshwater and terrestrial acidification')	'SMR BM, HT+LT' (megajoule, CH, None)	Water supply	2.47421e-07
('ILCD 2.0 2018 midpoint', 'ecosystem quality', 'freshwater and terrestrial acidification')	'SMR BM, HT+LT' (megajoule, CH, None)	Electricity from/to grid	-9.79136e-07
('ILCD 2.0 2018 midpoint', 'ecosystem quality', 'freshwater and terrestrial acidification')	'SMR BM, HT+LT' (megajoule, CH, None)	Catalysts&adsorbents	7.85337e-06
('ILCD 2.0 2018 midpoint', 'ecosystem quality', 'freshwater and terrestrial acidification')	'SMR BM, HT+LT' (megajoule, CH, None)	Direct CO2 emissions	0
('ILCD 2.0 2018 midpoint', 'ecosystem quality', 'freshwater and terrestrial acidification')	'SMR BM, HT+LT' (megajoule, CH, None)	Emissions from fuel burning in furnace	3.69108e-06
('ILCD 2.0 2018 midpoint', 'ecosystem quality', 'freshwater and terrestrial acidification')	'SMR NG, HT+LT, + CCS (MDEA), 98 (upper bound)' (megajoule, CH, None)	Fuel supply chain	4.76466e-05
('ILCD 2.0 2018 midpoint', 'ecosystem quality', 'freshwater and terrestrial acidification')	'SMR NG, HT+LT, + CCS (MDEA), 98 (upper bound)' (megajoule, CH, None)	Plant infrastructure	7.8979e-06
('ILCD 2.0 2018 midpoint', 'ecosystem quality', 'freshwater and terrestrial acidification')	'SMR NG, HT+LT, + CCS (MDEA), 98 (upper bound)' (megajoule, CH, None)	Water supply	2.47392e-07
('ILCD 2.0 2018 midpoint', 'ecosystem quality', 'freshwater and terrestrial acidification')	'SMR NG, HT+LT, + CCS (MDEA), 98 (upper bound)' (megajoule, CH, None)	Electricity from/to grid	1.20443e-05
('ILCD 2.0 2018 midpoint', 'ecosystem quality', 'freshwater and terrestrial acidification')	'SMR NG, HT+LT, + CCS (MDEA), 98 (upper bound)' (megajoule, CH, None)	Catalysts&adsorbents	7.87587e-06
('ILCD 2.0 2018 midpoint', 'ecosystem quality', 'freshwater and terrestrial acidification')	'SMR NG, HT+LT, + CCS (MDEA), 98 (upper bound)' (megajoule, CH, None)	CO2 transport and storage	1.18777e-06
('ILCD 2.0 2018 midpoint', 'ecosystem quality', 'freshwater and terrestrial acidification')	'SMR NG, HT+LT, + CCS (MDEA), 98 (upper bound)' (megajoule, CH, None)	Direct CO2 emissions	0
('ILCD 2.0 2018 midpoint', 'ecosystem quality', 'freshwater and terrestrial acidification')	'SMR NG, HT+LT, + CCS (MDEA), 98 (upper bound)' (megajoule, CH, None)	Emissions from fuel burning in furnace	3.26277e-06
('ILCD 2.0 2018 midpoint', 'ecosystem quality', 'freshwater and terrestrial acidification')	'SMR NG/BM, HT+LT, 30:70 + CCS (MDEA), 98 (average), digestate incineration' (megajoule, CH, None)	Fuel supply chain	8.32437e-05
('ILCD 2.0 2018 midpoint', 'ecosystem quality', 'freshwater and terrestrial acidification')	'SMR NG/BM, HT+LT, 30:70 + CCS (MDEA), 98 (average), digestate incineration' (megajoule, CH, None)	Plant infrastructure	7.8979e-06
('ILCD 2.0 2018 midpoint', 'ecosystem quality', 'freshwater and terrestrial acidification')	'SMR NG/BM, HT+LT, 30:70 + CCS (MDEA), 98 (average), digestate incineration' (megajoule, CH, None)	Water supply	2.47392e-07
('ILCD 2.0 2018 midpoint', 'ecosystem quality', 'freshwater and terrestrial acidification')	'SMR NG/BM, HT+LT, 30:70 + CCS (MDEA), 98 (average), digestate incineration' (megajoule, CH, None)	Electricity from/to grid	1.19788e-05
('ILCD 2.0 2018 midpoint', 'ecosystem quality', 'freshwater and terrestrial acidification')	'SMR NG/BM, HT+LT, 30:70 + CCS (MDEA), 98 (average), digestate incineration' (megajoule, CH, None)	Catalysts&adsorbents	7.87587e-06
('ILCD 2.0 2018 midpoint', 'ecosystem quality', 'freshwater and terrestrial acidification')	'SMR NG/BM, HT+LT, 30:70 + CCS (MDEA), 98 (average), digestate incineration' (megajoule, CH, None)	CO2 transport and storage	1.18777e-06
('ILCD 2.0 2018 midpoint', 'ecosystem quality', 'freshwater and terrestrial acidification')	'SMR NG/BM, HT+LT, 30:70 + CCS (MDEA), 98 (average), digestate incineration' (megajoule, CH, None)	Direct CO2 emissions	0
('ILCD 2.0 2018 midpoint', 'ecosystem quality', 'freshwater and terrestrial acidification')	'SMR NG/BM, HT+LT, 30:70 + CCS (MDEA), 98 (average), digestate incineration' (megajoule, CH, None)	Emissions from fuel burning in furnace	3.26277e-06
('ILCD 2.0 2018 midpoint', 'ecosystem quality', 'freshwater and terrestrial acidification')	'SMR NG, HT+LT, + CCS (MDEA), 98 (average), 700 bar' (megajoule, CH, None)	Fuel supply chain	4.76466e-05
('ILCD 2.0 2018 midpoint', 'ecosystem quality', 'freshwater and terrestrial acidification')	'SMR NG, HT+LT, + CCS (MDEA), 98 (average), 700 bar' (megajoule, CH, None)	Plant infrastructure	7.8979e-06
('ILCD 2.0 2018 midpoint', 'ecosystem quality', 'freshwater and terrestrial acidification')	'SMR NG, HT+LT, + CCS (MDEA), 98 (average), 700 bar' (megajoule, CH, None)	Water supply	2.47392e-07
('ILCD 2.0 2018 midpoint', 'ecosystem quality', 'freshwater and terrestrial acidification')	'SMR NG, HT+LT, + CCS (MDEA), 98 (average), 700 bar' (megajoule, CH, None)	Electricity from/to grid	5.69338e-05
('ILCD 2.0 2018 midpoint', 'ecosystem quality', 'freshwater and terrestrial acidification')	'SMR NG, HT+LT, + CCS (MDEA), 98 (average), 700 bar' (megajoule, CH, None)	Catalysts&adsorbents	7.87587e-06
('ILCD 2.0 2018 midpoint', 'ecosystem quality', 'freshwater and terrestrial acidification')	'SMR NG, HT+LT, + CCS (MDEA), 98 (average), 700 bar' (megajoule, CH, None)	CO2 transport and storage	1.18777e-06
('ILCD 2.0 2018 midpoint', 'ecosystem quality', 'freshwater and terrestrial acidification')	'SMR NG, HT+LT, + CCS (MDEA), 98 (average), 700 bar' (megajoule, CH, None)	Direct CO2 emissions	0
('ILCD 2.0 2018 midpoint', 'ecosystem quality', 'freshwater and terrestrial acidification')	'SMR NG, HT+LT, + CCS (MDEA), 98 (average), 700 bar' (megajoule, CH, None)	Emissions from fuel burning in furnace	3.26277e-06
('ILCD 2.0 2018 midpoint', 'ecosystem quality', 'freshwater and terrestrial acidification')	'SMR NG/BM, HT+LT, 5:95 + CCS (MDEA), 98 (average)' (megajoule, CH, None)	Fuel supply chain	9.59569e-05
('ILCD 2.0 2018 midpoint', 'ecosystem quality', 'freshwater and terrestrial acidification')	'SMR NG/BM, HT+LT, 5:95 + CCS (MDEA), 98 (average)' (megajoule, CH, None)	Plant infrastructure	7.8979e-06
('ILCD 2.0 2018 midpoint', 'ecosystem quality', 'freshwater and terrestrial acidification')	'SMR NG/BM, HT+LT, 5:95 + CCS (MDEA), 98 (average)' (megajoule, CH, None)	Water supply	2.47392e-07
('ILCD 2.0 2018 midpoint', 'ecosystem quality', 'freshwater and terrestrial acidification')	'SMR NG/BM, HT+LT, 5:95 + CCS (MDEA), 98 (average)' (megajoule, CH, None)	Electricity from/to grid	1.19788e-05
('ILCD 2.0 2018 midpoint', 'ecosystem quality', 'freshwater and terrestrial acidification')	'SMR NG/BM, HT+LT, 5:95 + CCS (MDEA), 98 (average)' (megajoule, CH, None)	Catalysts&adsorbents	7.87587e-06
('ILCD 2.0 2018 midpoint', 'ecosystem quality', 'freshwater and terrestrial acidification')	'SMR NG/BM, HT+LT, 5:95 + CCS (MDEA), 98 (average)' (megajoule, CH, None)	CO2 transport and storage	1.18777e-06
('ILCD 2.0 2018 midpoint', 'ecosystem quality', 'freshwater and terrestrial acidification')	'SMR NG/BM, HT+LT, 5:95 + CCS (MDEA), 98 (average)' (megajoule, CH, None)	Direct CO2 emissions	0
('ILCD 2.0 2018 midpoint', 'ecosystem quality', 'freshwater and terrestrial acidification')	'SMR NG/BM, HT+LT, 5:95 + CCS (MDEA), 98 (average)' (megajoule, CH, None)	Emissions from fuel burning in furnace	3.26277e-06
('ILCD 2.0 2018 midpoint', 'ecosystem quality', 'freshwater and terrestrial acidification')	'SMR NG, HT+LT, + CCS (VPSA), 98 (upper bound)' (megajoule, CH, None)	Fuel supply chain	4.80294e-05
('ILCD 2.0 2018 midpoint', 'ecosystem quality', 'freshwater and terrestrial acidification')	'SMR NG, HT+LT, + CCS (VPSA), 98 (upper bound)' (megajoule, CH, None)	Plant infrastructure	7.89854e-06
('ILCD 2.0 2018 midpoint', 'ecosystem quality', 'freshwater and terrestrial acidification')	'SMR NG, HT+LT, + CCS (VPSA), 98 (upper bound)' (megajoule, CH, None)	Water supply	2.47413e-07
('ILCD 2.0 2018 midpoint', 'ecosystem quality', 'freshwater and terrestrial acidification')	'SMR NG, HT+LT, + CCS (VPSA), 98 (upper bound)' (megajoule, CH, None)	Electricity from/to grid	1.57268e-05
('ILCD 2.0 2018 midpoint', 'ecosystem quality', 'freshwater and terrestrial acidification')	'SMR NG, HT+LT, + CCS (VPSA), 98 (upper bound)' (megajoule, CH, None)	Catalysts&adsorbents	7.85337e-06
('ILCD 2.0 2018 midpoint', 'ecosystem quality', 'freshwater and terrestrial acidification')	'SMR NG, HT+LT, + CCS (VPSA), 98 (upper bound)' (megajoule, CH, None)	CO2 transport and storage	1.19382e-06
('ILCD 2.0 2018 midpoint', 'ecosystem quality', 'freshwater and terrestrial acidification')	'SMR NG, HT+LT, + CCS (VPSA), 98 (upper bound)' (megajoule, CH, None)	Direct CO2 emissions	0
('ILCD 2.0 2018 midpoint', 'ecosystem quality', 'freshwater and terrestrial acidification')	'SMR NG, HT+LT, + CCS (VPSA), 98 (upper bound)' (megajoule, CH, None)	Emissions from fuel burning in furnace	3.68435e-06
('ILCD 2.0 2018 midpoint', 'ecosystem quality', 'freshwater and terrestrial acidification')	'SMR BM + CCS (MDEA), 98 (upper bound)' (megajoule, CH, None)	Fuel supply chain	0.000101307
('ILCD 2.0 2018 midpoint', 'ecosystem quality', 'freshwater and terrestrial acidification')	'SMR BM + CCS (MDEA), 98 (upper bound)' (megajoule, CH, None)	Plant infrastructure	7.8988e-06
('ILCD 2.0 2018 midpoint', 'ecosystem quality', 'freshwater and terrestrial acidification')	'SMR BM + CCS (MDEA), 98 (upper bound)' (megajoule, CH, None)	Water supply	2.47421e-07
('ILCD 2.0 2018 midpoint', 'ecosystem quality', 'freshwater and terrestrial acidification')	'SMR BM + CCS (MDEA), 98 (upper bound)' (megajoule, CH, None)	Electricity from/to grid	6.80456e-06
('ILCD 2.0 2018 midpoint', 'ecosystem quality', 'freshwater and terrestrial acidification')	'SMR BM + CCS (MDEA), 98 (upper bound)' (megajoule, CH, None)	Catalysts&adsorbents	7.87256e-06
('ILCD 2.0 2018 midpoint', 'ecosystem quality', 'freshwater and terrestrial acidification')	'SMR BM + CCS (MDEA), 98 (upper bound)' (megajoule, CH, None)	CO2 transport and storage	1.01295e-06
('ILCD 2.0 2018 midpoint', 'ecosystem quality', 'freshwater and terrestrial acidification')	'SMR BM + CCS (MDEA), 98 (upper bound)' (megajoule, CH, None)	Direct CO2 emissions	0
('ILCD 2.0 2018 midpoint', 'ecosystem quality', 'freshwater and terrestrial acidification')	'SMR BM + CCS (MDEA), 98 (upper bound)' (megajoule, CH, None)	Emissions from fuel burning in furnace	2.40652e-06
('ILCD 2.0 2018 midpoint', 'ecosystem quality', 'freshwater and terrestrial acidification')	'SMR BM, HT+LT, + CCS (VPSA), 98 (average), upper bound C sequestration' (megajoule, CH, None)	Fuel supply chain	0.000101577
('ILCD 2.0 2018 midpoint', 'ecosystem quality', 'freshwater and terrestrial acidification')	'SMR BM, HT+LT, + CCS (VPSA), 98 (average), upper bound C sequestration' (megajoule, CH, None)	Plant infrastructure	7.89907e-06
('ILCD 2.0 2018 midpoint', 'ecosystem quality', 'freshwater and terrestrial acidification')	'SMR BM, HT+LT, + CCS (VPSA), 98 (average), upper bound C sequestration' (megajoule, CH, None)	Water supply	2.4743e-07
('ILCD 2.0 2018 midpoint', 'ecosystem quality', 'freshwater and terrestrial acidification')	'SMR BM, HT+LT, + CCS (VPSA), 98 (average), upper bound C sequestration' (megajoule, CH, None)	Electricity from/to grid	1.38121e-05
('ILCD 2.0 2018 midpoint', 'ecosystem quality', 'freshwater and terrestrial acidification')	'SMR BM, HT+LT, + CCS (VPSA), 98 (average), upper bound C sequestration' (megajoule, CH, None)	Catalysts&adsorbents	7.85337e-06
('ILCD 2.0 2018 midpoint', 'ecosystem quality', 'freshwater and terrestrial acidification')	'SMR BM, HT+LT, + CCS (VPSA), 98 (average), upper bound C sequestration' (megajoule, CH, None)	CO2 transport and storage	1.17893e-06
('ILCD 2.0 2018 midpoint', 'ecosystem quality', 'freshwater and terrestrial acidification')	'SMR BM, HT+LT, + CCS (VPSA), 98 (average), upper bound C sequestration' (megajoule, CH, None)	Direct CO2 emissions	0
('ILCD 2.0 2018 midpoint', 'ecosystem quality', 'freshwater and terrestrial acidification')	'SMR BM, HT+LT, + CCS (VPSA), 98 (average), upper bound C sequestration' (megajoule, CH, None)	Emissions from fuel burning in furnace	3.75604e-06
('ILCD 2.0 2018 midpoint', 'ecosystem quality', 'freshwater and terrestrial acidification')	'SMR BM, HT+LT, cut-off approach' (megajoule, CH, None)	Fuel supply chain	0.000103004
('ILCD 2.0 2018 midpoint', 'ecosystem quality', 'freshwater and terrestrial acidification')	'SMR BM, HT+LT, cut-off approach' (megajoule, CH, None)	Plant infrastructure	7.89879e-06
('ILCD 2.0 2018 midpoint', 'ecosystem quality', 'freshwater and terrestrial acidification')	'SMR BM, HT+LT, cut-off approach' (megajoule, CH, None)	Water supply	2.47421e-07
('ILCD 2.0 2018 midpoint', 'ecosystem quality', 'freshwater and terrestrial acidification')	'SMR BM, HT+LT, cut-off approach' (megajoule, CH, None)	Electricity from/to grid	-9.79136e-07
('ILCD 2.0 2018 midpoint', 'ecosystem quality', 'freshwater and terrestrial acidification')	'SMR BM, HT+LT, cut-off approach' (megajoule, CH, None)	Catalysts&adsorbents	7.85337e-06
('ILCD 2.0 2018 midpoint', 'ecosystem quality', 'freshwater and terrestrial acidification')	'SMR BM, HT+LT, cut-off approach' (megajoule, CH, None)	Direct CO2 emissions	0
('ILCD 2.0 2018 midpoint', 'ecosystem quality', 'freshwater and terrestrial acidification')	'SMR BM, HT+LT, cut-off approach' (megajoule, CH, None)	Emissions from fuel burning in furnace	3.69108e-06
('ILCD 2.0 2018 midpoint', 'ecosystem quality', 'freshwater and terrestrial acidification')	'SMR BM, HT+LT, + CCS (VPSA), 98 (average)' (megajoule, CH, None)	Fuel supply chain	0.000101577
('ILCD 2.0 2018 midpoint', 'ecosystem quality', 'freshwater and terrestrial acidification')	'SMR BM, HT+LT, + CCS (VPSA), 98 (average)' (megajoule, CH, None)	Plant infrastructure	7.89907e-06
('ILCD 2.0 2018 midpoint', 'ecosystem quality', 'freshwater and terrestrial acidification')	'SMR BM, HT+LT, + CCS (VPSA), 98 (average)' (megajoule, CH, None)	Water supply	2.4743e-07
('ILCD 2.0 2018 midpoint', 'ecosystem quality', 'freshwater and terrestrial acidification')	'SMR BM, HT+LT, + CCS (VPSA), 98 (average)' (megajoule, CH, None)	Electricity from/to grid	1.38121e-05
('ILCD 2.0 2018 midpoint', 'ecosystem quality', 'freshwater and terrestrial acidification')	'SMR BM, HT+LT, + CCS (VPSA), 98 (average)' (megajoule, CH, None)	Catalysts&adsorbents	7.85337e-06
('ILCD 2.0 2018 midpoint', 'ecosystem quality', 'freshwater and terrestrial acidification')	'SMR BM, HT+LT, + CCS (VPSA), 98 (average)' (megajoule, CH, None)	CO2 transport and storage	1.17893e-06
('ILCD 2.0 2018 midpoint', 'ecosystem quality', 'freshwater and terrestrial acidification')	'SMR BM, HT+LT, + CCS (VPSA), 98 (average)' (megajoule, CH, None)	Direct CO2 emissions	0
('ILCD 2.0 2018 midpoint', 'ecosystem quality', 'freshwater and terrestrial acidification')	'SMR BM, HT+LT, + CCS (VPSA), 98 (average)' (megajoule, CH, None)	Emissions from fuel burning in furnace	3.75604e-06
('ILCD 2.0 2018 midpoint', 'ecosystem quality', 'freshwater and terrestrial acidification')	'SMR NG, HT+LT' (megajoule, CH, None)	Fuel supply chain	4.84694e-05
('ILCD 2.0 2018 midpoint', 'ecosystem quality', 'freshwater and terrestrial acidification')	'SMR NG, HT+LT' (megajoule, CH, None)	Plant infrastructure	7.89879e-06
('ILCD 2.0 2018 midpoint', 'ecosystem quality', 'freshwater and terrestrial acidification')	'SMR NG, HT+LT' (megajoule, CH, None)	Water supply	2.47421e-07
('ILCD 2.0 2018 midpoint', 'ecosystem quality', 'freshwater and terrestrial acidification')	'SMR NG, HT+LT' (megajoule, CH, None)	Electricity from/to grid	2.16733e-07
('ILCD 2.0 2018 midpoint', 'ecosystem quality', 'freshwater and terrestrial acidification')	'SMR NG, HT+LT' (megajoule, CH, None)	Catalysts&adsorbents	7.85337e-06
('ILCD 2.0 2018 midpoint', 'ecosystem quality', 'freshwater and terrestrial acidification')	'SMR NG, HT+LT' (megajoule, CH, None)	Direct CO2 emissions	0
('ILCD 2.0 2018 midpoint', 'ecosystem quality', 'freshwater and terrestrial acidification')	'SMR NG, HT+LT' (megajoule, CH, None)	Emissions from fuel burning in furnace	3.57046e-06
('ILCD 2.0 2018 midpoint', 'ecosystem quality', 'freshwater and terrestrial acidification')	'SMR NG/BM, HT+LT, 40:60 + CCS (MDEA), 98 (average)' (megajoule, CH, None)	Fuel supply chain	7.81584e-05
('ILCD 2.0 2018 midpoint', 'ecosystem quality', 'freshwater and terrestrial acidification')	'SMR NG/BM, HT+LT, 40:60 + CCS (MDEA), 98 (average)' (megajoule, CH, None)	Plant infrastructure	7.8979e-06
('ILCD 2.0 2018 midpoint', 'ecosystem quality', 'freshwater and terrestrial acidification')	'SMR NG/BM, HT+LT, 40:60 + CCS (MDEA), 98 (average)' (megajoule, CH, None)	Water supply	2.47392e-07
('ILCD 2.0 2018 midpoint', 'ecosystem quality', 'freshwater and terrestrial acidification')	'SMR NG/BM, HT+LT, 40:60 + CCS (MDEA), 98 (average)' (megajoule, CH, None)	Electricity from/to grid	1.19788e-05
('ILCD 2.0 2018 midpoint', 'ecosystem quality', 'freshwater and terrestrial acidification')	'SMR NG/BM, HT+LT, 40:60 + CCS (MDEA), 98 (average)' (megajoule, CH, None)	Catalysts&adsorbents	7.87587e-06
('ILCD 2.0 2018 midpoint', 'ecosystem quality', 'freshwater and terrestrial acidification')	'SMR NG/BM, HT+LT, 40:60 + CCS (MDEA), 98 (average)' (megajoule, CH, None)	CO2 transport and storage	1.18777e-06
('ILCD 2.0 2018 midpoint', 'ecosystem quality', 'freshwater and terrestrial acidification')	'SMR NG/BM, HT+LT, 40:60 + CCS (MDEA), 98 (average)' (megajoule, CH, None)	Direct CO2 emissions	0
('ILCD 2.0 2018 midpoint', 'ecosystem quality', 'freshwater and terrestrial acidification')	'SMR NG/BM, HT+LT, 40:60 + CCS (MDEA), 98 (average)' (megajoule, CH, None)	Emissions from fuel burning in furnace	3.26277e-06
('ILCD 2.0 2018 midpoint', 'ecosystem quality', 'freshwater and terrestrial acidification')	'SMR NG' (megajoule, CH, None)	Fuel supply chain	4.81737e-05
('ILCD 2.0 2018 midpoint', 'ecosystem quality', 'freshwater and terrestrial acidification')	'SMR NG' (megajoule, CH, None)	Plant infrastructure	7.89879e-06
('ILCD 2.0 2018 midpoint', 'ecosystem quality', 'freshwater and terrestrial acidification')	'SMR NG' (megajoule, CH, None)	Water supply	2.47421e-07
('ILCD 2.0 2018 midpoint', 'ecosystem quality', 'freshwater and terrestrial acidification')	'SMR NG' (megajoule, CH, None)	Electricity from/to grid	-2.41826e-06
('ILCD 2.0 2018 midpoint', 'ecosystem quality', 'freshwater and terrestrial acidification')	'SMR NG' (megajoule, CH, None)	Catalysts&adsorbents	7.85337e-06
('ILCD 2.0 2018 midpoint', 'ecosystem quality', 'freshwater and terrestrial acidification')	'SMR NG' (megajoule, CH, None)	Direct CO2 emissions	0
('ILCD 2.0 2018 midpoint', 'ecosystem quality', 'freshwater and terrestrial acidification')	'SMR NG' (megajoule, CH, None)	Emissions from fuel burning in furnace	2.43479e-06
('ILCD 2.0 2018 midpoint', 'ecosystem quality', 'freshwater and terrestrial acidification')	'SMR BM, HT+LT, + CCS (MDEA), 98 (upper bound)' (megajoule, CH, None)	Fuel supply chain	0.000100958
('ILCD 2.0 2018 midpoint', 'ecosystem quality', 'freshwater and terrestrial acidification')	'SMR BM, HT+LT, + CCS (MDEA), 98 (upper bound)' (megajoule, CH, None)	Plant infrastructure	7.89882e-06
('ILCD 2.0 2018 midpoint', 'ecosystem quality', 'freshwater and terrestrial acidification')	'SMR BM, HT+LT, + CCS (MDEA), 98 (upper bound)' (megajoule, CH, None)	Water supply	2.47422e-07
('ILCD 2.0 2018 midpoint', 'ecosystem quality', 'freshwater and terrestrial acidification')	'SMR BM, HT+LT, + CCS (MDEA), 98 (upper bound)' (megajoule, CH, None)	Electricity from/to grid	1.15854e-05
('ILCD 2.0 2018 midpoint', 'ecosystem quality', 'freshwater and terrestrial acidification')	'SMR BM, HT+LT, + CCS (MDEA), 98 (upper bound)' (megajoule, CH, None)	Catalysts&adsorbents	7.87583e-06
('ILCD 2.0 2018 midpoint', 'ecosystem quality', 'freshwater and terrestrial acidification')	'SMR BM, HT+LT, + CCS (MDEA), 98 (upper bound)' (megajoule, CH, None)	CO2 transport and storage	1.18555e-06
('ILCD 2.0 2018 midpoint', 'ecosystem quality', 'freshwater and terrestrial acidification')	'SMR BM, HT+LT, + CCS (MDEA), 98 (upper bound)' (megajoule, CH, None)	Direct CO2 emissions	0
('ILCD 2.0 2018 midpoint', 'ecosystem quality', 'freshwater and terrestrial acidification')	'SMR BM, HT+LT, + CCS (MDEA), 98 (upper bound)' (megajoule, CH, None)	Emissions from fuel burning in furnace	3.32751e-06
('ILCD 2.0 2018 midpoint', 'ecosystem quality', 'freshwater and terrestrial acidification')	'SMR NG/BM, HT+LT, 65:35 + CCS (MDEA), 98 (average)' (megajoule, CH, None)	Fuel supply chain	6.54451e-05
('ILCD 2.0 2018 midpoint', 'ecosystem quality', 'freshwater and terrestrial acidification')	'SMR NG/BM, HT+LT, 65:35 + CCS (MDEA), 98 (average)' (megajoule, CH, None)	Plant infrastructure	7.8979e-06
('ILCD 2.0 2018 midpoint', 'ecosystem quality', 'freshwater and terrestrial acidification')	'SMR NG/BM, HT+LT, 65:35 + CCS (MDEA), 98 (average)' (megajoule, CH, None)	Water supply	2.47392e-07
('ILCD 2.0 2018 midpoint', 'ecosystem quality', 'freshwater and terrestrial acidification')	'SMR NG/BM, HT+LT, 65:35 + CCS (MDEA), 98 (average)' (megajoule, CH, None)	Electricity from/to grid	1.19788e-05
('ILCD 2.0 2018 midpoint', 'ecosystem quality', 'freshwater and terrestrial acidification')	'SMR NG/BM, HT+LT, 65:35 + CCS (MDEA), 98 (average)' (megajoule, CH, None)	Catalysts&adsorbents	7.87587e-06
('ILCD 2.0 2018 midpoint', 'ecosystem quality', 'freshwater and terrestrial acidification')	'SMR NG/BM, HT+LT, 65:35 + CCS (MDEA), 98 (average)' (megajoule, CH, None)	CO2 transport and storage	1.18777e-06
('ILCD 2.0 2018 midpoint', 'ecosystem quality', 'freshwater and terrestrial acidification')	'SMR NG/BM, HT+LT, 65:35 + CCS (MDEA), 98 (average)' (megajoule, CH, None)	Direct CO2 emissions	0
('ILCD 2.0 2018 midpoint', 'ecosystem quality', 'freshwater and terrestrial acidification')	'SMR NG/BM, HT+LT, 65:35 + CCS (MDEA), 98 (average)' (megajoule, CH, None)	Emissions from fuel burning in furnace	3.26277e-06
('ILCD 2.0 2018 midpoint', 'ecosystem quality', 'freshwater and terrestrial acidification')	'SMR NG + CCS (MDEA), 90 (upper bound)' (megajoule, CH, None)	Fuel supply chain	4.80004e-05
('ILCD 2.0 2018 midpoint', 'ecosystem quality', 'freshwater and terrestrial acidification')	'SMR NG + CCS (MDEA), 90 (upper bound)' (megajoule, CH, None)	Plant infrastructure	7.89889e-06
('ILCD 2.0 2018 midpoint', 'ecosystem quality', 'freshwater and terrestrial acidification')	'SMR NG + CCS (MDEA), 90 (upper bound)' (megajoule, CH, None)	Water supply	2.47424e-07
('ILCD 2.0 2018 midpoint', 'ecosystem quality', 'freshwater and terrestrial acidification')	'SMR NG + CCS (MDEA), 90 (upper bound)' (megajoule, CH, None)	Electricity from/to grid	4.55773e-06
('ILCD 2.0 2018 midpoint', 'ecosystem quality', 'freshwater and terrestrial acidification')	'SMR NG + CCS (MDEA), 90 (upper bound)' (megajoule, CH, None)	Catalysts&adsorbents	7.87096e-06
('ILCD 2.0 2018 midpoint', 'ecosystem quality', 'freshwater and terrestrial acidification')	'SMR NG + CCS (MDEA), 90 (upper bound)' (megajoule, CH, None)	CO2 transport and storage	9.28671e-07
('ILCD 2.0 2018 midpoint', 'ecosystem quality', 'freshwater and terrestrial acidification')	'SMR NG + CCS (MDEA), 90 (upper bound)' (megajoule, CH, None)	Direct CO2 emissions	0
('ILCD 2.0 2018 midpoint', 'ecosystem quality', 'freshwater and terrestrial acidification')	'SMR NG + CCS (MDEA), 90 (upper bound)' (megajoule, CH, None)	Emissions from fuel burning in furnace	2.36934e-06
('ILCD 2.0 2018 midpoint', 'ecosystem quality', 'freshwater and terrestrial acidification')	'SMR BM, HT+LT, + CCS (MDEA), 90 (average)' (megajoule, CH, None)	Fuel supply chain	0.000101157
('ILCD 2.0 2018 midpoint', 'ecosystem quality', 'freshwater and terrestrial acidification')	'SMR BM, HT+LT, + CCS (MDEA), 90 (average)' (megajoule, CH, None)	Plant infrastructure	7.89882e-06
('ILCD 2.0 2018 midpoint', 'ecosystem quality', 'freshwater and terrestrial acidification')	'SMR BM, HT+LT, + CCS (MDEA), 90 (average)' (megajoule, CH, None)	Water supply	2.47422e-07
('ILCD 2.0 2018 midpoint', 'ecosystem quality', 'freshwater and terrestrial acidification')	'SMR BM, HT+LT, + CCS (MDEA), 90 (average)' (megajoule, CH, None)	Electricity from/to grid	9.8296e-06
('ILCD 2.0 2018 midpoint', 'ecosystem quality', 'freshwater and terrestrial acidification')	'SMR BM, HT+LT, + CCS (MDEA), 90 (average)' (megajoule, CH, None)	Catalysts&adsorbents	7.87401e-06
('ILCD 2.0 2018 midpoint', 'ecosystem quality', 'freshwater and terrestrial acidification')	'SMR BM, HT+LT, + CCS (MDEA), 90 (average)' (megajoule, CH, None)	CO2 transport and storage	1.08958e-06
('ILCD 2.0 2018 midpoint', 'ecosystem quality', 'freshwater and terrestrial acidification')	'SMR BM, HT+LT, + CCS (MDEA), 90 (average)' (megajoule, CH, None)	Direct CO2 emissions	0
('ILCD 2.0 2018 midpoint', 'ecosystem quality', 'freshwater and terrestrial acidification')	'SMR BM, HT+LT, + CCS (MDEA), 90 (average)' (megajoule, CH, None)	Emissions from fuel burning in furnace	3.36294e-06
('ILCD 2.0 2018 midpoint', 'ecosystem quality', 'freshwater and terrestrial acidification')	'SMR BM, HT+LT, +CCS (VPSA), 98 (average), hydropower electricity' (megajoule, CH, None)	Fuel supply chain	0.000101577
('ILCD 2.0 2018 midpoint', 'ecosystem quality', 'freshwater and terrestrial acidification')	'SMR BM, HT+LT, +CCS (VPSA), 98 (average), hydropower electricity' (megajoule, CH, None)	Plant infrastructure	7.89907e-06
('ILCD 2.0 2018 midpoint', 'ecosystem quality', 'freshwater and terrestrial acidification')	'SMR BM, HT+LT, +CCS (VPSA), 98 (average), hydropower electricity' (megajoule, CH, None)	Water supply	2.4743e-07
('ILCD 2.0 2018 midpoint', 'ecosystem quality', 'freshwater and terrestrial acidification')	'SMR BM, HT+LT, +CCS (VPSA), 98 (average), hydropower electricity' (megajoule, CH, None)	Electricity from/to grid	1.61316e-07
('ILCD 2.0 2018 midpoint', 'ecosystem quality', 'freshwater and terrestrial acidification')	'SMR BM, HT+LT, +CCS (VPSA), 98 (average), hydropower electricity' (megajoule, CH, None)	Catalysts&adsorbents	7.85337e-06
('ILCD 2.0 2018 midpoint', 'ecosystem quality', 'freshwater and terrestrial acidification')	'SMR BM, HT+LT, +CCS (VPSA), 98 (average), hydropower electricity' (megajoule, CH, None)	CO2 transport and storage	1.17893e-06
('ILCD 2.0 2018 midpoint', 'ecosystem quality', 'freshwater and terrestrial acidification')	'SMR BM, HT+LT, +CCS (VPSA), 98 (average), hydropower electricity' (megajoule, CH, None)	Direct CO2 emissions	0
('ILCD 2.0 2018 midpoint', 'ecosystem quality', 'freshwater and terrestrial acidification')	'SMR BM, HT+LT, +CCS (VPSA), 98 (average), hydropower electricity' (megajoule, CH, None)	Emissions from fuel burning in furnace	3.75604e-06
('ILCD 2.0 2018 midpoint', 'ecosystem quality', 'freshwater and terrestrial acidification')	'SMR BM, HT+LT, + CCS (MDEA), 90 (upper bound)' (megajoule, CH, None)	Fuel supply chain	0.000101157
('ILCD 2.0 2018 midpoint', 'ecosystem quality', 'freshwater and terrestrial acidification')	'SMR BM, HT+LT, + CCS (MDEA), 90 (upper bound)' (megajoule, CH, None)	Plant infrastructure	7.89882e-06
('ILCD 2.0 2018 midpoint', 'ecosystem quality', 'freshwater and terrestrial acidification')	'SMR BM, HT+LT, + CCS (MDEA), 90 (upper bound)' (megajoule, CH, None)	Water supply	2.47422e-07
('ILCD 2.0 2018 midpoint', 'ecosystem quality', 'freshwater and terrestrial acidification')	'SMR BM, HT+LT, + CCS (MDEA), 90 (upper bound)' (megajoule, CH, None)	Electricity from/to grid	9.89881e-06
('ILCD 2.0 2018 midpoint', 'ecosystem quality', 'freshwater and terrestrial acidification')	'SMR BM, HT+LT, + CCS (MDEA), 90 (upper bound)' (megajoule, CH, None)	Catalysts&adsorbents	7.87401e-06
('ILCD 2.0 2018 midpoint', 'ecosystem quality', 'freshwater and terrestrial acidification')	'SMR BM, HT+LT, + CCS (MDEA), 90 (upper bound)' (megajoule, CH, None)	CO2 transport and storage	1.08958e-06
('ILCD 2.0 2018 midpoint', 'ecosystem quality', 'freshwater and terrestrial acidification')	'SMR BM, HT+LT, + CCS (MDEA), 90 (upper bound)' (megajoule, CH, None)	Direct CO2 emissions	0
('ILCD 2.0 2018 midpoint', 'ecosystem quality', 'freshwater and terrestrial acidification')	'SMR BM, HT+LT, + CCS (MDEA), 90 (upper bound)' (megajoule, CH, None)	Emissions from fuel burning in furnace	3.36294e-06
('ILCD 2.0 2018 midpoint', 'ecosystem quality', 'freshwater and terrestrial acidification')	'SMR NG + CCS (VPSA), 98 (average)' (megajoule, CH, None)	Fuel supply chain	4.79995e-05
('ILCD 2.0 2018 midpoint', 'ecosystem quality', 'freshwater and terrestrial acidification')	'SMR NG + CCS (VPSA), 98 (average)' (megajoule, CH, None)	Plant infrastructure	7.8989e-06
('ILCD 2.0 2018 midpoint', 'ecosystem quality', 'freshwater and terrestrial acidification')	'SMR NG + CCS (VPSA), 98 (average)' (megajoule, CH, None)	Water supply	2.47424e-07
('ILCD 2.0 2018 midpoint', 'ecosystem quality', 'freshwater and terrestrial acidification')	'SMR NG + CCS (VPSA), 98 (average)' (megajoule, CH, None)	Electricity from/to grid	1.24448e-05
('ILCD 2.0 2018 midpoint', 'ecosystem quality', 'freshwater and terrestrial acidification')	'SMR NG + CCS (VPSA), 98 (average)' (megajoule, CH, None)	Catalysts&adsorbents	7.85337e-06
('ILCD 2.0 2018 midpoint', 'ecosystem quality', 'freshwater and terrestrial acidification')	'SMR NG + CCS (VPSA), 98 (average)' (megajoule, CH, None)	CO2 transport and storage	1.01548e-06
('ILCD 2.0 2018 midpoint', 'ecosystem quality', 'freshwater and terrestrial acidification')	'SMR NG + CCS (VPSA), 98 (average)' (megajoule, CH, None)	Direct CO2 emissions	0
('ILCD 2.0 2018 midpoint', 'ecosystem quality', 'freshwater and terrestrial acidification')	'SMR NG + CCS (VPSA), 98 (average)' (megajoule, CH, None)	Emissions from fuel burning in furnace	2.5215e-06
('ILCD 2.0 2018 midpoint', 'ecosystem quality', 'freshwater and terrestrial acidification')	'SMR BM, HT+LT, + CCS (VPSA), 98 (average), digestate incineration' (megajoule, CH, None)	Fuel supply chain	0.000101577
('ILCD 2.0 2018 midpoint', 'ecosystem quality', 'freshwater and terrestrial acidification')	'SMR BM, HT+LT, + CCS (VPSA), 98 (average), digestate incineration' (megajoule, CH, None)	Plant infrastructure	7.89907e-06
('ILCD 2.0 2018 midpoint', 'ecosystem quality', 'freshwater and terrestrial acidification')	'SMR BM, HT+LT, + CCS (VPSA), 98 (average), digestate incineration' (megajoule, CH, None)	Water supply	2.4743e-07
('ILCD 2.0 2018 midpoint', 'ecosystem quality', 'freshwater and terrestrial acidification')	'SMR BM, HT+LT, + CCS (VPSA), 98 (average), digestate incineration' (megajoule, CH, None)	Electricity from/to grid	1.38121e-05
('ILCD 2.0 2018 midpoint', 'ecosystem quality', 'freshwater and terrestrial acidification')	'SMR BM, HT+LT, + CCS (VPSA), 98 (average), digestate incineration' (megajoule, CH, None)	Catalysts&adsorbents	7.85337e-06
('ILCD 2.0 2018 midpoint', 'ecosystem quality', 'freshwater and terrestrial acidification')	'SMR BM, HT+LT, + CCS (VPSA), 98 (average), digestate incineration' (megajoule, CH, None)	CO2 transport and storage	1.17893e-06
('ILCD 2.0 2018 midpoint', 'ecosystem quality', 'freshwater and terrestrial acidification')	'SMR BM, HT+LT, + CCS (VPSA), 98 (average), digestate incineration' (megajoule, CH, None)	Direct CO2 emissions	0
('ILCD 2.0 2018 midpoint', 'ecosystem quality', 'freshwater and terrestrial acidification')	'SMR BM, HT+LT, + CCS (VPSA), 98 (average), digestate incineration' (megajoule, CH, None)	Emissions from fuel burning in furnace	3.75604e-06
('ILCD 2.0 2018 midpoint', 'ecosystem quality', 'freshwater and terrestrial acidification')	'SMR NG, HT+LT, + CCS (MDEA), 98 (average)' (megajoule, CH, None)	Fuel supply chain	4.76466e-05
('ILCD 2.0 2018 midpoint', 'ecosystem quality', 'freshwater and terrestrial acidification')	'SMR NG, HT+LT, + CCS (MDEA), 98 (average)' (megajoule, CH, None)	Plant infrastructure	7.8979e-06
('ILCD 2.0 2018 midpoint', 'ecosystem quality', 'freshwater and terrestrial acidification')	'SMR NG, HT+LT, + CCS (MDEA), 98 (average)' (megajoule, CH, None)	Water supply	2.47392e-07
('ILCD 2.0 2018 midpoint', 'ecosystem quality', 'freshwater and terrestrial acidification')	'SMR NG, HT+LT, + CCS (MDEA), 98 (average)' (megajoule, CH, None)	Electricity from/to grid	1.19788e-05
('ILCD 2.0 2018 midpoint', 'ecosystem quality', 'freshwater and terrestrial acidification')	'SMR NG, HT+LT, + CCS (MDEA), 98 (average)' (megajoule, CH, None)	Catalysts&adsorbents	7.87587e-06
('ILCD 2.0 2018 midpoint', 'ecosystem quality', 'freshwater and terrestrial acidification')	'SMR NG, HT+LT, + CCS (MDEA), 98 (average)' (megajoule, CH, None)	CO2 transport and storage	1.18777e-06
('ILCD 2.0 2018 midpoint', 'ecosystem quality', 'freshwater and terrestrial acidification')	'SMR NG, HT+LT, + CCS (MDEA), 98 (average)' (megajoule, CH, None)	Direct CO2 emissions	0
('ILCD 2.0 2018 midpoint', 'ecosystem quality', 'freshwater and terrestrial acidification')	'SMR NG, HT+LT, + CCS (MDEA), 98 (average)' (megajoule, CH, None)	Emissions from fuel burning in furnace	3.26277e-06
('ILCD 2.0 2018 midpoint', 'ecosystem quality', 'freshwater and terrestrial acidification')	'SMR NG + CCS (MDEA), 90 (lower bound)' (megajoule, CH, None)	Fuel supply chain	4.80004e-05
('ILCD 2.0 2018 midpoint', 'ecosystem quality', 'freshwater and terrestrial acidification')	'SMR NG + CCS (MDEA), 90 (lower bound)' (megajoule, CH, None)	Plant infrastructure	7.89889e-06
('ILCD 2.0 2018 midpoint', 'ecosystem quality', 'freshwater and terrestrial acidification')	'SMR NG + CCS (MDEA), 90 (lower bound)' (megajoule, CH, None)	Water supply	2.47424e-07
('ILCD 2.0 2018 midpoint', 'ecosystem quality', 'freshwater and terrestrial acidification')	'SMR NG + CCS (MDEA), 90 (lower bound)' (megajoule, CH, None)	Electricity from/to grid	4.41885e-06
('ILCD 2.0 2018 midpoint', 'ecosystem quality', 'freshwater and terrestrial acidification')	'SMR NG + CCS (MDEA), 90 (lower bound)' (megajoule, CH, None)	Catalysts&adsorbents	7.87096e-06
('ILCD 2.0 2018 midpoint', 'ecosystem quality', 'freshwater and terrestrial acidification')	'SMR NG + CCS (MDEA), 90 (lower bound)' (megajoule, CH, None)	CO2 transport and storage	9.28671e-07
('ILCD 2.0 2018 midpoint', 'ecosystem quality', 'freshwater and terrestrial acidification')	'SMR NG + CCS (MDEA), 90 (lower bound)' (megajoule, CH, None)	Direct CO2 emissions	0
('ILCD 2.0 2018 midpoint', 'ecosystem quality', 'freshwater and terrestrial acidification')	'SMR NG + CCS (MDEA), 90 (lower bound)' (megajoule, CH, None)	Emissions from fuel burning in furnace	2.36934e-06
('ILCD 2.0 2018 midpoint', 'ecosystem quality', 'freshwater and terrestrial acidification')	'SMR NG/BM, HT+LT, 60:40 + CCS (MDEA), 98 (average), digestate incineration' (megajoule, CH, None)	Fuel supply chain	6.79878e-05
('ILCD 2.0 2018 midpoint', 'ecosystem quality', 'freshwater and terrestrial acidification')	'SMR NG/BM, HT+LT, 60:40 + CCS (MDEA), 98 (average), digestate incineration' (megajoule, CH, None)	Plant infrastructure	7.8979e-06
('ILCD 2.0 2018 midpoint', 'ecosystem quality', 'freshwater and terrestrial acidification')	'SMR NG/BM, HT+LT, 60:40 + CCS (MDEA), 98 (average), digestate incineration' (megajoule, CH, None)	Water supply	2.47392e-07
('ILCD 2.0 2018 midpoint', 'ecosystem quality', 'freshwater and terrestrial acidification')	'SMR NG/BM, HT+LT, 60:40 + CCS (MDEA), 98 (average), digestate incineration' (megajoule, CH, None)	Electricity from/to grid	1.19788e-05
('ILCD 2.0 2018 midpoint', 'ecosystem quality', 'freshwater and terrestrial acidification')	'SMR NG/BM, HT+LT, 60:40 + CCS (MDEA), 98 (average), digestate incineration' (megajoule, CH, None)	Catalysts&adsorbents	7.87587e-06
('ILCD 2.0 2018 midpoint', 'ecosystem quality', 'freshwater and terrestrial acidification')	'SMR NG/BM, HT+LT, 60:40 + CCS (MDEA), 98 (average), digestate incineration' (megajoule, CH, None)	CO2 transport and storage	1.18777e-06
('ILCD 2.0 2018 midpoint', 'ecosystem quality', 'freshwater and terrestrial acidification')	'SMR NG/BM, HT+LT, 60:40 + CCS (MDEA), 98 (average), digestate incineration' (megajoule, CH, None)	Direct CO2 emissions	0
('ILCD 2.0 2018 midpoint', 'ecosystem quality', 'freshwater and terrestrial acidification')	'SMR NG/BM, HT+LT, 60:40 + CCS (MDEA), 98 (average), digestate incineration' (megajoule, CH, None)	Emissions from fuel burning in furnace	3.26277e-06
('ILCD 2.0 2018 midpoint', 'ecosystem quality', 'freshwater and terrestrial acidification')	'SMR BM + CCS (MDEA), 90 (average)' (megajoule, CH, None)	Fuel supply chain	0.000101708
('ILCD 2.0 2018 midpoint', 'ecosystem quality', 'freshwater and terrestrial acidification')	'SMR BM + CCS (MDEA), 90 (average)' (megajoule, CH, None)	Plant infrastructure	7.8984e-06
('ILCD 2.0 2018 midpoint', 'ecosystem quality', 'freshwater and terrestrial acidification')	'SMR BM + CCS (MDEA), 90 (average)' (megajoule, CH, None)	Water supply	2.47409e-07
('ILCD 2.0 2018 midpoint', 'ecosystem quality', 'freshwater and terrestrial acidification')	'SMR BM + CCS (MDEA), 90 (average)' (megajoule, CH, None)	Electricity from/to grid	4.36023e-06
('ILCD 2.0 2018 midpoint', 'ecosystem quality', 'freshwater and terrestrial acidification')	'SMR BM + CCS (MDEA), 90 (average)' (megajoule, CH, None)	Catalysts&adsorbents	7.871e-06
('ILCD 2.0 2018 midpoint', 'ecosystem quality', 'freshwater and terrestrial acidification')	'SMR BM + CCS (MDEA), 90 (average)' (megajoule, CH, None)	CO2 transport and storage	9.30511e-07
('ILCD 2.0 2018 midpoint', 'ecosystem quality', 'freshwater and terrestrial acidification')	'SMR BM + CCS (MDEA), 90 (average)' (megajoule, CH, None)	Direct CO2 emissions	0
('ILCD 2.0 2018 midpoint', 'ecosystem quality', 'freshwater and terrestrial acidification')	'SMR BM + CCS (MDEA), 90 (average)' (megajoule, CH, None)	Emissions from fuel burning in furnace	2.47853e-06
('ILCD 2.0 2018 midpoint', 'ecosystem quality', 'freshwater and terrestrial acidification')	'SMR NG, HT+LT, + CCS (MDEA), 98 (average), 25 bar' (megajoule, CH, None)	Fuel supply chain	4.76466e-05
('ILCD 2.0 2018 midpoint', 'ecosystem quality', 'freshwater and terrestrial acidification')	'SMR NG, HT+LT, + CCS (MDEA), 98 (average), 25 bar' (megajoule, CH, None)	Plant infrastructure	7.8979e-06
('ILCD 2.0 2018 midpoint', 'ecosystem quality', 'freshwater and terrestrial acidification')	'SMR NG, HT+LT, + CCS (MDEA), 98 (average), 25 bar' (megajoule, CH, None)	Water supply	2.47392e-07
('ILCD 2.0 2018 midpoint', 'ecosystem quality', 'freshwater and terrestrial acidification')	'SMR NG, HT+LT, + CCS (MDEA), 98 (average), 25 bar' (megajoule, CH, None)	Electricity from/to grid	-9.82193e-06
('ILCD 2.0 2018 midpoint', 'ecosystem quality', 'freshwater and terrestrial acidification')	'SMR NG, HT+LT, + CCS (MDEA), 98 (average), 25 bar' (megajoule, CH, None)	Catalysts&adsorbents	7.87587e-06
('ILCD 2.0 2018 midpoint', 'ecosystem quality', 'freshwater and terrestrial acidification')	'SMR NG, HT+LT, + CCS (MDEA), 98 (average), 25 bar' (megajoule, CH, None)	CO2 transport and storage	1.18777e-06
('ILCD 2.0 2018 midpoint', 'ecosystem quality', 'freshwater and terrestrial acidification')	'SMR NG, HT+LT, + CCS (MDEA), 98 (average), 25 bar' (megajoule, CH, None)	Direct CO2 emissions	0
('ILCD 2.0 2018 midpoint', 'ecosystem quality', 'freshwater and terrestrial acidification')	'SMR NG, HT+LT, + CCS (MDEA), 98 (average), 25 bar' (megajoule, CH, None)	Emissions from fuel burning in furnace	3.26277e-06
('ILCD 2.0 2018 midpoint', 'ecosystem quality', 'freshwater and terrestrial acidification')	'SMR BM, HT+LT, + CCS (MDEA), 98 (average), upper bound C sequestration' (megajoule, CH, None)	Fuel supply chain	0.000100958
('ILCD 2.0 2018 midpoint', 'ecosystem quality', 'freshwater and terrestrial acidification')	'SMR BM, HT+LT, + CCS (MDEA), 98 (average), upper bound C sequestration' (megajoule, CH, None)	Plant infrastructure	7.89882e-06
('ILCD 2.0 2018 midpoint', 'ecosystem quality', 'freshwater and terrestrial acidification')	'SMR BM, HT+LT, + CCS (MDEA), 98 (average), upper bound C sequestration' (megajoule, CH, None)	Water supply	2.47422e-07
('ILCD 2.0 2018 midpoint', 'ecosystem quality', 'freshwater and terrestrial acidification')	'SMR BM, HT+LT, + CCS (MDEA), 98 (average), upper bound C sequestration' (megajoule, CH, None)	Electricity from/to grid	1.15048e-05
('ILCD 2.0 2018 midpoint', 'ecosystem quality', 'freshwater and terrestrial acidification')	'SMR BM, HT+LT, + CCS (MDEA), 98 (average), upper bound C sequestration' (megajoule, CH, None)	Catalysts&adsorbents	7.87583e-06
('ILCD 2.0 2018 midpoint', 'ecosystem quality', 'freshwater and terrestrial acidification')	'SMR BM, HT+LT, + CCS (MDEA), 98 (average), upper bound C sequestration' (megajoule, CH, None)	CO2 transport and storage	1.18555e-06
('ILCD 2.0 2018 midpoint', 'ecosystem quality', 'freshwater and terrestrial acidification')	'SMR BM, HT+LT, + CCS (MDEA), 98 (average), upper bound C sequestration' (megajoule, CH, None)	Direct CO2 emissions	0
('ILCD 2.0 2018 midpoint', 'ecosystem quality', 'freshwater and terrestrial acidification')	'SMR BM, HT+LT, + CCS (MDEA), 98 (average), upper bound C sequestration' (megajoule, CH, None)	Emissions from fuel burning in furnace	3.32751e-06
('ILCD 2.0 2018 midpoint', 'ecosystem quality', 'freshwater and terrestrial acidification')	'SMR BM, HT+LT, upper bound C sequestration' (megajoule, CH, None)	Fuel supply chain	0.000103004
('ILCD 2.0 2018 midpoint', 'ecosystem quality', 'freshwater and terrestrial acidification')	'SMR BM, HT+LT, upper bound C sequestration' (megajoule, CH, None)	Plant infrastructure	7.89879e-06
('ILCD 2.0 2018 midpoint', 'ecosystem quality', 'freshwater and terrestrial acidification')	'SMR BM, HT+LT, upper bound C sequestration' (megajoule, CH, None)	Water supply	2.47421e-07
('ILCD 2.0 2018 midpoint', 'ecosystem quality', 'freshwater and terrestrial acidification')	'SMR BM, HT+LT, upper bound C sequestration' (megajoule, CH, None)	Electricity from/to grid	-9.79136e-07
('ILCD 2.0 2018 midpoint', 'ecosystem quality', 'freshwater and terrestrial acidification')	'SMR BM, HT+LT, upper bound C sequestration' (megajoule, CH, None)	Catalysts&adsorbents	7.85337e-06
('ILCD 2.0 2018 midpoint', 'ecosystem quality', 'freshwater and terrestrial acidification')	'SMR BM, HT+LT, upper bound C sequestration' (megajoule, CH, None)	Direct CO2 emissions	0
('ILCD 2.0 2018 midpoint', 'ecosystem quality', 'freshwater and terrestrial acidification')	'SMR BM, HT+LT, upper bound C sequestration' (megajoule, CH, None)	Emissions from fuel burning in furnace	3.69108e-06
('ILCD 2.0 2018 midpoint', 'ecosystem quality', 'freshwater and terrestrial acidification')	'SMR BM, HT+LT, + CCS (MDEA), 98 (average)' (megajoule, CH, None)	Fuel supply chain	0.000100958
('ILCD 2.0 2018 midpoint', 'ecosystem quality', 'freshwater and terrestrial acidification')	'SMR BM, HT+LT, + CCS (MDEA), 98 (average)' (megajoule, CH, None)	Plant infrastructure	7.89882e-06
('ILCD 2.0 2018 midpoint', 'ecosystem quality', 'freshwater and terrestrial acidification')	'SMR BM, HT+LT, + CCS (MDEA), 98 (average)' (megajoule, CH, None)	Water supply	2.47422e-07
('ILCD 2.0 2018 midpoint', 'ecosystem quality', 'freshwater and terrestrial acidification')	'SMR BM, HT+LT, + CCS (MDEA), 98 (average)' (megajoule, CH, None)	Electricity from/to grid	1.15048e-05
('ILCD 2.0 2018 midpoint', 'ecosystem quality', 'freshwater and terrestrial acidification')	'SMR BM, HT+LT, + CCS (MDEA), 98 (average)' (megajoule, CH, None)	Catalysts&adsorbents	7.87583e-06
('ILCD 2.0 2018 midpoint', 'ecosystem quality', 'freshwater and terrestrial acidification')	'SMR BM, HT+LT, + CCS (MDEA), 98 (average)' (megajoule, CH, None)	CO2 transport and storage	1.18555e-06
('ILCD 2.0 2018 midpoint', 'ecosystem quality', 'freshwater and terrestrial acidification')	'SMR BM, HT+LT, + CCS (MDEA), 98 (average)' (megajoule, CH, None)	Direct CO2 emissions	0
('ILCD 2.0 2018 midpoint', 'ecosystem quality', 'freshwater and terrestrial acidification')	'SMR BM, HT+LT, + CCS (MDEA), 98 (average)' (megajoule, CH, None)	Emissions from fuel burning in furnace	3.32751e-06
('ILCD 2.0 2018 midpoint', 'ecosystem quality', 'freshwater and terrestrial acidification')	'SMR BM + CCS (VPSA), 98 (average)' (megajoule, CH, None)	Fuel supply chain	0.000102305
('ILCD 2.0 2018 midpoint', 'ecosystem quality', 'freshwater and terrestrial acidification')	'SMR BM + CCS (VPSA), 98 (average)' (megajoule, CH, None)	Plant infrastructure	7.89862e-06
('ILCD 2.0 2018 midpoint', 'ecosystem quality', 'freshwater and terrestrial acidification')	'SMR BM + CCS (VPSA), 98 (average)' (megajoule, CH, None)	Water supply	2.47415e-07
('ILCD 2.0 2018 midpoint', 'ecosystem quality', 'freshwater and terrestrial acidification')	'SMR BM + CCS (VPSA), 98 (average)' (megajoule, CH, None)	Electricity from/to grid	1.13848e-05
('ILCD 2.0 2018 midpoint', 'ecosystem quality', 'freshwater and terrestrial acidification')	'SMR BM + CCS (VPSA), 98 (average)' (megajoule, CH, None)	Catalysts&adsorbents	7.85337e-06
('ILCD 2.0 2018 midpoint', 'ecosystem quality', 'freshwater and terrestrial acidification')	'SMR BM + CCS (VPSA), 98 (average)' (megajoule, CH, None)	CO2 transport and storage	1.02176e-06
('ILCD 2.0 2018 midpoint', 'ecosystem quality', 'freshwater and terrestrial acidification')	'SMR BM + CCS (VPSA), 98 (average)' (megajoule, CH, None)	Direct CO2 emissions	0
('ILCD 2.0 2018 midpoint', 'ecosystem quality', 'freshwater and terrestrial acidification')	'SMR BM + CCS (VPSA), 98 (average)' (megajoule, CH, None)	Emissions from fuel burning in furnace	2.73819e-06
('ILCD 2.0 2018 midpoint', 'ecosystem quality', 'freshwater and terrestrial acidification')	'SMR BM, HT+LT, with digestate incineration, 26 bar' (megajoule, CH, None)	Fuel supply chain	0.000103004
('ILCD 2.0 2018 midpoint', 'ecosystem quality', 'freshwater and terrestrial acidification')	'SMR BM, HT+LT, with digestate incineration, 26 bar' (megajoule, CH, None)	Plant infrastructure	7.89879e-06
('ILCD 2.0 2018 midpoint', 'ecosystem quality', 'freshwater and terrestrial acidification')	'SMR BM, HT+LT, with digestate incineration, 26 bar' (megajoule, CH, None)	Water supply	2.47421e-07
('ILCD 2.0 2018 midpoint', 'ecosystem quality', 'freshwater and terrestrial acidification')	'SMR BM, HT+LT, with digestate incineration, 26 bar' (megajoule, CH, None)	Electricity from/to grid	-2.2782e-05
('ILCD 2.0 2018 midpoint', 'ecosystem quality', 'freshwater and terrestrial acidification')	'SMR BM, HT+LT, with digestate incineration, 26 bar' (megajoule, CH, None)	Catalysts&adsorbents	7.85337e-06
('ILCD 2.0 2018 midpoint', 'ecosystem quality', 'freshwater and terrestrial acidification')	'SMR BM, HT+LT, with digestate incineration, 26 bar' (megajoule, CH, None)	Direct CO2 emissions	0
('ILCD 2.0 2018 midpoint', 'ecosystem quality', 'freshwater and terrestrial acidification')	'SMR BM, HT+LT, with digestate incineration, 26 bar' (megajoule, CH, None)	Emissions from fuel burning in furnace	3.69108e-06
('ILCD 2.0 2018 midpoint', 'ecosystem quality', 'freshwater and terrestrial acidification')	'SMR BM, HT+LT, + CCS (VPSA), 98 (upper bound)' (megajoule, CH, None)	Fuel supply chain	0.000101734
('ILCD 2.0 2018 midpoint', 'ecosystem quality', 'freshwater and terrestrial acidification')	'SMR BM, HT+LT, + CCS (VPSA), 98 (upper bound)' (megajoule, CH, None)	Plant infrastructure	7.89896e-06
('ILCD 2.0 2018 midpoint', 'ecosystem quality', 'freshwater and terrestrial acidification')	'SMR BM, HT+LT, + CCS (VPSA), 98 (upper bound)' (megajoule, CH, None)	Water supply	2.47426e-07
('ILCD 2.0 2018 midpoint', 'ecosystem quality', 'freshwater and terrestrial acidification')	'SMR BM, HT+LT, + CCS (VPSA), 98 (upper bound)' (megajoule, CH, None)	Electricity from/to grid	1.46535e-05
('ILCD 2.0 2018 midpoint', 'ecosystem quality', 'freshwater and terrestrial acidification')	'SMR BM, HT+LT, + CCS (VPSA), 98 (upper bound)' (megajoule, CH, None)	Catalysts&adsorbents	7.85337e-06
('ILCD 2.0 2018 midpoint', 'ecosystem quality', 'freshwater and terrestrial acidification')	'SMR BM, HT+LT, + CCS (VPSA), 98 (upper bound)' (megajoule, CH, None)	CO2 transport and storage	1.18211e-06
('ILCD 2.0 2018 midpoint', 'ecosystem quality', 'freshwater and terrestrial acidification')	'SMR BM, HT+LT, + CCS (VPSA), 98 (upper bound)' (megajoule, CH, None)	Direct CO2 emissions	0
('ILCD 2.0 2018 midpoint', 'ecosystem quality', 'freshwater and terrestrial acidification')	'SMR BM, HT+LT, + CCS (VPSA), 98 (upper bound)' (megajoule, CH, None)	Emissions from fuel burning in furnace	3.57503e-06
('ILCD 2.0 2018 midpoint', 'ecosystem quality', 'freshwater and terrestrial acidification')	'SMR NG + CCS (MDEA), 98 (average)' (megajoule, CH, None)	Fuel supply chain	4.78739e-05
('ILCD 2.0 2018 midpoint', 'ecosystem quality', 'freshwater and terrestrial acidification')	'SMR NG + CCS (MDEA), 98 (average)' (megajoule, CH, None)	Plant infrastructure	7.89879e-06
('ILCD 2.0 2018 midpoint', 'ecosystem quality', 'freshwater and terrestrial acidification')	'SMR NG + CCS (MDEA), 98 (average)' (megajoule, CH, None)	Water supply	2.47421e-07
('ILCD 2.0 2018 midpoint', 'ecosystem quality', 'freshwater and terrestrial acidification')	'SMR NG + CCS (MDEA), 98 (average)' (megajoule, CH, None)	Electricity from/to grid	6.30802e-06
('ILCD 2.0 2018 midpoint', 'ecosystem quality', 'freshwater and terrestrial acidification')	'SMR NG + CCS (MDEA), 98 (average)' (megajoule, CH, None)	Catalysts&adsorbents	7.87251e-06
('ILCD 2.0 2018 midpoint', 'ecosystem quality', 'freshwater and terrestrial acidification')	'SMR NG + CCS (MDEA), 98 (average)' (megajoule, CH, None)	CO2 transport and storage	1.01042e-06
('ILCD 2.0 2018 midpoint', 'ecosystem quality', 'freshwater and terrestrial acidification')	'SMR NG + CCS (MDEA), 98 (average)' (megajoule, CH, None)	Direct CO2 emissions	0
('ILCD 2.0 2018 midpoint', 'ecosystem quality', 'freshwater and terrestrial acidification')	'SMR NG + CCS (MDEA), 98 (average)' (megajoule, CH, None)	Emissions from fuel burning in furnace	2.32192e-06
('ILCD 2.0 2018 midpoint', 'ecosystem quality', 'freshwater and terrestrial acidification')	'SMR NG, HT+LT, + CCS (VPSA), 98 (lower bound)' (megajoule, CH, None)	Fuel supply chain	4.79044e-05
('ILCD 2.0 2018 midpoint', 'ecosystem quality', 'freshwater and terrestrial acidification')	'SMR NG, HT+LT, + CCS (VPSA), 98 (lower bound)' (megajoule, CH, None)	Plant infrastructure	7.89897e-06
('ILCD 2.0 2018 midpoint', 'ecosystem quality', 'freshwater and terrestrial acidification')	'SMR NG, HT+LT, + CCS (VPSA), 98 (lower bound)' (megajoule, CH, None)	Water supply	2.47427e-07
('ILCD 2.0 2018 midpoint', 'ecosystem quality', 'freshwater and terrestrial acidification')	'SMR NG, HT+LT, + CCS (VPSA), 98 (lower bound)' (megajoule, CH, None)	Electricity from/to grid	1.34777e-05
('ILCD 2.0 2018 midpoint', 'ecosystem quality', 'freshwater and terrestrial acidification')	'SMR NG, HT+LT, + CCS (VPSA), 98 (lower bound)' (megajoule, CH, None)	Catalysts&adsorbents	7.85337e-06
('ILCD 2.0 2018 midpoint', 'ecosystem quality', 'freshwater and terrestrial acidification')	'SMR NG, HT+LT, + CCS (VPSA), 98 (lower bound)' (megajoule, CH, None)	CO2 transport and storage	1.179e-06
('ILCD 2.0 2018 midpoint', 'ecosystem quality', 'freshwater and terrestrial acidification')	'SMR NG, HT+LT, + CCS (VPSA), 98 (lower bound)' (megajoule, CH, None)	Direct CO2 emissions	0
('ILCD 2.0 2018 midpoint', 'ecosystem quality', 'freshwater and terrestrial acidification')	'SMR NG, HT+LT, + CCS (VPSA), 98 (lower bound)' (megajoule, CH, None)	Emissions from fuel burning in furnace	3.90248e-06
('ILCD 2.0 2018 midpoint', 'ecosystem quality', 'freshwater and terrestrial acidification')	'SMR NG, HT+LT, + CCS (MDEA), 90 (upper bound)' (megajoule, CH, None)	Fuel supply chain	4.769e-05
('ILCD 2.0 2018 midpoint', 'ecosystem quality', 'freshwater and terrestrial acidification')	'SMR NG, HT+LT, + CCS (MDEA), 90 (upper bound)' (megajoule, CH, None)	Plant infrastructure	7.8979e-06
('ILCD 2.0 2018 midpoint', 'ecosystem quality', 'freshwater and terrestrial acidification')	'SMR NG, HT+LT, + CCS (MDEA), 90 (upper bound)' (megajoule, CH, None)	Water supply	2.47392e-07
('ILCD 2.0 2018 midpoint', 'ecosystem quality', 'freshwater and terrestrial acidification')	'SMR NG, HT+LT, + CCS (MDEA), 90 (upper bound)' (megajoule, CH, None)	Electricity from/to grid	8.71531e-06
('ILCD 2.0 2018 midpoint', 'ecosystem quality', 'freshwater and terrestrial acidification')	'SMR NG, HT+LT, + CCS (MDEA), 90 (upper bound)' (megajoule, CH, None)	Catalysts&adsorbents	7.87406e-06
('ILCD 2.0 2018 midpoint', 'ecosystem quality', 'freshwater and terrestrial acidification')	'SMR NG, HT+LT, + CCS (MDEA), 90 (upper bound)' (megajoule, CH, None)	CO2 transport and storage	1.09211e-06
('ILCD 2.0 2018 midpoint', 'ecosystem quality', 'freshwater and terrestrial acidification')	'SMR NG, HT+LT, + CCS (MDEA), 90 (upper bound)' (megajoule, CH, None)	Direct CO2 emissions	0
('ILCD 2.0 2018 midpoint', 'ecosystem quality', 'freshwater and terrestrial acidification')	'SMR NG, HT+LT, + CCS (MDEA), 90 (upper bound)' (megajoule, CH, None)	Emissions from fuel burning in furnace	3.27912e-06
('ILCD 2.0 2018 midpoint', 'ecosystem quality', 'freshwater and terrestrial acidification')	'SMR BM, HT+LT, + CCS (MDEA), 98 (average), cut-off approach' (megajoule, CH, None)	Fuel supply chain	0.000100958
('ILCD 2.0 2018 midpoint', 'ecosystem quality', 'freshwater and terrestrial acidification')	'SMR BM, HT+LT, + CCS (MDEA), 98 (average), cut-off approach' (megajoule, CH, None)	Plant infrastructure	7.89882e-06
('ILCD 2.0 2018 midpoint', 'ecosystem quality', 'freshwater and terrestrial acidification')	'SMR BM, HT+LT, + CCS (MDEA), 98 (average), cut-off approach' (megajoule, CH, None)	Water supply	2.47422e-07
('ILCD 2.0 2018 midpoint', 'ecosystem quality', 'freshwater and terrestrial acidification')	'SMR BM, HT+LT, + CCS (MDEA), 98 (average), cut-off approach' (megajoule, CH, None)	Electricity from/to grid	1.15048e-05
('ILCD 2.0 2018 midpoint', 'ecosystem quality', 'freshwater and terrestrial acidification')	'SMR BM, HT+LT, + CCS (MDEA), 98 (average), cut-off approach' (megajoule, CH, None)	Catalysts&adsorbents	7.87583e-06
('ILCD 2.0 2018 midpoint', 'ecosystem quality', 'freshwater and terrestrial acidification')	'SMR BM, HT+LT, + CCS (MDEA), 98 (average), cut-off approach' (megajoule, CH, None)	CO2 transport and storage	1.18555e-06
('ILCD 2.0 2018 midpoint', 'ecosystem quality', 'freshwater and terrestrial acidification')	'SMR BM, HT+LT, + CCS (MDEA), 98 (average), cut-off approach' (megajoule, CH, None)	Direct CO2 emissions	0
('ILCD 2.0 2018 midpoint', 'ecosystem quality', 'freshwater and terrestrial acidification')	'SMR BM, HT+LT, + CCS (MDEA), 98 (average), cut-off approach' (megajoule, CH, None)	Emissions from fuel burning in furnace	3.32751e-06
('ILCD 2.0 2018 midpoint', 'ecosystem quality', 'freshwater and terrestrial acidification')	'SMR NG/BM, HT+LT, 50:50 + CCS (MDEA), 98 (average), digestate incineration' (megajoule, CH, None)	Fuel supply chain	7.30731e-05
('ILCD 2.0 2018 midpoint', 'ecosystem quality', 'freshwater and terrestrial acidification')	'SMR NG/BM, HT+LT, 50:50 + CCS (MDEA), 98 (average), digestate incineration' (megajoule, CH, None)	Plant infrastructure	7.8979e-06
('ILCD 2.0 2018 midpoint', 'ecosystem quality', 'freshwater and terrestrial acidification')	'SMR NG/BM, HT+LT, 50:50 + CCS (MDEA), 98 (average), digestate incineration' (megajoule, CH, None)	Water supply	2.47392e-07
('ILCD 2.0 2018 midpoint', 'ecosystem quality', 'freshwater and terrestrial acidification')	'SMR NG/BM, HT+LT, 50:50 + CCS (MDEA), 98 (average), digestate incineration' (megajoule, CH, None)	Electricity from/to grid	1.19788e-05
('ILCD 2.0 2018 midpoint', 'ecosystem quality', 'freshwater and terrestrial acidification')	'SMR NG/BM, HT+LT, 50:50 + CCS (MDEA), 98 (average), digestate incineration' (megajoule, CH, None)	Catalysts&adsorbents	7.87587e-06
('ILCD 2.0 2018 midpoint', 'ecosystem quality', 'freshwater and terrestrial acidification')	'SMR NG/BM, HT+LT, 50:50 + CCS (MDEA), 98 (average), digestate incineration' (megajoule, CH, None)	CO2 transport and storage	1.18777e-06
('ILCD 2.0 2018 midpoint', 'ecosystem quality', 'freshwater and terrestrial acidification')	'SMR NG/BM, HT+LT, 50:50 + CCS (MDEA), 98 (average), digestate incineration' (megajoule, CH, None)	Direct CO2 emissions	0
('ILCD 2.0 2018 midpoint', 'ecosystem quality', 'freshwater and terrestrial acidification')	'SMR NG/BM, HT+LT, 50:50 + CCS (MDEA), 98 (average), digestate incineration' (megajoule, CH, None)	Emissions from fuel burning in furnace	3.26277e-06
('ILCD 2.0 2018 midpoint', 'ecosystem quality', 'freshwater and terrestrial acidification')	'SMR BM + CCS (MDEA), 98 (lower bound)' (megajoule, CH, None)	Fuel supply chain	0.000101307
('ILCD 2.0 2018 midpoint', 'ecosystem quality', 'freshwater and terrestrial acidification')	'SMR BM + CCS (MDEA), 98 (lower bound)' (megajoule, CH, None)	Plant infrastructure	7.8988e-06
('ILCD 2.0 2018 midpoint', 'ecosystem quality', 'freshwater and terrestrial acidification')	'SMR BM + CCS (MDEA), 98 (lower bound)' (megajoule, CH, None)	Water supply	2.47421e-07
('ILCD 2.0 2018 midpoint', 'ecosystem quality', 'freshwater and terrestrial acidification')	'SMR BM + CCS (MDEA), 98 (lower bound)' (megajoule, CH, None)	Electricity from/to grid	6.66294e-06
('ILCD 2.0 2018 midpoint', 'ecosystem quality', 'freshwater and terrestrial acidification')	'SMR BM + CCS (MDEA), 98 (lower bound)' (megajoule, CH, None)	Catalysts&adsorbents	7.87256e-06
('ILCD 2.0 2018 midpoint', 'ecosystem quality', 'freshwater and terrestrial acidification')	'SMR BM + CCS (MDEA), 98 (lower bound)' (megajoule, CH, None)	CO2 transport and storage	1.01295e-06
('ILCD 2.0 2018 midpoint', 'ecosystem quality', 'freshwater and terrestrial acidification')	'SMR BM + CCS (MDEA), 98 (lower bound)' (megajoule, CH, None)	Direct CO2 emissions	0
('ILCD 2.0 2018 midpoint', 'ecosystem quality', 'freshwater and terrestrial acidification')	'SMR BM + CCS (MDEA), 98 (lower bound)' (megajoule, CH, None)	Emissions from fuel burning in furnace	2.40652e-06
('ILCD 2.0 2018 midpoint', 'ecosystem quality', 'freshwater and terrestrial acidification')	'SMR NG/BM, HT+LT, 25:75 + CCS (MDEA), 98 (average)' (megajoule, CH, None)	Fuel supply chain	8.57863e-05
('ILCD 2.0 2018 midpoint', 'ecosystem quality', 'freshwater and terrestrial acidification')	'SMR NG/BM, HT+LT, 25:75 + CCS (MDEA), 98 (average)' (megajoule, CH, None)	Plant infrastructure	7.8979e-06
('ILCD 2.0 2018 midpoint', 'ecosystem quality', 'freshwater and terrestrial acidification')	'SMR NG/BM, HT+LT, 25:75 + CCS (MDEA), 98 (average)' (megajoule, CH, None)	Water supply	2.47392e-07
('ILCD 2.0 2018 midpoint', 'ecosystem quality', 'freshwater and terrestrial acidification')	'SMR NG/BM, HT+LT, 25:75 + CCS (MDEA), 98 (average)' (megajoule, CH, None)	Electricity from/to grid	1.19788e-05
('ILCD 2.0 2018 midpoint', 'ecosystem quality', 'freshwater and terrestrial acidification')	'SMR NG/BM, HT+LT, 25:75 + CCS (MDEA), 98 (average)' (megajoule, CH, None)	Catalysts&adsorbents	7.87587e-06
('ILCD 2.0 2018 midpoint', 'ecosystem quality', 'freshwater and terrestrial acidification')	'SMR NG/BM, HT+LT, 25:75 + CCS (MDEA), 98 (average)' (megajoule, CH, None)	CO2 transport and storage	1.18777e-06
('ILCD 2.0 2018 midpoint', 'ecosystem quality', 'freshwater and terrestrial acidification')	'SMR NG/BM, HT+LT, 25:75 + CCS (MDEA), 98 (average)' (megajoule, CH, None)	Direct CO2 emissions	0
('ILCD 2.0 2018 midpoint', 'ecosystem quality', 'freshwater and terrestrial acidification')	'SMR NG/BM, HT+LT, 25:75 + CCS (MDEA), 98 (average)' (megajoule, CH, None)	Emissions from fuel burning in furnace	3.26277e-06
('ILCD 2.0 2018 midpoint', 'ecosystem quality', 'freshwater and terrestrial acidification')	'SMR NG/BM, HT+LT, 70:30 + CCS (MDEA), 98 (average), digestate incineration' (megajoule, CH, None)	Fuel supply chain	6.29025e-05
('ILCD 2.0 2018 midpoint', 'ecosystem quality', 'freshwater and terrestrial acidification')	'SMR NG/BM, HT+LT, 70:30 + CCS (MDEA), 98 (average), digestate incineration' (megajoule, CH, None)	Plant infrastructure	7.8979e-06
('ILCD 2.0 2018 midpoint', 'ecosystem quality', 'freshwater and terrestrial acidification')	'SMR NG/BM, HT+LT, 70:30 + CCS (MDEA), 98 (average), digestate incineration' (megajoule, CH, None)	Water supply	2.47392e-07
('ILCD 2.0 2018 midpoint', 'ecosystem quality', 'freshwater and terrestrial acidification')	'SMR NG/BM, HT+LT, 70:30 + CCS (MDEA), 98 (average), digestate incineration' (megajoule, CH, None)	Electricity from/to grid	1.19788e-05
('ILCD 2.0 2018 midpoint', 'ecosystem quality', 'freshwater and terrestrial acidification')	'SMR NG/BM, HT+LT, 70:30 + CCS (MDEA), 98 (average), digestate incineration' (megajoule, CH, None)	Catalysts&adsorbents	7.87587e-06
('ILCD 2.0 2018 midpoint', 'ecosystem quality', 'freshwater and terrestrial acidification')	'SMR NG/BM, HT+LT, 70:30 + CCS (MDEA), 98 (average), digestate incineration' (megajoule, CH, None)	CO2 transport and storage	1.18777e-06
('ILCD 2.0 2018 midpoint', 'ecosystem quality', 'freshwater and terrestrial acidification')	'SMR NG/BM, HT+LT, 70:30 + CCS (MDEA), 98 (average), digestate incineration' (megajoule, CH, None)	Direct CO2 emissions	0
('ILCD 2.0 2018 midpoint', 'ecosystem quality', 'freshwater and terrestrial acidification')	'SMR NG/BM, HT+LT, 70:30 + CCS (MDEA), 98 (average), digestate incineration' (megajoule, CH, None)	Emissions from fuel burning in furnace	3.26277e-06
('ILCD 2.0 2018 midpoint', 'ecosystem quality', 'freshwater and terrestrial acidification')	'SMR NG + CCS (VPSA), 98 (lower bound)' (megajoule, CH, None)	Fuel supply chain	4.79338e-05
('ILCD 2.0 2018 midpoint', 'ecosystem quality', 'freshwater and terrestrial acidification')	'SMR NG + CCS (VPSA), 98 (lower bound)' (megajoule, CH, None)	Plant infrastructure	7.89896e-06
('ILCD 2.0 2018 midpoint', 'ecosystem quality', 'freshwater and terrestrial acidification')	'SMR NG + CCS (VPSA), 98 (lower bound)' (megajoule, CH, None)	Water supply	2.47426e-07
('ILCD 2.0 2018 midpoint', 'ecosystem quality', 'freshwater and terrestrial acidification')	'SMR NG + CCS (VPSA), 98 (lower bound)' (megajoule, CH, None)	Electricity from/to grid	1.15528e-05
('ILCD 2.0 2018 midpoint', 'ecosystem quality', 'freshwater and terrestrial acidification')	'SMR NG + CCS (VPSA), 98 (lower bound)' (megajoule, CH, None)	Catalysts&adsorbents	7.85337e-06
('ILCD 2.0 2018 midpoint', 'ecosystem quality', 'freshwater and terrestrial acidification')	'SMR NG + CCS (VPSA), 98 (lower bound)' (megajoule, CH, None)	CO2 transport and storage	1.01126e-06
('ILCD 2.0 2018 midpoint', 'ecosystem quality', 'freshwater and terrestrial acidification')	'SMR NG + CCS (VPSA), 98 (lower bound)' (megajoule, CH, None)	Direct CO2 emissions	0
('ILCD 2.0 2018 midpoint', 'ecosystem quality', 'freshwater and terrestrial acidification')	'SMR NG + CCS (VPSA), 98 (lower bound)' (megajoule, CH, None)	Emissions from fuel burning in furnace	2.65081e-06
('ILCD 2.0 2018 midpoint', 'ecosystem quality', 'freshwater and terrestrial acidification')	'SMR BM, HT+LT, with digestate incineration' (megajoule, CH, None)	Fuel supply chain	0.000103004
('ILCD 2.0 2018 midpoint', 'ecosystem quality', 'freshwater and terrestrial acidification')	'SMR BM, HT+LT, with digestate incineration' (megajoule, CH, None)	Plant infrastructure	7.89879e-06
('ILCD 2.0 2018 midpoint', 'ecosystem quality', 'freshwater and terrestrial acidification')	'SMR BM, HT+LT, with digestate incineration' (megajoule, CH, None)	Water supply	2.47421e-07
('ILCD 2.0 2018 midpoint', 'ecosystem quality', 'freshwater and terrestrial acidification')	'SMR BM, HT+LT, with digestate incineration' (megajoule, CH, None)	Electricity from/to grid	-9.79136e-07
('ILCD 2.0 2018 midpoint', 'ecosystem quality', 'freshwater and terrestrial acidification')	'SMR BM, HT+LT, with digestate incineration' (megajoule, CH, None)	Catalysts&adsorbents	7.85337e-06
('ILCD 2.0 2018 midpoint', 'ecosystem quality', 'freshwater and terrestrial acidification')	'SMR BM, HT+LT, with digestate incineration' (megajoule, CH, None)	Direct CO2 emissions	0
('ILCD 2.0 2018 midpoint', 'ecosystem quality', 'freshwater and terrestrial acidification')	'SMR BM, HT+LT, with digestate incineration' (megajoule, CH, None)	Emissions from fuel burning in furnace	3.69108e-06
('ILCD 2.0 2018 midpoint', 'ecosystem quality', 'freshwater and terrestrial acidification')	'SMR BM, HT+LT, + CCS (MDEA), 98 (lower bound)' (megajoule, CH, None)	Fuel supply chain	0.000100958
('ILCD 2.0 2018 midpoint', 'ecosystem quality', 'freshwater and terrestrial acidification')	'SMR BM, HT+LT, + CCS (MDEA), 98 (lower bound)' (megajoule, CH, None)	Plant infrastructure	7.89882e-06
('ILCD 2.0 2018 midpoint', 'ecosystem quality', 'freshwater and terrestrial acidification')	'SMR BM, HT+LT, + CCS (MDEA), 98 (lower bound)' (megajoule, CH, None)	Water supply	2.47422e-07
('ILCD 2.0 2018 midpoint', 'ecosystem quality', 'freshwater and terrestrial acidification')	'SMR BM, HT+LT, + CCS (MDEA), 98 (lower bound)' (megajoule, CH, None)	Electricity from/to grid	1.14242e-05
('ILCD 2.0 2018 midpoint', 'ecosystem quality', 'freshwater and terrestrial acidification')	'SMR BM, HT+LT, + CCS (MDEA), 98 (lower bound)' (megajoule, CH, None)	Catalysts&adsorbents	7.87583e-06
('ILCD 2.0 2018 midpoint', 'ecosystem quality', 'freshwater and terrestrial acidification')	'SMR BM, HT+LT, + CCS (MDEA), 98 (lower bound)' (megajoule, CH, None)	CO2 transport and storage	1.18555e-06
('ILCD 2.0 2018 midpoint', 'ecosystem quality', 'freshwater and terrestrial acidification')	'SMR BM, HT+LT, + CCS (MDEA), 98 (lower bound)' (megajoule, CH, None)	Direct CO2 emissions	0
('ILCD 2.0 2018 midpoint', 'ecosystem quality', 'freshwater and terrestrial acidification')	'SMR BM, HT+LT, + CCS (MDEA), 98 (lower bound)' (megajoule, CH, None)	Emissions from fuel burning in furnace	3.32751e-06
('ILCD 2.0 2018 midpoint', 'ecosystem quality', 'freshwater and terrestrial acidification')	'SMR NG/BM, HT+LT, 40:60 + CCS (MDEA), 98 (average), digestate incineration' (megajoule, CH, None)	Fuel supply chain	7.81584e-05
('ILCD 2.0 2018 midpoint', 'ecosystem quality', 'freshwater and terrestrial acidification')	'SMR NG/BM, HT+LT, 40:60 + CCS (MDEA), 98 (average), digestate incineration' (megajoule, CH, None)	Plant infrastructure	7.8979e-06
('ILCD 2.0 2018 midpoint', 'ecosystem quality', 'freshwater and terrestrial acidification')	'SMR NG/BM, HT+LT, 40:60 + CCS (MDEA), 98 (average), digestate incineration' (megajoule, CH, None)	Water supply	2.47392e-07
('ILCD 2.0 2018 midpoint', 'ecosystem quality', 'freshwater and terrestrial acidification')	'SMR NG/BM, HT+LT, 40:60 + CCS (MDEA), 98 (average), digestate incineration' (megajoule, CH, None)	Electricity from/to grid	1.19788e-05
('ILCD 2.0 2018 midpoint', 'ecosystem quality', 'freshwater and terrestrial acidification')	'SMR NG/BM, HT+LT, 40:60 + CCS (MDEA), 98 (average), digestate incineration' (megajoule, CH, None)	Catalysts&adsorbents	7.87587e-06
('ILCD 2.0 2018 midpoint', 'ecosystem quality', 'freshwater and terrestrial acidification')	'SMR NG/BM, HT+LT, 40:60 + CCS (MDEA), 98 (average), digestate incineration' (megajoule, CH, None)	CO2 transport and storage	1.18777e-06
('ILCD 2.0 2018 midpoint', 'ecosystem quality', 'freshwater and terrestrial acidification')	'SMR NG/BM, HT+LT, 40:60 + CCS (MDEA), 98 (average), digestate incineration' (megajoule, CH, None)	Direct CO2 emissions	0
('ILCD 2.0 2018 midpoint', 'ecosystem quality', 'freshwater and terrestrial acidification')	'SMR NG/BM, HT+LT, 40:60 + CCS (MDEA), 98 (average), digestate incineration' (megajoule, CH, None)	Emissions from fuel burning in furnace	3.26277e-06
('ILCD 2.0 2018 midpoint', 'ecosystem quality', 'freshwater and terrestrial acidification')	'SMR BM, HT+LT, + CCS (MDEA), 98 (average), digestate incineration' (megajoule, CH, None)	Fuel supply chain	0.000100958
('ILCD 2.0 2018 midpoint', 'ecosystem quality', 'freshwater and terrestrial acidification')	'SMR BM, HT+LT, + CCS (MDEA), 98 (average), digestate incineration' (megajoule, CH, None)	Plant infrastructure	7.89882e-06
('ILCD 2.0 2018 midpoint', 'ecosystem quality', 'freshwater and terrestrial acidification')	'SMR BM, HT+LT, + CCS (MDEA), 98 (average), digestate incineration' (megajoule, CH, None)	Water supply	2.47422e-07
('ILCD 2.0 2018 midpoint', 'ecosystem quality', 'freshwater and terrestrial acidification')	'SMR BM, HT+LT, + CCS (MDEA), 98 (average), digestate incineration' (megajoule, CH, None)	Electricity from/to grid	1.15048e-05
('ILCD 2.0 2018 midpoint', 'ecosystem quality', 'freshwater and terrestrial acidification')	'SMR BM, HT+LT, + CCS (MDEA), 98 (average), digestate incineration' (megajoule, CH, None)	Catalysts&adsorbents	7.87583e-06
('ILCD 2.0 2018 midpoint', 'ecosystem quality', 'freshwater and terrestrial acidification')	'SMR BM, HT+LT, + CCS (MDEA), 98 (average), digestate incineration' (megajoule, CH, None)	CO2 transport and storage	1.18555e-06
('ILCD 2.0 2018 midpoint', 'ecosystem quality', 'freshwater and terrestrial acidification')	'SMR BM, HT+LT, + CCS (MDEA), 98 (average), digestate incineration' (megajoule, CH, None)	Direct CO2 emissions	0
('ILCD 2.0 2018 midpoint', 'ecosystem quality', 'freshwater and terrestrial acidification')	'SMR BM, HT+LT, + CCS (MDEA), 98 (average), digestate incineration' (megajoule, CH, None)	Emissions from fuel burning in furnace	3.32751e-06
('ILCD 2.0 2018 midpoint', 'ecosystem quality', 'freshwater and terrestrial acidification')	'SMR NG/BM, HT+LT, 80:20 + CCS (MDEA), 98 (average)' (megajoule, CH, None)	Fuel supply chain	5.78172e-05
('ILCD 2.0 2018 midpoint', 'ecosystem quality', 'freshwater and terrestrial acidification')	'SMR NG/BM, HT+LT, 80:20 + CCS (MDEA), 98 (average)' (megajoule, CH, None)	Plant infrastructure	7.8979e-06
('ILCD 2.0 2018 midpoint', 'ecosystem quality', 'freshwater and terrestrial acidification')	'SMR NG/BM, HT+LT, 80:20 + CCS (MDEA), 98 (average)' (megajoule, CH, None)	Water supply	2.47392e-07
('ILCD 2.0 2018 midpoint', 'ecosystem quality', 'freshwater and terrestrial acidification')	'SMR NG/BM, HT+LT, 80:20 + CCS (MDEA), 98 (average)' (megajoule, CH, None)	Electricity from/to grid	1.19788e-05
('ILCD 2.0 2018 midpoint', 'ecosystem quality', 'freshwater and terrestrial acidification')	'SMR NG/BM, HT+LT, 80:20 + CCS (MDEA), 98 (average)' (megajoule, CH, None)	Catalysts&adsorbents	7.87587e-06
('ILCD 2.0 2018 midpoint', 'ecosystem quality', 'freshwater and terrestrial acidification')	'SMR NG/BM, HT+LT, 80:20 + CCS (MDEA), 98 (average)' (megajoule, CH, None)	CO2 transport and storage	1.18777e-06
('ILCD 2.0 2018 midpoint', 'ecosystem quality', 'freshwater and terrestrial acidification')	'SMR NG/BM, HT+LT, 80:20 + CCS (MDEA), 98 (average)' (megajoule, CH, None)	Direct CO2 emissions	0
('ILCD 2.0 2018 midpoint', 'ecosystem quality', 'freshwater and terrestrial acidification')	'SMR NG/BM, HT+LT, 80:20 + CCS (MDEA), 98 (average)' (megajoule, CH, None)	Emissions from fuel burning in furnace	3.26277e-06
('ILCD 2.0 2018 midpoint', 'ecosystem quality', 'freshwater and terrestrial acidification')	'SMR NG + CCS (MDEA), 98 (average), 700 bar' (megajoule, CH, None)	Fuel supply chain	4.78739e-05
('ILCD 2.0 2018 midpoint', 'ecosystem quality', 'freshwater and terrestrial acidification')	'SMR NG + CCS (MDEA), 98 (average), 700 bar' (megajoule, CH, None)	Plant infrastructure	7.89879e-06
('ILCD 2.0 2018 midpoint', 'ecosystem quality', 'freshwater and terrestrial acidification')	'SMR NG + CCS (MDEA), 98 (average), 700 bar' (megajoule, CH, None)	Water supply	2.47421e-07
('ILCD 2.0 2018 midpoint', 'ecosystem quality', 'freshwater and terrestrial acidification')	'SMR NG + CCS (MDEA), 98 (average), 700 bar' (megajoule, CH, None)	Electricity from/to grid	5.14774e-05
('ILCD 2.0 2018 midpoint', 'ecosystem quality', 'freshwater and terrestrial acidification')	'SMR NG + CCS (MDEA), 98 (average), 700 bar' (megajoule, CH, None)	Catalysts&adsorbents	7.87251e-06
('ILCD 2.0 2018 midpoint', 'ecosystem quality', 'freshwater and terrestrial acidification')	'SMR NG + CCS (MDEA), 98 (average), 700 bar' (megajoule, CH, None)	CO2 transport and storage	1.01042e-06
('ILCD 2.0 2018 midpoint', 'ecosystem quality', 'freshwater and terrestrial acidification')	'SMR NG + CCS (MDEA), 98 (average), 700 bar' (megajoule, CH, None)	Direct CO2 emissions	0
('ILCD 2.0 2018 midpoint', 'ecosystem quality', 'freshwater and terrestrial acidification')	'SMR NG + CCS (MDEA), 98 (average), 700 bar' (megajoule, CH, None)	Emissions from fuel burning in furnace	2.32192e-06
('ILCD 2.0 2018 midpoint', 'ecosystem quality', 'freshwater and terrestrial acidification')	'SMR NG, 700 bar' (megajoule, CH, None)	Fuel supply chain	4.81737e-05
('ILCD 2.0 2018 midpoint', 'ecosystem quality', 'freshwater and terrestrial acidification')	'SMR NG, 700 bar' (megajoule, CH, None)	Plant infrastructure	7.89879e-06
('ILCD 2.0 2018 midpoint', 'ecosystem quality', 'freshwater and terrestrial acidification')	'SMR NG, 700 bar' (megajoule, CH, None)	Water supply	2.47421e-07
('ILCD 2.0 2018 midpoint', 'ecosystem quality', 'freshwater and terrestrial acidification')	'SMR NG, 700 bar' (megajoule, CH, None)	Electricity from/to grid	4.30341e-05
('ILCD 2.0 2018 midpoint', 'ecosystem quality', 'freshwater and terrestrial acidification')	'SMR NG, 700 bar' (megajoule, CH, None)	Catalysts&adsorbents	7.85337e-06
('ILCD 2.0 2018 midpoint', 'ecosystem quality', 'freshwater and terrestrial acidification')	'SMR NG, 700 bar' (megajoule, CH, None)	Direct CO2 emissions	0
('ILCD 2.0 2018 midpoint', 'ecosystem quality', 'freshwater and terrestrial acidification')	'SMR NG, 700 bar' (megajoule, CH, None)	Emissions from fuel burning in furnace	2.43479e-06
('ILCD 2.0 2018 midpoint', 'ecosystem quality', 'freshwater and terrestrial acidification')	'SMR BM + CCS (MDEA), 98 (average)' (megajoule, CH, None)	Fuel supply chain	0.000101307
('ILCD 2.0 2018 midpoint', 'ecosystem quality', 'freshwater and terrestrial acidification')	'SMR BM + CCS (MDEA), 98 (average)' (megajoule, CH, None)	Plant infrastructure	7.8988e-06
('ILCD 2.0 2018 midpoint', 'ecosystem quality', 'freshwater and terrestrial acidification')	'SMR BM + CCS (MDEA), 98 (average)' (megajoule, CH, None)	Water supply	2.47421e-07
('ILCD 2.0 2018 midpoint', 'ecosystem quality', 'freshwater and terrestrial acidification')	'SMR BM + CCS (MDEA), 98 (average)' (megajoule, CH, None)	Electricity from/to grid	6.73375e-06
('ILCD 2.0 2018 midpoint', 'ecosystem quality', 'freshwater and terrestrial acidification')	'SMR BM + CCS (MDEA), 98 (average)' (megajoule, CH, None)	Catalysts&adsorbents	7.87256e-06
('ILCD 2.0 2018 midpoint', 'ecosystem quality', 'freshwater and terrestrial acidification')	'SMR BM + CCS (MDEA), 98 (average)' (megajoule, CH, None)	CO2 transport and storage	1.01295e-06
('ILCD 2.0 2018 midpoint', 'ecosystem quality', 'freshwater and terrestrial acidification')	'SMR BM + CCS (MDEA), 98 (average)' (megajoule, CH, None)	Direct CO2 emissions	0
('ILCD 2.0 2018 midpoint', 'ecosystem quality', 'freshwater and terrestrial acidification')	'SMR BM + CCS (MDEA), 98 (average)' (megajoule, CH, None)	Emissions from fuel burning in furnace	2.40652e-06
('ILCD 2.0 2018 midpoint', 'ecosystem quality', 'freshwater and terrestrial acidification')	'SMR NG, HT+LT, 700 bar' (megajoule, CH, None)	Fuel supply chain	4.84694e-05
('ILCD 2.0 2018 midpoint', 'ecosystem quality', 'freshwater and terrestrial acidification')	'SMR NG, HT+LT, 700 bar' (megajoule, CH, None)	Plant infrastructure	7.89879e-06
('ILCD 2.0 2018 midpoint', 'ecosystem quality', 'freshwater and terrestrial acidification')	'SMR NG, HT+LT, 700 bar' (megajoule, CH, None)	Water supply	2.47421e-07
('ILCD 2.0 2018 midpoint', 'ecosystem quality', 'freshwater and terrestrial acidification')	'SMR NG, HT+LT, 700 bar' (megajoule, CH, None)	Electricity from/to grid	4.5948e-05
('ILCD 2.0 2018 midpoint', 'ecosystem quality', 'freshwater and terrestrial acidification')	'SMR NG, HT+LT, 700 bar' (megajoule, CH, None)	Catalysts&adsorbents	7.85337e-06
('ILCD 2.0 2018 midpoint', 'ecosystem quality', 'freshwater and terrestrial acidification')	'SMR NG, HT+LT, 700 bar' (megajoule, CH, None)	Direct CO2 emissions	0
('ILCD 2.0 2018 midpoint', 'ecosystem quality', 'freshwater and terrestrial acidification')	'SMR NG, HT+LT, 700 bar' (megajoule, CH, None)	Emissions from fuel burning in furnace	3.57046e-06
('ILCD 2.0 2018 midpoint', 'ecosystem quality', 'freshwater and terrestrial acidification')	'SMR NG/BM, HT+LT, 20:80 + CCS (MDEA), 98 (average)' (megajoule, CH, None)	Fuel supply chain	8.8329e-05
('ILCD 2.0 2018 midpoint', 'ecosystem quality', 'freshwater and terrestrial acidification')	'SMR NG/BM, HT+LT, 20:80 + CCS (MDEA), 98 (average)' (megajoule, CH, None)	Plant infrastructure	7.8979e-06
('ILCD 2.0 2018 midpoint', 'ecosystem quality', 'freshwater and terrestrial acidification')	'SMR NG/BM, HT+LT, 20:80 + CCS (MDEA), 98 (average)' (megajoule, CH, None)	Water supply	2.47392e-07
('ILCD 2.0 2018 midpoint', 'ecosystem quality', 'freshwater and terrestrial acidification')	'SMR NG/BM, HT+LT, 20:80 + CCS (MDEA), 98 (average)' (megajoule, CH, None)	Electricity from/to grid	1.19788e-05
('ILCD 2.0 2018 midpoint', 'ecosystem quality', 'freshwater and terrestrial acidification')	'SMR NG/BM, HT+LT, 20:80 + CCS (MDEA), 98 (average)' (megajoule, CH, None)	Catalysts&adsorbents	7.87587e-06
('ILCD 2.0 2018 midpoint', 'ecosystem quality', 'freshwater and terrestrial acidification')	'SMR NG/BM, HT+LT, 20:80 + CCS (MDEA), 98 (average)' (megajoule, CH, None)	CO2 transport and storage	1.18777e-06
('ILCD 2.0 2018 midpoint', 'ecosystem quality', 'freshwater and terrestrial acidification')	'SMR NG/BM, HT+LT, 20:80 + CCS (MDEA), 98 (average)' (megajoule, CH, None)	Direct CO2 emissions	0
('ILCD 2.0 2018 midpoint', 'ecosystem quality', 'freshwater and terrestrial acidification')	'SMR NG/BM, HT+LT, 20:80 + CCS (MDEA), 98 (average)' (megajoule, CH, None)	Emissions from fuel burning in furnace	3.26277e-06
('ILCD 2.0 2018 midpoint', 'ecosystem quality', 'freshwater and terrestrial acidification')	'SMR NG/BM, HT+LT, 90:10 + CCS (MDEA), 98 (average), digestate incineration' (megajoule, CH, None)	Fuel supply chain	5.27319e-05
('ILCD 2.0 2018 midpoint', 'ecosystem quality', 'freshwater and terrestrial acidification')	'SMR NG/BM, HT+LT, 90:10 + CCS (MDEA), 98 (average), digestate incineration' (megajoule, CH, None)	Plant infrastructure	7.8979e-06
('ILCD 2.0 2018 midpoint', 'ecosystem quality', 'freshwater and terrestrial acidification')	'SMR NG/BM, HT+LT, 90:10 + CCS (MDEA), 98 (average), digestate incineration' (megajoule, CH, None)	Water supply	2.47392e-07
('ILCD 2.0 2018 midpoint', 'ecosystem quality', 'freshwater and terrestrial acidification')	'SMR NG/BM, HT+LT, 90:10 + CCS (MDEA), 98 (average), digestate incineration' (megajoule, CH, None)	Electricity from/to grid	1.19788e-05
('ILCD 2.0 2018 midpoint', 'ecosystem quality', 'freshwater and terrestrial acidification')	'SMR NG/BM, HT+LT, 90:10 + CCS (MDEA), 98 (average), digestate incineration' (megajoule, CH, None)	Catalysts&adsorbents	7.87587e-06
('ILCD 2.0 2018 midpoint', 'ecosystem quality', 'freshwater and terrestrial acidification')	'SMR NG/BM, HT+LT, 90:10 + CCS (MDEA), 98 (average), digestate incineration' (megajoule, CH, None)	CO2 transport and storage	1.18777e-06
('ILCD 2.0 2018 midpoint', 'ecosystem quality', 'freshwater and terrestrial acidification')	'SMR NG/BM, HT+LT, 90:10 + CCS (MDEA), 98 (average), digestate incineration' (megajoule, CH, None)	Direct CO2 emissions	0
('ILCD 2.0 2018 midpoint', 'ecosystem quality', 'freshwater and terrestrial acidification')	'SMR NG/BM, HT+LT, 90:10 + CCS (MDEA), 98 (average), digestate incineration' (megajoule, CH, None)	Emissions from fuel burning in furnace	3.26277e-06
('ILCD 2.0 2018 midpoint', 'ecosystem quality', 'freshwater and terrestrial acidification')	'SMR BM, HT+LT, + CCS (MDEA), 98 (average), digestate incineration, 26 bar' (megajoule, CH, None)	Fuel supply chain	0.000100958
('ILCD 2.0 2018 midpoint', 'ecosystem quality', 'freshwater and terrestrial acidification')	'SMR BM, HT+LT, + CCS (MDEA), 98 (average), digestate incineration, 26 bar' (megajoule, CH, None)	Plant infrastructure	7.89882e-06
('ILCD 2.0 2018 midpoint', 'ecosystem quality', 'freshwater and terrestrial acidification')	'SMR BM, HT+LT, + CCS (MDEA), 98 (average), digestate incineration, 26 bar' (megajoule, CH, None)	Water supply	2.47422e-07
('ILCD 2.0 2018 midpoint', 'ecosystem quality', 'freshwater and terrestrial acidification')	'SMR BM, HT+LT, + CCS (MDEA), 98 (average), digestate incineration, 26 bar' (megajoule, CH, None)	Electricity from/to grid	-1.02981e-05
('ILCD 2.0 2018 midpoint', 'ecosystem quality', 'freshwater and terrestrial acidification')	'SMR BM, HT+LT, + CCS (MDEA), 98 (average), digestate incineration, 26 bar' (megajoule, CH, None)	Catalysts&adsorbents	7.87583e-06
('ILCD 2.0 2018 midpoint', 'ecosystem quality', 'freshwater and terrestrial acidification')	'SMR BM, HT+LT, + CCS (MDEA), 98 (average), digestate incineration, 26 bar' (megajoule, CH, None)	CO2 transport and storage	1.18555e-06
('ILCD 2.0 2018 midpoint', 'ecosystem quality', 'freshwater and terrestrial acidification')	'SMR BM, HT+LT, + CCS (MDEA), 98 (average), digestate incineration, 26 bar' (megajoule, CH, None)	Direct CO2 emissions	0
('ILCD 2.0 2018 midpoint', 'ecosystem quality', 'freshwater and terrestrial acidification')	'SMR BM, HT+LT, + CCS (MDEA), 98 (average), digestate incineration, 26 bar' (megajoule, CH, None)	Emissions from fuel burning in furnace	3.32751e-06
('ILCD 2.0 2018 midpoint', 'ecosystem quality', 'freshwater and terrestrial acidification')	'SMR NG + CCS (MDEA), 98 (upper bound)' (megajoule, CH, None)	Fuel supply chain	4.78739e-05
('ILCD 2.0 2018 midpoint', 'ecosystem quality', 'freshwater and terrestrial acidification')	'SMR NG + CCS (MDEA), 98 (upper bound)' (megajoule, CH, None)	Plant infrastructure	7.89879e-06
('ILCD 2.0 2018 midpoint', 'ecosystem quality', 'freshwater and terrestrial acidification')	'SMR NG + CCS (MDEA), 98 (upper bound)' (megajoule, CH, None)	Water supply	2.47421e-07
('ILCD 2.0 2018 midpoint', 'ecosystem quality', 'freshwater and terrestrial acidification')	'SMR NG + CCS (MDEA), 98 (upper bound)' (megajoule, CH, None)	Electricity from/to grid	6.37895e-06
('ILCD 2.0 2018 midpoint', 'ecosystem quality', 'freshwater and terrestrial acidification')	'SMR NG + CCS (MDEA), 98 (upper bound)' (megajoule, CH, None)	Catalysts&adsorbents	7.87251e-06
('ILCD 2.0 2018 midpoint', 'ecosystem quality', 'freshwater and terrestrial acidification')	'SMR NG + CCS (MDEA), 98 (upper bound)' (megajoule, CH, None)	CO2 transport and storage	1.01042e-06
('ILCD 2.0 2018 midpoint', 'ecosystem quality', 'freshwater and terrestrial acidification')	'SMR NG + CCS (MDEA), 98 (upper bound)' (megajoule, CH, None)	Direct CO2 emissions	0
('ILCD 2.0 2018 midpoint', 'ecosystem quality', 'freshwater and terrestrial acidification')	'SMR NG + CCS (MDEA), 98 (upper bound)' (megajoule, CH, None)	Emissions from fuel burning in furnace	2.32192e-06
('ILCD 2.0 2018 midpoint', 'ecosystem quality', 'freshwater and terrestrial acidification')	'SMR NG, HT+LT, + CCS (MDEA), 98 (average), 100% BM' (megajoule, CH, None)	Fuel supply chain	9.84996e-05
('ILCD 2.0 2018 midpoint', 'ecosystem quality', 'freshwater and terrestrial acidification')	'SMR NG, HT+LT, + CCS (MDEA), 98 (average), 100% BM' (megajoule, CH, None)	Plant infrastructure	7.8979e-06
('ILCD 2.0 2018 midpoint', 'ecosystem quality', 'freshwater and terrestrial acidification')	'SMR NG, HT+LT, + CCS (MDEA), 98 (average), 100% BM' (megajoule, CH, None)	Water supply	2.47392e-07
('ILCD 2.0 2018 midpoint', 'ecosystem quality', 'freshwater and terrestrial acidification')	'SMR NG, HT+LT, + CCS (MDEA), 98 (average), 100% BM' (megajoule, CH, None)	Electricity from/to grid	1.19788e-05
('ILCD 2.0 2018 midpoint', 'ecosystem quality', 'freshwater and terrestrial acidification')	'SMR NG, HT+LT, + CCS (MDEA), 98 (average), 100% BM' (megajoule, CH, None)	Catalysts&adsorbents	7.87587e-06
('ILCD 2.0 2018 midpoint', 'ecosystem quality', 'freshwater and terrestrial acidification')	'SMR NG, HT+LT, + CCS (MDEA), 98 (average), 100% BM' (megajoule, CH, None)	CO2 transport and storage	1.18777e-06
[truncated: 21,754 more rows]

## Sheet: PassengerCars_Midsize_2020
powertrain, fuel	powertrain	fuel	fuel consumption [kg or kWh/km]	impact category	direct - exhaust	direct - non-exhaust	energy chain	maintenance	glider	EoL	powertrain	energy storage	road
[truncated: 703 more rows]

[truncated: 1 more sheets: Truck_26tRegional_2020]
